# Supplementary material for: Rh(iii)-catalyzed oxidative [4+2] annulation of 2-arylquinoxalines and 2-aryl-2H-indazoles with allyl alcohols
Source: Royal Society of Chemistry journal article supplement (doi:10.1039/d3cc04600a), 2023-11-28
Supplement: d3cc04600a1.pdf [file d3cc04600a1.pdf]

## Electronic Supporting Information

### **Rh(III)-catalyzed oxidative [4+2] annulation of 2-arylquinoxalines and 2-aryl-2*H*-indazoles with allyl alcohols**

Dhananjay S. Nipate,<sup>a</sup> Neha Meena,<sup>a</sup> Prakash N. Swami,<sup>a</sup> Krishnan Rangan<sup>b</sup> and Anil Kumar<sup>a,\*</sup>

<sup>a</sup>Department of Chemistry, Birla Institute of Technology and Science Pilani, Pilani Campus, Rajasthan, 333031, India

<sup>b</sup>Department of Chemistry, Birla Institute of Technology and Science Pilani, Hyderabad Campus, Telangana, 500078, India

E-mail: anilkumar@pilani.bits-pilani.ac.in

#### **Contents**

|    |                                                                                                                                                                                                                                                  |         |
|----|--------------------------------------------------------------------------------------------------------------------------------------------------------------------------------------------------------------------------------------------------|---------|
| 1  | General information                                                                                                                                                                                                                              | S2      |
| 2  | Optimization of reaction conditions                                                                                                                                                                                                              | S2      |
| 3  | General procedure for the synthesis of <b>3</b>                                                                                                                                                                                                  | S3      |
| 4  | General procedure for the synthesis of <b>5</b>                                                                                                                                                                                                  | S3      |
| 5  | Gram scale synthesis of <b>3aa</b> .                                                                                                                                                                                                             | S3      |
| 6  | Gram scale synthesis of <b>5aa</b> .                                                                                                                                                                                                             | S4      |
| 7  | Deuterium exchange studies<br>7.1 Deuterium exchange of <b>1b</b><br>7.2 Deuterium exchange of <b>4a</b><br>7.3 Deuterium exchange of <b>1b</b> in the presence of <b>2a</b><br>7.4 Deuterium exchange of <b>4a</b> in the presence of <b>2a</b> | S4-S6   |
| 8  | Intermediate isolation<br>8.1 Experimental procedure for isolation of <b>6ab</b><br>8.2 Experimental procedure for isolation of <b>7ac</b>                                                                                                       | S6      |
| 9  | Competition experiment<br>9.1 Experimental procedure for competition between <b>1b</b> and <b>1f</b><br>9.2 Experimental procedure for competition between <b>4c</b> and <b>4f</b>                                                               | S7-S8   |
| 10 | HRMS analysis of rhodacycle intermediate <b>C</b> and intermediate <b>E</b>                                                                                                                                                                      | S8      |
| 11 | Optimization of reaction condition for <b>5aa</b>                                                                                                                                                                                                | S9      |
| 12 | Physical and spectral data of <b>3aa-5hb</b> , <b>6ab</b> , <b>7ac</b> , <b>8</b> , <b>9</b> , <b>10</b> , <b>11</b> and <b>12</b>                                                                                                               | S9-S19  |
| 13 | Copies of <sup>1</sup> H NMR, <sup>13</sup> C{ <sup>1</sup> H} NMR of <b>3aa-5hb</b> , <b>6ab</b> , <b>7ac</b> , <b>8</b> , <b>9</b> , <b>10</b> , <b>11</b> and <b>12</b>                                                                       | S20-S68 |
| 14 | Single crystal X-ray diffraction data of <b>5aa</b>                                                                                                                                                                                              | S69-S70 |
| 15 | References                                                                                                                                                                                                                                       | S70     |

## 1. General information:

All chemicals and solvents purchased from commercial suppliers and used without purification unless otherwise noted. 2-Arylquinoxalines and 2-aryl-2*H*-indazoles were synthesized by following the reported procedure.<sup>1,2</sup> All reactions were monitored by thin layer chromatography (TLC) on pre-coated silica gel 60 F254 aluminium foils and visualized under a UV lamp (366 or 254 nm). Desired products were purified by column chromatography (silica gel 100-200 mesh size) using a gradient of ethyl acetate and hexanes as mobile phase. The <sup>1</sup>H NMR (400 MHz) and <sup>13</sup>C{<sup>1</sup>H} NMR (100 MHz) spectra were recorded on a Bruker Avance III spectrometer. Chemical shifts ( $\delta$ ) are reported in parts per million (ppm), and coupling constants (*J*) are reported in hertz (Hz). High-resolution mass spectra (HRMS) were recorded on a Q-TOF mass spectrometer. X-ray analysis was performed on a Rigaku Oxford XtaLAB AFC12 (RINC): Kappa dual home/near diffractometer.

## 2. Optimization of reaction conditions

**Table S1.** Selected experiments for optimization of reaction conditions for **3aa**.<sup>a</sup>

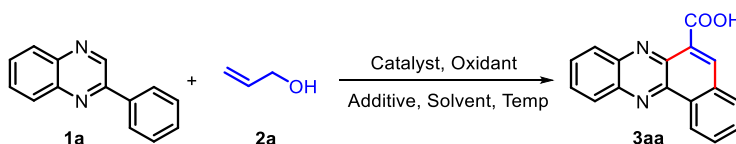

| Entry                     | Catalyst                                             | Oxidant                                   | Solvent     | Additive   | % Yield <sup>b</sup> |
|---------------------------|------------------------------------------------------|-------------------------------------------|-------------|------------|----------------------|
| 1                         | [RhCp*Cl <sub>2</sub> ] <sub>2</sub>                 | Cu(OAc) <sub>2</sub> ·H <sub>2</sub> O    | DCE         | -          | 41                   |
| 2                         | [Ru( <i>p</i> -cymene)Cl <sub>2</sub> ] <sub>2</sub> | Cu(OAc) <sub>2</sub> ·H <sub>2</sub> O    | DCE         | -          | NR                   |
| 3                         | Pd(OAc) <sub>2</sub>                                 | Cu(OAc) <sub>2</sub> ·H <sub>2</sub> O    | DCE         | -          | NR                   |
| 4                         | [CoCp*(CO)I <sub>2</sub> ]                           | Cu(OAc) <sub>2</sub> ·H <sub>2</sub> O    | DCE         | -          | 18                   |
| 5                         | [RhCp*Cl <sub>2</sub> ] <sub>2</sub>                 | Cu(OAc) <sub>2</sub>                      | DCE         | -          | 54                   |
| 6                         | [RhCp*Cl <sub>2</sub> ] <sub>2</sub>                 | Cu(OTf) <sub>2</sub>                      | DCE         | -          | 44                   |
| 7                         | [RhCp*Cl <sub>2</sub> ] <sub>2</sub>                 | CuSO <sub>4</sub> ·5H <sub>2</sub> O      | DCE         | -          | 37                   |
| 8                         | [RhCp*Cl <sub>2</sub> ] <sub>2</sub>                 | Ag <sub>2</sub> CO <sub>3</sub>           | DCE         | -          | 39                   |
| 9                         | [RhCp*Cl <sub>2</sub> ] <sub>2</sub>                 | Cu(OAc) <sub>2</sub> ·H <sub>2</sub> O    | MeOH        | -          | NR                   |
| 10                        | [RhCp*Cl <sub>2</sub> ] <sub>2</sub>                 | Cu(OAc) <sub>2</sub> ·H <sub>2</sub> O    | DMA         | -          | 63                   |
| 11                        | [RhCp*Cl <sub>2</sub> ] <sub>2</sub>                 | Cu(OAc) <sub>2</sub> ·H <sub>2</sub> O    | DMF         | -          | 57                   |
| 12                        | [RhCp*Cl <sub>2</sub> ] <sub>2</sub>                 | Cu(OAc) <sub>2</sub> ·H <sub>2</sub> O    | DMSO        | -          | 54                   |
| 13                        | [RhCp*Cl <sub>2</sub> ] <sub>2</sub>                 | Cu(OAc) <sub>2</sub> ·H <sub>2</sub> O    | HFIP        | -          | 69                   |
| <b>14<sup>c,d,e</sup></b> | <b>[RhCp*Cl<sub>2</sub>]<sub>2</sub></b>             | <b>Cu(OAc)<sub>2</sub>·H<sub>2</sub>O</b> | <b>HFIP</b> | <b>ADA</b> | <b>81</b>            |
| 15                        | [RhCp*Cl <sub>2</sub> ] <sub>2</sub>                 | Cu(OAc) <sub>2</sub> ·H <sub>2</sub> O    | HFIP        | PiOH       | 78                   |
| 16                        | [RhCp*Cl <sub>2</sub> ] <sub>2</sub>                 | Cu(OAc) <sub>2</sub> ·H <sub>2</sub> O    | HFIP        | AcOH       | 74                   |
| 17                        | [RhCp*Cl <sub>2</sub> ] <sub>2</sub>                 | Cu(OAc) <sub>2</sub> ·H <sub>2</sub> O    | HFIP        | NaOAc      | 67                   |
| 18                        | [RhCp*Cl <sub>2</sub> ] <sub>2</sub>                 | Cu(OAc) <sub>2</sub> ·H <sub>2</sub> O    | HFIP        | KOAc       | 65                   |
| 19                        | -                                                    | Cu(OAc) <sub>2</sub> ·H <sub>2</sub> O    | HFIP        | ADA        | NR                   |
| 20                        | [RhCp*Cl <sub>2</sub> ] <sub>2</sub>                 | -                                         | HFIP        | ADA        | 32                   |

<sup>a</sup>Reaction conditions: **1a** (0.24 mmol), **2a** (0.97 mmol, 4 equiv.), catalyst (5 mol %), oxidant (2 equiv), additive (1 equiv), solvent (2 mL) in a sealed tube at 100 °C for 24 h. <sup>b</sup>Isolated yield. <sup>c</sup>Using **2a** (3 equiv.), **3aa** obtained in 66% yield. <sup>d</sup>Using **2a** (1 equiv.), **3aa** obtained in 28% yield. <sup>e</sup>Under N<sub>2</sub>, **3aa** obtained in 53% yield.

### 3. General procedure for the synthesis of **3**.

A 10 mL oven-dried sealed tube was charged with compounds **1** (0.24 mmol) and **2** (0.97 mmol), Cu(OAc)<sub>2</sub>·H<sub>2</sub>O (0.48 mmol), Ad-COOH (0.24 mmol), [RhCp\*Cl<sub>2</sub>]<sub>2</sub> (0.012 mmol, 5 mol %) and HFIP (2 mL) at room temperature. The reaction tube was capped tightly, and the reaction mixture was stirred at 100 °C in an oil bath for 24 h. The reaction mixture was cooled, diluted with water (5 mL), and then extracted with ethyl acetate (3 × 5 mL). The combined organic layer was dried over anhydrous Na<sub>2</sub>SO<sub>4</sub> and concentrated under reduced pressure. The resulting crude mixture was purified by column chromatography (silica gel 100–200 mesh) using EtOAc-hexanes as an eluent to afford the desired product.

### 4. General procedure for the synthesis of **5**.

A 10 mL oven-dried sealed tube was charged with compounds **4** (0.25 mmol) and **2** (0.77 mmol), Cu(OAc)<sub>2</sub>·H<sub>2</sub>O (0.51 mmol), Ad-COOH (0.25 mmol), [RhCp\*Cl<sub>2</sub>]<sub>2</sub> (0.012 mmol, 5 mol %) and DCE (2 mL) at room temperature. The reaction tube was capped tightly, and the reaction mixture was stirred at 80 °C in an oil bath for 16 h. The reaction mixture was cooled, diluted with water (5 mL), and then extracted with ethyl acetate (3 × 5 mL). The combined organic layer was dried over anhydrous Na<sub>2</sub>SO<sub>4</sub> and concentrated under reduced pressure. The resulting crude mixture was purified by column chromatography (silica gel 100–200 mesh) using EtOAc-hexanes as an eluent to afford the desired product.

### 5. Gram scale synthesis of **3aa**.

An oven-dried sealed tube was charged with compound **1a** (1 g, 4.85 mmol) and **2a** (1.12 g, 19.41 mmol), Cu(OAc)<sub>2</sub>·H<sub>2</sub>O (1.931 g, 9.70 mmol), Ad-COOH (881 mg, 4.85 mmol), followed by [RhCp\*Cl<sub>2</sub>]<sub>2</sub> (150 mg, 0.24 mmol, 5 mol %) in HFIP (8 mL) at room temperature, and the reaction mixture was stirred at 100 °C in an oil bath for 24 h. After completion of the reaction (monitored by TLC), the reaction mixture was allowed to attain room temperature. The reaction mixture was poured into water (50 mL) and extracted with ethyl acetate (3 × 30 mL). The combined organic layer was dried over anhydrous Na<sub>2</sub>SO<sub>4</sub> and evaporated under a vacuum. The resulting crude was purified by column chromatography (silica gel 100–200 mesh) using EtOAc-hexanes as an eluent to afford **3aa**.

### 6. Gram scale synthesis of **5aa**.

An oven-dried sealed tube was charged with compound **4a** (1 g, 5.15 mmol) and **2a** (897 mg, 15.46 mmol), Cu(OAc)<sub>2</sub>·H<sub>2</sub>O (2.05 g, 10.30 mmol), Ad-COOH (938 mg, 5.15 mmol),

followed by  $[\text{RhCp}^*\text{Cl}_2]_2$  (159 mg, 0.25 mmol, 5 mol %) in DCE (8 mL) at room temperature, and the reaction mixture was stirred at 80 °C in an oil bath for 24 h. After completion of the reaction (monitored by TLC), the reaction mixture was allowed to attain room temperature. The reaction mixture was poured into water (50 mL) and extracted with ethyl acetate (3 × 30 mL). The combined organic layer was dried over anhydrous  $\text{Na}_2\text{SO}_4$  and evaporated under a vacuum. The resulting crude was purified by column chromatography (silica gel 100-200 mesh) using EtOAc-hexanes as an eluent to afford **5aa**.

## 7. Deuterium Exchange Studies

**7.1. Deuterium exchange of 1b:** An oven-dried 10 mL pressure tube charged with **1b** (50 mg, 0.22 mmol),  $\text{Cu}(\text{OAc})_2 \cdot \text{H}_2\text{O}$  (90 mg, 0.45 mmol), Ad-COOH (41 mg, 0.22 mmol),  $[\text{RhCp}^*\text{Cl}_2]_2$  (7 mg, 0.011 mmol, 5 mol %) followed by  $\text{D}_2\text{O}$  (92  $\mu\text{L}$ , 5.68 mmol, 25 equiv.) in HFIP (2 mL) at room temperature. The reaction mixture was stirred at 100 °C in an oil bath for 24 h. After completion of the reaction, it was cooled to ambient temperature and extracted in ethyl acetate (3 × 5 mL). The combined organic layer was dried over  $\text{Na}_2\text{SO}_4$  and evaporated under reduced pressure. The resulting residue was purified by column chromatography on (100-200 mm) size silica gel using hexanes-EtOAc as eleuent. From,  $^1\text{H}$  NMR data of the product, 100% of deuterium incorporation was observed at both ortho C–H bonds of the 2-phenyl ring and 50% of deuterium incorporation was observed at the C3-position.

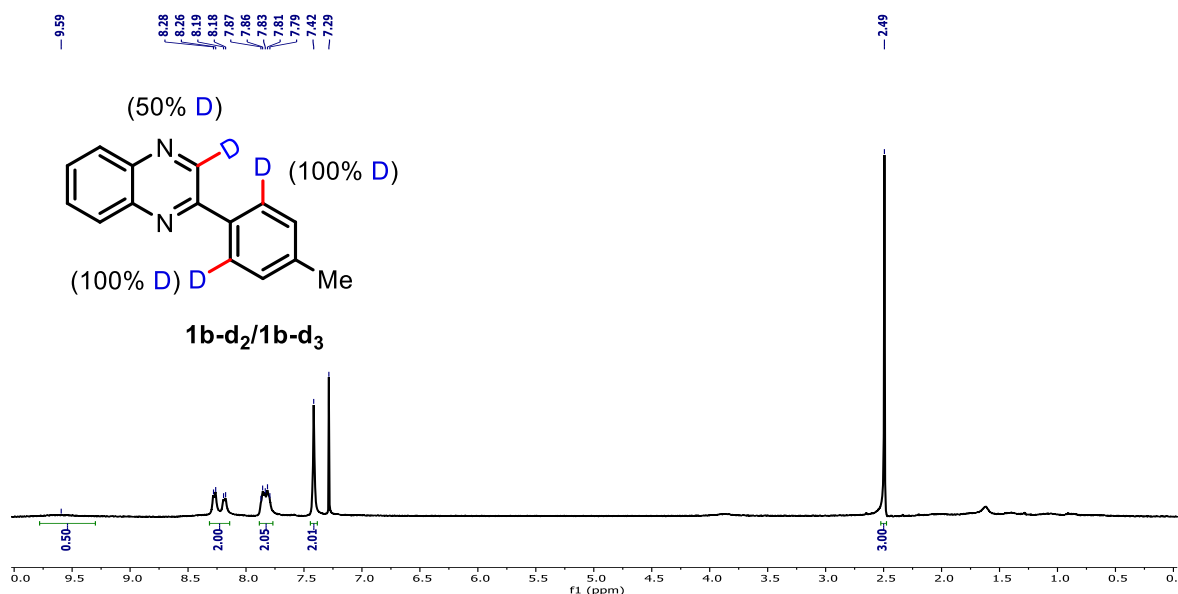

**7.2 Deuterium exchange of 4a:** An oven-dried 10 mL pressure tube charged with **4a** (50 mg, 0.25 mmol),  $\text{Cu}(\text{OAc})_2 \cdot \text{H}_2\text{O}$  (102 mg, 0.51 mmol), Ad-COOH (47 mg, 0.25 mmol),  $[\text{RhCp}^*\text{Cl}_2]_2$  (7 mg, 0.012 mmol, 5 mol %) followed by  $\text{D}_2\text{O}$  (116  $\mu\text{L}$ , 6.44 mmol, 25 equiv.) in DCE (2 mL) at room temperature. The reaction mixture was stirred at 80 °C in an oil bath



for 16 h. After completion of the reaction, it was cooled to ambient temperature, and extracted in ethyl acetate ( $3 \times 5$  mL). The combined organic layer was dried over  $\text{Na}_2\text{SO}_4$  and evaporated under reduced pressure. The resulting residue was purified by column chromatography (100-200 mm) size silica gel using EtOAc-hexanes as eluent.  $^1\text{H}$  NMR analysis of isolated product indicated 85% of deuterium incorporation at both ortho C-H bonds of the 2-phenyl ring, and 35% of deuterium incorporation at the C3-position.

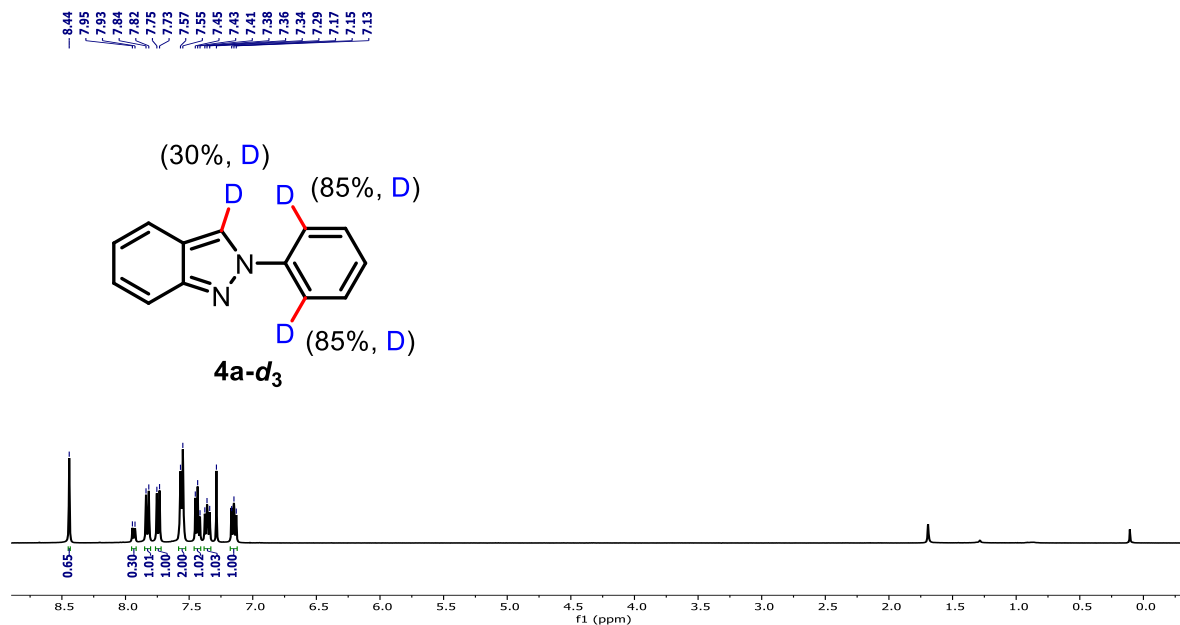

### 7.3. Deuterium exchange of **1b** in the presence of **2a**.

Procedure was similar as mentioned in section 7.1 except **2a** (58 mg, 0.90 mmol) also taken in the reaction mixture

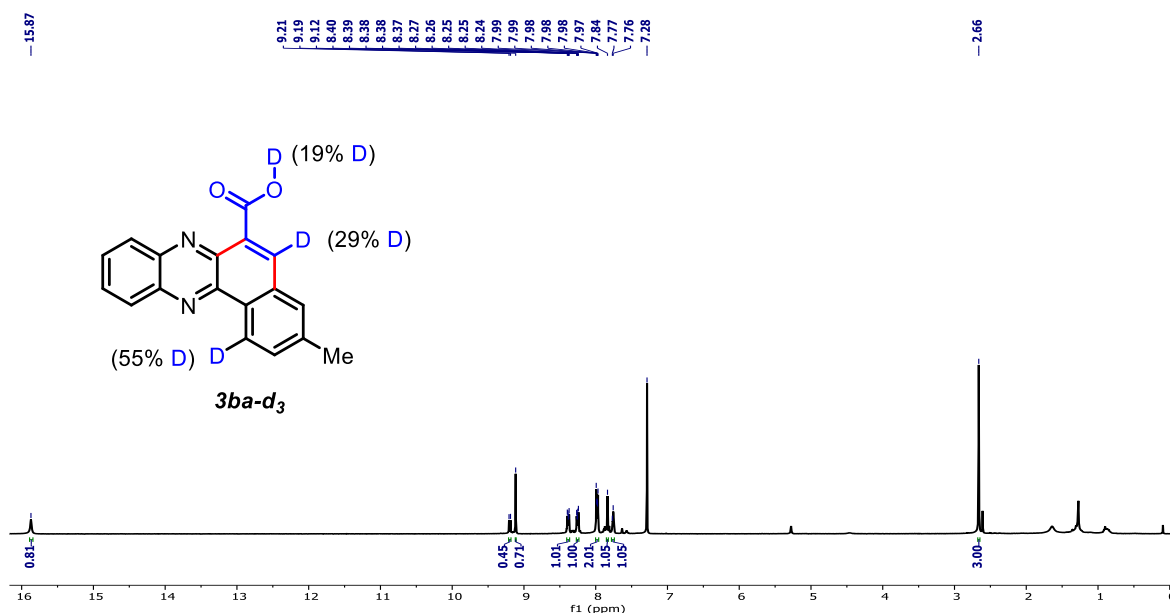

## 7.4. Deuterium exchange of 4a in the presence of 2a.

Procedure was similar as mentioned in section 7.2 except **2a** (58 mg, 0.90 mmol) also taken in the reaction mixture

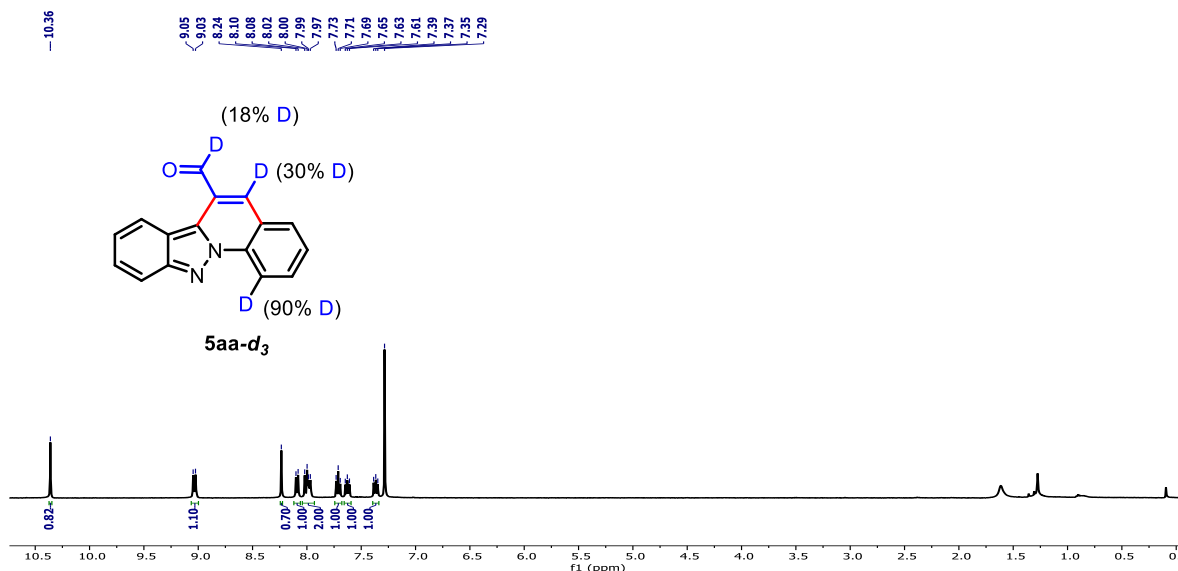

## 8. Intermediate isolation.

**8.1 Experimental procedure for of 6ab:** An oven-dried 10 mL pressure tube was charged with **1a** (50 mg, 0.24 mmol), **2b** (70 mg, 0.97 mmol), Cu(OAc)<sub>2</sub>·H<sub>2</sub>O (96 mg, 0.48 mmol), Ad-COOH (44 mg, 0.24 mmol), [RhCp\*Cl<sub>2</sub>]<sub>2</sub> (7 mg, 0.012 mmol, 5 mol %) in HFIP (2 mL) at room temperature. The reaction mixture was stirred at 60 °C in an oil bath for 4 h. After that the reaction mixture was cooled to ambient temperature, quenched with water, and extracted in ethyl acetate (3 × 5 mL). The combined organic layer was dried over Na<sub>2</sub>SO<sub>4</sub> and evaporated under reduced pressure. The resulting residue was purified by column chromatography using hexanes/EtOAc as eluent on (100-200 mm) size silica gel to afford the product **6ab** with 68% yield.

**8.2 Experimental procedure for isolation of 7ac:** An oven-dried 10 mL pressure tube charged with **4a** (50 mg, 0.25 mmol), **2c** (66 mg, 0.77 mmol) Cu(OAc)<sub>2</sub>·H<sub>2</sub>O (102 mg, 0.51 mmol), Ad-COOH (47 mg, 0.25 mmol), [RhCp\*Cl<sub>2</sub>]<sub>2</sub> (8 mg, 0.012 mmol, 5 mol %) in DCE (2 mL) at room temperature. The reaction mixture was stirred at 60 °C in an oil bath for 4 h. After that the reaction mixture was cooled to ambient temperature, quenched with water, and extracted in ethyl acetate (3 × 5 mL). The combined organic layer was dried over Na<sub>2</sub>SO<sub>4</sub> and evaporated under reduced pressure. The resulting residue was purified by column chromatography using hexanes/EtOAc as eluent on (100-200 mm) size silica gel to afford the product **7ac** with 71% yield.

## 9. Competition experiment.

**9.1 Experimental procedure for competition between 1b and 1f:** A 10 mL oven-dried sealed tube was charged with **1b** (30 mg, 0.13 mmol), **1f** (30 mg, 0.13 mmol), **2a** (31 mg, 0.54 mmol), Cu(OAc)<sub>2</sub>·H<sub>2</sub>O (54 mg, 0.27 mmol), Ad-COOH (25 mg, 0.13 mmol), [RhCp\*Cl<sub>2</sub>]<sub>2</sub> (4 mg, 0.006 mmol, 5 mol %) in HFIP (2 mL) at room temperature. The reaction tube was capped tightly and stirred at 100 °C in an oil bath for 24 h. After completion of the reaction, it was cooled to ambient temperature, quenched with water, and extracted in ethyl acetate (5 mL × 3). The combined organic layer was dried over Na<sub>2</sub>SO<sub>4</sub> and evaporated under reduced pressure. The resulting residue was purified through a filter column chromatography on silica gel (100-200) to afford the mixture of products **3ba** and **3fa**, which on <sup>1</sup>H NMR analysis indicated formation of **3ba** and **3fa** in 3: 1 ratio.

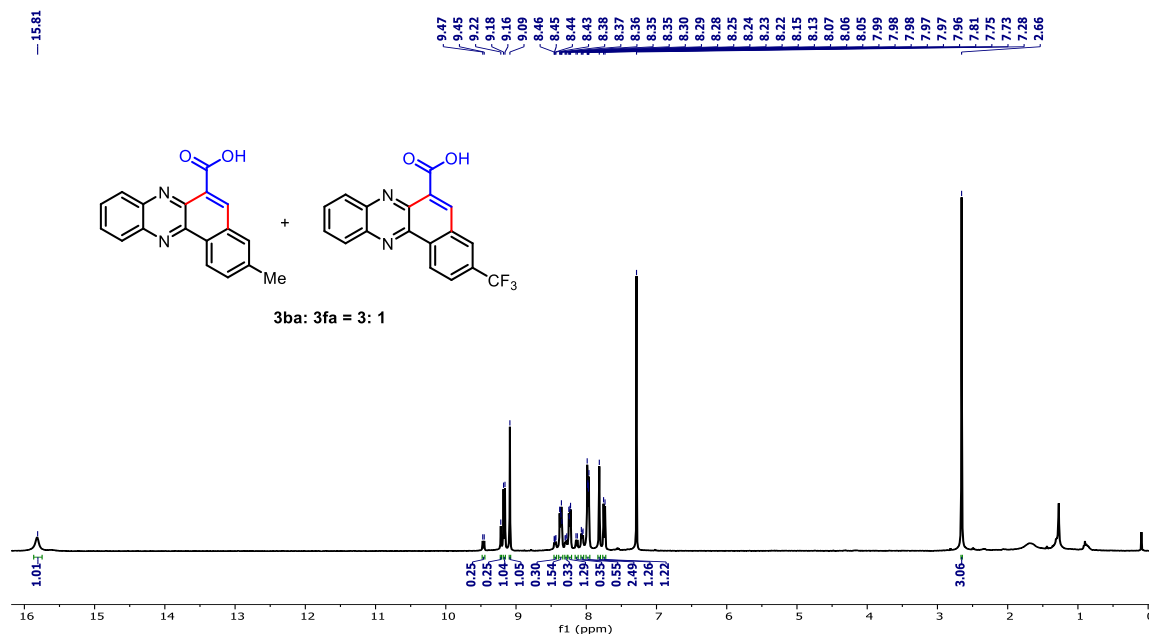

**9.2 Experimental procedure for competition between 4c and 4f:** A 10 mL oven-dried sealed tube was charged with compounds **4c** (30 mg, 0.13 mmol), **4f** (30 mg, 0.13 mmol), allyl alcohol **2a** (23 mg, 0.40 mmol), Cu(OAc)<sub>2</sub>·H<sub>2</sub>O (53 mg, 0.26 mmol), Ad-COOH (24 mg, 0.13 mmol), [RhCp\*Cl<sub>2</sub>]<sub>2</sub> (4 mg, 0.006 mmol, 5 mol %) in DCE (2 mL) at room temperature. The reaction tube was capped tightly and stirred at 80 °C in an oil bath for 16 h. After completion of the reaction, it was cooled to ambient temperature, quenched with water, and extracted in ethyl acetate (5 mL × 3). The combined organic layer was dried over Na<sub>2</sub>SO<sub>4</sub> and evaporated under reduced pressure. The resulting residue was purified by through filter column chromatography using hexanes/EtOAc as eluent on silica gel (100-200 mesh size) to afford the mixture of products **5ca** and **5fa** in 3: 1 as predicted by <sup>1</sup>H NMR of the mixture.

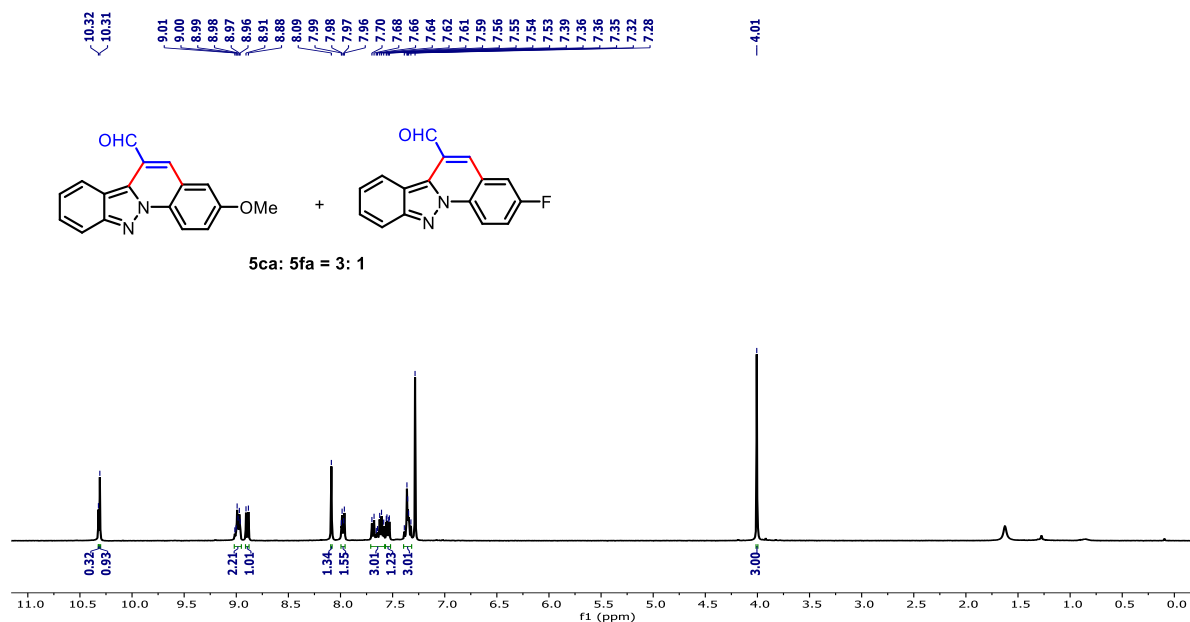

## 10. HRMS of rhodacycle intermediate C and intermediate E.

MS Zoomed Spectrum

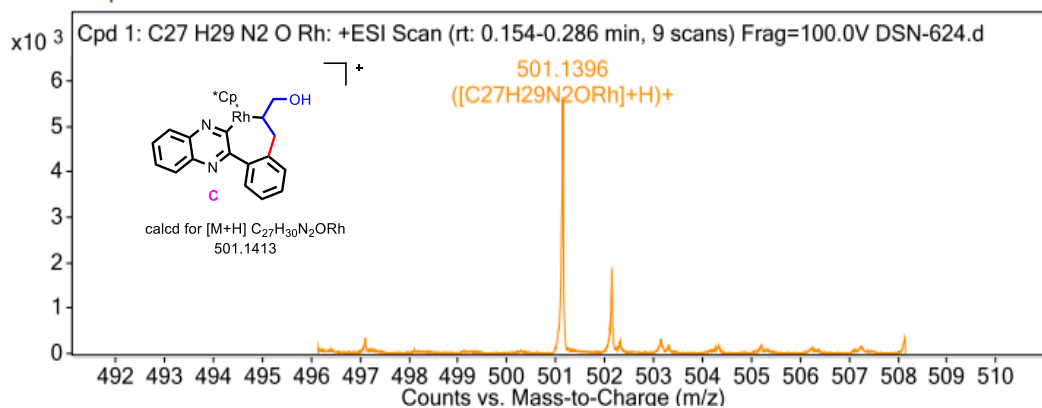

MS Zoomed Spectrum

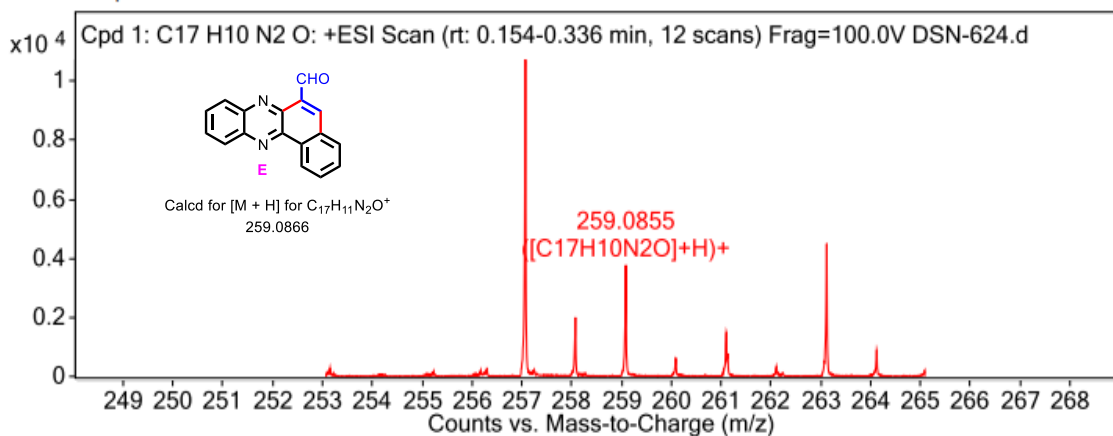

## 11. Optimization of reaction conditions for 5aa.

**Table S2:** Selected experiments for optimization of reaction conditions for 5aa.<sup>a</sup>

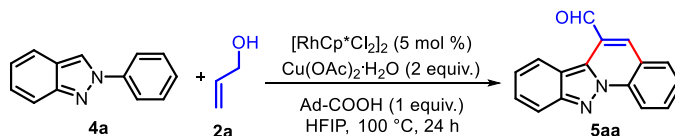

| Entry    | Variation from standard conditions                                 | % Yield 5aa <sup>b</sup> |
|----------|--------------------------------------------------------------------|--------------------------|
| 1        | none                                                               | 38                       |
| 2        | 80 °C and 24 h                                                     | 49                       |
| 3        | 80 °C and 16 h                                                     | 58                       |
| 4        | 60 °C and 16 h                                                     | 46                       |
| 5        | toluene as solvent                                                 | 63                       |
| <b>6</b> | <b>DCE as solvent</b>                                              | <b>72</b>                |
| 7        | 2 equivalent of 2a                                                 | 57                       |
| 8        | 3 equivalent of 2a                                                 | 71                       |
| 9        | [Ru( <i>p</i> -cymene)Cl <sub>2</sub> ] <sub>2</sub> as a catalyst | Trace                    |
| 10       | Pd(OAc) <sub>2</sub> as a catalyst                                 | NR                       |
| 11       | [CoCp*(CO)I <sub>2</sub> ]                                         | 21                       |

<sup>a</sup>Reaction conditions: **1a** (0.25 mmol), **2a** (0.77 mmol), catalyst (5 mol %), oxidant (2 equiv.), additive (1 equiv.), solvent (2 mL) in a sealed tube at 80 °C for 16 h, <sup>b</sup>Isolated yield.

## 12. Physical and spectral data of 3aa-5hb, 6ab, 7ac, 8, 9, 10, 11 and 12

**Benzo[*a*]phenazine-6-carboxylic acid (3aa):** The title compound was purified by column chromatography on silica gel using EtOAc/hexanes (1: 4, *v/v*) as an eluent; yellow solid (54 mg, 81%); mp = 272-274 °C (Lit. mp 274-276 °C)<sup>3</sup>; <sup>1</sup>H NMR (400 MHz, CDCl<sub>3</sub>) δ 15.88 (s, 1H), 9.42 (d, *J* = 8.0 Hz, 1H), 9.25 (s, 1H), 8.45 (dd, *J* = 6.4, 3.6 Hz, 1H), 8.33 – 8.30 (m, 1H), 8.14 (d, *J* = 7.6 Hz, 1H), 8.04 – 7.97 (m, 3H), 7.94 – 7.91 (m, 1H); <sup>13</sup>C{<sup>1</sup>H} NMR (100 MHz, CDCl<sub>3</sub>) δ 166.4, 142.8, 142.2, 141.8, 140.3, 138.4, 132.4, 132.1, 131.3, 131.2, 131.1, 130.9, 130.8, 129.1, 127.6, 125.5, 121.9; HRMS (ESI) *m/z*: [M + H]<sup>+</sup> Calcd for C<sub>17</sub>H<sub>11</sub>N<sub>2</sub>O<sub>2</sub><sup>+</sup> 275.0810; Found 275.0812.

**3-Methylbenzo[*a*]phenazine-6-carboxylic acid (3ba):** The title compound was purified by column chromatography on silica gel using EtOAc/hexanes (1: 4, *v/v*) as an eluent; yellow solid (56 mg, 86%); mp = 276-278 °C; <sup>1</sup>H NMR (400 MHz, CDCl<sub>3</sub>) δ 15.94 (s, 1H), 9.28 (d, *J* = 8.2 Hz, 1H), 9.19 (s, 1H), 8.45 – 8.42 (m, 1H), 8.31 – 8.29 (m, 1H), 8.02 – 7.99 (m, 2H), 7.90 (s, 1H), 7.81 (d, *J* = 8.4 Hz, 1H), 2.69 (s, 3H); <sup>13</sup>C{<sup>1</sup>H} NMR (100 MHz, CDCl<sub>3</sub>) δ 166.5, 142.9, 142.2, 141.8, 141.6, 140.2, 138.2, 132.7, 131.8, 131.5, 131.1, 130.6, 130.1, 129.9, 127.6, 125.5, 121.8, 21.8; HRMS (ESI) *m/z*: [M + H]<sup>+</sup> Calcd for C<sub>18</sub>H<sub>13</sub>N<sub>2</sub>O<sub>2</sub><sup>+</sup> 289.0972; Found 289.0981.

**3-Methoxybenzo[*a*]phenazine-6-carboxylic acid (3ca):** The title compound was purified by column chromatography on silica gel using EtOAc/hexanes (1: 3, *v/v*) as an eluent; yellow solid (43 mg, 67%); mp = 268-270 °C; <sup>1</sup>H NMR (400 MHz, CDCl<sub>3</sub>) δ 15.98 (s, 1H), 9.31 (d, *J* = 8.8 Hz, 1H), 9.18 (s, 1H), 8.42 – 8.40 (m, 1H), 8.29 – 8.27 (m, 1H), 8.01 – 7.96 (m, 2H), 7.56 (dd, *J* = 8.8, 2.4 Hz, 1H), 7.48 (d, *J* = 2.0 Hz, 1H), 4.06 (s, 3H); <sup>13</sup>C{<sup>1</sup>H} NMR (100 MHz, CDCl<sub>3</sub>) δ 166.5, 161.7, 142.8, 142.4, 141.5, 139.7, 137.9, 133.1, 131.5, 131.2, 129.8, 127.6, 127.4, 126.2, 122.4, 120.6, 111.6, 55.8; HRMS (ESI) *m/z*: [M + H]<sup>+</sup> Calcd for C<sub>18</sub>H<sub>13</sub>N<sub>2</sub>O<sub>3</sub><sup>+</sup> 305.0921; Found 305.0924.

**3-Chlorobenzo[*a*]phenazine-6-carboxylic acid (3da):** The title compound was purified by column chromatography on silica gel using EtOAc/hexanes (1: 4, *v/v*) as an eluent; yellow solid (40 mg, 62%); mp = 282-284 °C; <sup>1</sup>H NMR (400 MHz, CDCl<sub>3</sub>) δ 15.81 (s, 1H), 9.39 (d, *J* = 8.8 Hz, 1H), 9.18 (s, 1H), 8.47 (dd, *J* = 6.6, 3.4 Hz, 1H), 8.34 (dd, *J* = 6.6, 3.4 Hz, 1H), 8.12 (d, *J* = 2.0 Hz, 1H), 8.06 (dd, *J* = 6.6, 3.4 Hz, 1H), 7.95 – 7.93 (m, 1H); <sup>13</sup>C{<sup>1</sup>H} NMR (100 MHz, CDCl<sub>3</sub>) δ 165.9, 142.4, 142.3, 140.3, 140.0, 138.6, 137.2, 132.4, 131.6, 131.4, 130.7, 130.0, 129.7, 127.7, 127.2, 123.3; HRMS (ESI) *m/z*: [M+H]<sup>+</sup> Calcd for C<sub>17</sub>H<sub>10</sub>ClN<sub>2</sub>O<sub>2</sub><sup>+</sup> 309.0425; Found 309.0421.

**3-Bromobenzo[*a*]phenazine-6-carboxylic acid (3ea):** The title compound was purified by column chromatography on silica gel using EtOAc/hexanes (1: 4, *v/v*) as an eluent; yellow solid (42 mg, 68%); mp = 272-274 °C; <sup>1</sup>H NMR (400 MHz, CDCl<sub>3</sub>) δ 15.80 (s, 1H), 9.31 (d, *J* = 8.6 Hz, 1H), 9.18 (s, 1H), 8.48 – 8.46 (m, 1H), 8.35 – 8.33 (m, 1H), 8.29 (d, *J* = 3.6 Hz, 1H), 8.10 – 8.04 (m, 3H); <sup>13</sup>C{<sup>1</sup>H} NMR (100 MHz, CDCl<sub>3</sub>) δ 165.8, 140.2, 140.0, 138.6, 134.1, 132.8, 132.6, 132.4, 131.6, 131.2, 131.0, 130.9, 130.8, 130.0, 127.7, 127.2, 125.6; HRMS (ESI) *m/z*: [M + H]<sup>+</sup> Calcd for C<sub>17</sub>H<sub>10</sub>N<sub>2</sub>BrN<sub>2</sub>O<sub>2</sub><sup>+</sup> 352.9920; Found 352.9923.

**3-(Trifluoromethyl)benzo[*a*]phenazine-6-carboxylic acid (3fa):** The title compound was purified by column chromatography on silica gel using EtOAc/hexanes (1: 3, *v/v*) as an eluent; Yellow solid (47 mg, 76%); mp = 244-246 °C; <sup>1</sup>H NMR (400 MHz, CDCl<sub>3</sub>) δ 15.71 (s, 1H), 9.56 (d, *J* = 8.4 Hz, 1H), 9.29 (s, 1H), 8.52 – 8.49 (m, 1H), 8.41 (s, 1H), 8.38 – 8.34 (m, 1H), 8.19 (d, *J* = 8.4 Hz, 1H), 8.13 – 8.04 (m, 2H); <sup>13</sup>C{<sup>1</sup>H} NMR (100 MHz, CDCl<sub>3</sub>) δ 165.6, 142.5, 141.8, 140.6, 140.4, 138.9, 134.6, 133.0, 132.7 (q, <sup>2</sup>*J*<sub>C-F</sub> = 31.6 Hz), 131.8, 131.0, 130.1, 127.7, 127.6 (q, <sup>4</sup>*J*<sub>C-F</sub> = 4.5 Hz), 126.9 (q, <sup>4</sup>*J*<sub>C-F</sub> = 3.5 Hz), 126.5, 123.5, 123.7 (q, <sup>1</sup>*J*<sub>C-F</sub> = 279.3 Hz); HRMS (ESI) *m/z*: [M + H]<sup>+</sup> Calcd for C<sub>18</sub>H<sub>10</sub>F<sub>3</sub>N<sub>2</sub>O<sub>2</sub><sup>+</sup> 343.0689; Found 343.0693.

**1-Methylbenzo[*a*]phenazine-6-carboxylic acid (3ga):** The title compound was purified by column chromatography on silica gel using EtOAc/hexanes (1: 4, *v/v*) as an eluent; yellow solid (45 mg, 69%); mp = 254-258 °C; <sup>1</sup>H NMR (400 MHz, CDCl<sub>3</sub>) δ 16.07 (s, 1H), 9.15 (s, 1H), 8.41 – 8.38 (m, 1H), 8.26 – 8.23 (m, 1H), 8.01 – 7.95 (m, 3H), 7.78 – 7.73 (m, 2H), 3.38 (s, 3H); <sup>13</sup>C{<sup>1</sup>H} NMR (100 MHz, CDCl<sub>3</sub>) δ 166.3, 145.2, 143.0, 141.1, 140.7, 140.6, 136.4,

135.4, 132.5, 131.9, 130.7, 130.0, 129.95, 129.94, 129.92, 127.2, 121.4, 26.6; HRMS (ESI)  $m/z$ :  $[M + H]^+$  Calcd for  $C_{18}H_{13}N_2O_2^+$  289.0972; Found 289.0983.

**1-Methoxybenzo[*a*]phenazine-6-carboxylic acid (3ha):** The title compound was purified by column chromatography on silica gel using EtOAc/hexanes (1: 3 *v/v*) as an eluent; yellow solid (50 mg, 78%); mp = 276-278 °C;  $^1H$  NMR (400 MHz,  $CDCl_3$ )  $\delta$  9.20 (s, 1H), 8.48 (dd,  $J = 6.6, 3.2$  Hz, 1H), 8.28 (dd,  $J = 6.5, 3.3$  Hz, 1H), 8.02 – 7.98 (m, 2H), 7.87 (t,  $J = 7.9$  Hz, 1H), 7.77 (d,  $J = 7.4$  Hz, 1H), 7.54 (d,  $J = 8.0$  Hz, 1H), 4.29 (s, 3H);  $^{13}C\{^1H\}$  NMR (100 MHz,  $CDCl_3$ )  $\delta$  166.3, 160.0, 144.0, 142.5, 141.8, 140.2, 136.4, 133.6, 132.0, 131.4, 130.8, 130.3, 127.1, 124.1, 122.2, 120.7, 114.6, 56.8; HRMS (ESI)  $m/z$ :  $[M + H]^+$  Calcd for  $C_{18}H_{13}N_2O_3^+$  305.0921; Found 305.0918.

**2-(Trifluoromethyl)benzo[*a*]phenazine-6-carboxylic acid (3ia):** The title compound was purified by column chromatography on silica gel using EtOAc/hexanes (1: 3 *v/v*) as an eluent; yellow solid (42 mg, 67%); mp = 264-266 °C;  $^1H$  NMR (400 MHz,  $CDCl_3$ )  $\delta$  15.80 (s, 1H), 9.72 (s, 1H), 9.29 (s, 1H), 8.53 (dd,  $J = 6.6, 3.4$  Hz, 1H), 8.37 (dd,  $J = 6.4, 3.6$  Hz, 1H), 8.29 (d,  $J = 8.4$  Hz, 1H), 8.14 – 8.07 (m, 3H);  $^{13}C\{^1H\}$  NMR (100 MHz,  $CDCl_3$ : DMSO)  $\delta$  166.3, 142.4, 142.0, 140.2, 139.9, 138.9, 133.1, 132.9, 132.6, 132.3, 131.9, 131.4, 129.9, 127.6, 126.8 (q,  $^4J_{C-F} = 3.0$  Hz), 123.8 (q,  $^1J_{C-F} = 271.2$  Hz), 123.7, 122.7 (q,  $^4J_{C-F} = 4.1$  Hz); HRMS (ESI)  $m/z$ :  $[M + H]^+$  Calcd for  $C_{18}H_{10}F_3N_2O_2^+$  343.0689; Found 343.0687.

**10-Chlorobenzo[*a*]phenazine-6-carboxylic acid (3ja):** The title compound was purified by column chromatography on silica gel using EtOAc/hexanes (1: 4, *v/v*) as an eluent; yellow solid (50 mg, 78%); mp = 276-278 °C;  $^1H$  NMR (400 MHz,  $CDCl_3$ )  $\delta$  15.50 (s, 1H), 9.37 (d,  $J = 7.6$  Hz, 1H), 9.25 (s, 1H), 8.44 (d,  $J = 2.0$  Hz, 1H), 8.26 (d,  $J = 8.8$  Hz, 1H), 8.14 (d,  $J = 8.0$  Hz, 1H), 8.02 – 7.98 (m, 1H), 7.96 – 7.92 (m, 2H);  $^{13}C\{^1H\}$  NMR (100 MHz,  $CDCl_3$ )  $\delta$  166.1, 143.4, 142.3, 142.2, 140.3, 137.4, 136.9, 133.3, 132.1, 131.5, 131.3, 131.31, 130.9, 128.8, 128.5, 125.7, 121.8; HRMS (ESI)  $m/z$ :  $[M + H]^+$  Calcd for  $C_{17}H_{10}ClN_2O_2^+$  309.0425; Found 309.0431.

**10-Bromobenzo[*a*]phenazine-6-carboxylic acid (3ka):** The title compound was purified by column chromatography on silica gel using EtOAc/hexanes (1: 4, *v/v*) as an eluent; yellow solid (52 mg, 84%); mp = 262-264 °C;  $^1H$  NMR (400 MHz,  $CDCl_3$ )  $\delta$  15.50 (s, 1H), 9.36 (d,  $J = 8.0$  Hz, 1H), 9.26 (s, 1H), 8.63 (d,  $J = 2.0$  Hz, 1H), 8.16 (dd,  $J = 17.0, 8.6$  Hz, 2H), 8.07 (dd,  $J = 9.2, 2.0$  Hz, 1H), 8.02 – 7.98 (m, 1H), 7.96 – 7.92 (m, 1H);  $^{13}C\{^1H\}$  NMR (100 MHz,  $CDCl_3 + MeOH$ )  $\delta$  166.3, 143.3, 142.4, 142.3, 140.3, 137.1, 135.7, 132.1, 131.9, 131.5, 131.3, 130.9, 128.7, 125.69, 125.67, 121.6; HRMS (ESI)  $m/z$ :  $[M + H]^+$  Calcd for  $C_{17}H_{10}N_2BrN_2O_2^+$  352.9920; Found 352.9904.

**10-Fluorobenzo[*a*]phenazine-6-carboxylic acid (3la):** The title compound was purified by column chromatography on silica gel using EtOAc/hexanes (1: 2.3, *v/v*) as an eluent; yellow solid (48 mg, 74%); mp = 288-290 °C;  $^1H$  NMR (400 MHz,  $CDCl_3$ )  $\delta$  15.53 (s, 1H), 9.40 (d,

$J = 7.6$  Hz, 1H), 9.24 (s, 1H), 8.34 (dd,  $J = 9.0, 5.4$  Hz, 1H), 8.14 (d,  $J = 7.2$  Hz, 1H), 8.06 (dd,  $J = 8.8, 2.4$  Hz, 1H), 8.01 (t,  $J = 7.2$  Hz, 1H), 7.95 (t,  $J = 7.0$  Hz, 1H), 7.85 – 7.80 (m, 1H);  $^{13}\text{C}\{^1\text{H}\}$  NMR (100 MHz,  $\text{CDCl}_3 + \text{MeOH}$ )  $\delta$  166.48, 163.45 (d,  $^1J_{\text{C-F}} = 255.2$  Hz), 143.27, 142.84 (d,  $^3J_{\text{C-F}} = 13.6$  Hz), 141.84 (d,  $^4J_{\text{C-F}} = 1.4$  Hz), 139.70 (d,  $^4J_{\text{C-F}} = 3.1$  Hz), 135.74, 131.98, 131.48, 131.30, 131.25, 130.83, 129.82 (d,  $^3J_{\text{C-F}} = 10.3$  Hz), 125.66, 123.49 (d,  $^2J_{\text{C-F}} = 27.3$  Hz), 121.58, 112.74 (d,  $^2J_{\text{C-F}} = 21.3$  Hz); HRMS (ESI)  $m/z$ :  $[\text{M} + \text{H}]^+$  Calcd for  $\text{C}_{17}\text{H}_{10}\text{FN}_2\text{O}_2^+$  293.0721; Found 293.0727.

**9,10-Dimethylbenzo[*a*]phenazine-6-carboxylic acid (3ma):** The title compound was purified by column chromatography on silica gel using EtOAc/hexanes (1: 4,  $v/v$ ) as an eluent; yellow solid (53 mg, 82%); mp = 258-260 °C;  $^1\text{H}$  NMR (400 MHz,  $\text{CDCl}_3$ )  $\delta$  16.02 (s, 1H), 9.29 (d,  $J = 8.0$  Hz, 1H), 9.14 (s, 1H), 8.09 (d,  $J = 8.4$  Hz, 2H), 7.94 (t,  $J = 7.0$  Hz, 2H), 7.87 (t,  $J = 7.2$  Hz, 1H), 2.61 (s, 6H);  $^{13}\text{C}\{^1\text{H}\}$  NMR (100 MHz,  $\text{CDCl}_3$ )  $\delta$  166.7, 143.8, 142.6, 141.8, 141.4, 140.6, 139.3, 137.4, 132.5, 131.1, 130.7, 130.5, 130.4, 128.4, 126.1, 125.2, 121.8, 20.8, 20.7; HRMS (ESI)  $m/z$ :  $[\text{M} + \text{H}]^+$  Calcd for  $\text{C}_{19}\text{H}_{15}\text{N}_2\text{O}_2^+$  303.1128; Found 303.1139.

**9,10-Dichlorobenzo[*a*]phenazine-6-carboxylic acid (3na):** The title compound was purified by column chromatography on silica gel using EtOAc/hexanes (1: 3,  $v/v$ ) as an eluent; yellow solid (37 mg, 59%); mp = 282-284 °C;  $^1\text{H}$  NMR (400 MHz,  $\text{CDCl}_3$ )  $\delta$  15.26 (s, 1H), 9.37 (d,  $J = 7.2$  Hz, 1H), 9.29 (s, 1H), 8.60 (s, 1H), 8.47 (s, 1H), 8.16 (d,  $J = 8.4$  Hz, 1H), 8.03 (t,  $J = 7.6$  Hz, 1H), 7.97 (t,  $J = 7.0$  Hz, 1H);  $^{13}\text{C}\{^1\text{H}\}$  NMR (100 MHz,  $\text{CDCl}_3$ )  $\delta$  165.8, 143.5, 143.0, 141.0, 140.6, 137.3, 137.1, 136.4, 132.1, 131.54, 131.50, 131.0, 130.2, 128.0, 125.8, 121.8; HRMS (ESI)  $m/z$ :  $[\text{M} + \text{H}]^+$  Calcd for  $\text{C}_{17}\text{H}_9\text{Cl}_2\text{N}_2\text{O}_2^+$  343.0036; Found 343.0027.

**Thieno[3,2-*a*]phenazine-5-carboxylic acid (3oa):** The title compound was purified by column chromatography on silica gel using EtOAc/hexanes (1: 4,  $v/v$ ) as an eluent; yellow solid (56 mg, 84%); mp = 248-250 °C;  $^1\text{H}$  NMR (400 MHz,  $\text{CDCl}_3$ )  $\delta$  15.77 (s, 1H), 9.30 (s, 1H), 8.49 (d,  $J = 5.2$  Hz, 1H), 8.37 – 8.34 (m, 1H), 8.27 – 8.23 (m, 1H), 8.03 – 7.97 (m, 3H);  $^{13}\text{C}\{^1\text{H}\}$  NMR (100 MHz,  $\text{CDCl}_3$ )  $\delta$  166.2, 142.5, 140.2, 140.1, 139.3, 139.1, 138.4, 133.5, 132.7, 132.1, 131.4, 129.8, 127.7, 124.8, 120.1; HRMS (ESI)  $m/z$ :  $[\text{M} + \text{H}]^+$  Calcd for  $\text{C}_{15}\text{H}_9\text{N}_2\text{O}_2\text{S}^+$  281.0379; Found 281.0382.

**Naphtho[2,3-*a*]phenazine-6-carboxylic acid (3pa):** The title compound was purified by column chromatography on silica gel using EtOAc/hexanes (1: 3,  $v/v$ ) as an eluent; yellow solid (56 mg, 89%); mp = 274-276 °C;  $^1\text{H}$  NMR (400 MHz,  $\text{CDCl}_3$ )  $\delta$  15.84 (s, 1H), 9.72 (s, 1H), 9.21 (s, 1H), 8.49 (s, 1H), 8.43 – 8.41 (m, 1H), 8.25 – 8.20 (m, 2H), 8.11 (d,  $J = 7.7$  Hz, 1H), 8.03 – 7.95 (m, 2H), 7.78 – 7.69 (m, 2H);  $^{13}\text{C}\{^1\text{H}\}$  NMR (100 MHz,  $\text{CDCl}_3$ )  $\delta$  166.5, 144.0, 143.3, 141.7, 141.4, 137.9, 133.8, 133.7, 131.6, 131.4, 131.1, 129.7, 129.3, 128.8, 128.6, 128.5, 128.4, 128.1, 127.5, 126.0, 121.6; HRMS (ESI)  $m/z$ :  $[\text{M} + \text{H}]^+$  Calcd for  $\text{C}_{21}\text{H}_{13}\text{N}_2\text{O}_2^+$  325.0972; Found 325.0969.



**1-(Benzo[a]phenazin-6-yl)ethan-1-one (3ab):** The title compound was purified by column chromatography on silica gel using EtOAc/hexanes (1: 19, v/v) as an eluent; yellow solid (53 mg, 80%); mp = 188-190 °C; <sup>1</sup>H NMR (400 MHz, CDCl<sub>3</sub>) δ 9.36 (d, *J* = 7.6 Hz, 1H), 8.37 (s, 1H), 8.34 – 8.32 (m, 1H), 8.28 – 8.25 (m, 1H), 8.33, 7.98 (d, *J* = 7.2 Hz, 1H), 7.90 – 7.77 (m, 4H), 3.10 (s, 3H); <sup>13</sup>C{<sup>1</sup>H} NMR (100 MHz, CDCl<sub>3</sub>) δ 201.8, 142.0, 141.9, 141.5, 141.2, 137.0, 134.5, 132.4, 131.7, 130.4, 130.2, 130.1, 129.8, 129.6, 129.5, 125.4, 32.8; HRMS (ESI) *m/z*: [M + H]<sup>+</sup> Calcd for C<sub>18</sub>H<sub>13</sub>N<sub>2</sub>O<sup>+</sup> 273.1022; Found 273.1020.

**1-(Benzo[a]phenazin-6-yl)propan-1-one (3ac):** The title compound was purified by column chromatography on silica gel using EtOAc/hexanes (1: 19, v/v) as an eluent; yellow solid (54 mg, 78%); mp = 184-186 °C; <sup>1</sup>H NMR (400 MHz, CDCl<sub>3</sub>) δ 9.42 (d, *J* = 8.0 Hz, 1H), 8.39 – 8.36 (m, 1H), 8.32 (s, 1H), 8.31 – 8.28 (m, 1H), 8.02 (dd, *J* = 7.6, 0.8 Hz, 1H), 7.94 – 7.81 (m, 4H), 3.53 (q, *J* = 7.4 Hz, 2H), 1.37 (t, *J* = 7.2 Hz, 3H); <sup>13</sup>C{<sup>1</sup>H} NMR (100 MHz, CDCl<sub>3</sub>) δ 205.7, 142.1, 142.0, 141.6, 141.3, 137.6, 133.9, 132.2, 131.9, 130.4, 130.3, 130.2, 129.7, 129.64, 129.62, 129.4, 125.5, 38.1, 8.7; HRMS (ESI) *m/z*: [M + H]<sup>+</sup> Calcd for C<sub>19</sub>H<sub>15</sub>N<sub>2</sub>O<sup>+</sup> 287.1179; Found 287.1184.

**1-(3-Methylbenzo[a]phenazin-6-yl)ethan-1-one (3bb):** The title compound was purified by column chromatography on silica gel using EtOAc/hexanes (1: 19, v/v) as an eluent; yellow solid (55 mg, 84%); mp = 184-186 °C; <sup>1</sup>H NMR (400 MHz, CDCl<sub>3</sub>) δ 9.23 (d, *J* = 8.4 Hz, 1H), 8.33 – 8.31 (m, 2H), 8.27 – 8.25 (m, 1H), 7.91 – 7.84 (m, 2H), 7.75 (s, 1H), 7.67 (d, *J* = 8.4 Hz, 1H), 3.10 (s, 3H), 2.62 (s, 3H); <sup>13</sup>C{<sup>1</sup>H} NMR (100 MHz, CDCl<sub>3</sub>) δ 201.9, 142.2, 141.7, 141.1, 140.6, 137.0, 134.6, 131.8, 131.2, 130.3, 130.1, 130.0, 129.7, 129.6, 129.5, 125.4, 32.8, 21.7; HRMS (ESI) *m/z*: [M + H]<sup>+</sup> Calcd for C<sub>19</sub>H<sub>15</sub>N<sub>2</sub>O<sup>+</sup> 287.1179; Found 287.1186.

**1-(3-Methoxybenzo[a]phenazin-6-yl)ethan-1-one (3cb):** The title compound was purified by column chromatography on silica gel using EtOAc/hexanes (1: 19, v/v) as an eluent; yellow solid (48 mg, 75%); <sup>1</sup>H NMR (400 MHz, CDCl<sub>3</sub>) δ 9.29 (d, *J* = 8.8 Hz, 1H), 8.33 – 8.30 (m, 2H), 8.26 (d, *J* = 8.0 Hz, 1H), 7.90 – 7.83 (m, 2H), 7.44 (d, *J* = 8.9 Hz, 1H), 7.37 (s, 1H), 4.01 (s, 3H), 3.09 (s, 3H); <sup>13</sup>C{<sup>1</sup>H} NMR (100 MHz, CDCl<sub>3</sub>) δ 202.0, 161.2, 142.2, 141.7, 141.5, 140.6, 137.6, 134.2, 133.3, 130.4, 129.7, 129.6, 129.3, 127.3, 126.2, 119.0, 110.9, 55.7, 32.8; HRMS (ESI) *m/z*: [M + H]<sup>+</sup> Calcd for C<sub>19</sub>H<sub>15</sub>N<sub>2</sub>O<sub>2</sub><sup>+</sup> 303.1128; Found 303.1136.

**1-(3-Chlorobenzo[a]phenazin-6-yl)ethan-1-one (3db):** The title compound was purified by column chromatography on silica gel using EtOAc/hexanes (1: 19, v/v) as an eluent; yellow solid (43 mg, 67%); mp = 242-244 °C; <sup>1</sup>H NMR (400 MHz, CDCl<sub>3</sub>) δ 9.36 (d, *J* = 8.4 Hz, 1H), 8.37 (d, *J* = 7.6 Hz, 1H), 8.32 – 8.28 (m, 2H), 8.00 (s, 1H), 7.95 – 7.91 (m, 2H), 7.83 (d, *J* = 8.8 Hz, 1H), 3.10 (s, 3H); <sup>13</sup>C{<sup>1</sup>H} NMR (100 MHz, CDCl<sub>3</sub>) δ 201.7, 142.1, 141.7, 141.6, 140.9, 138.5, 136.4, 132.9, 132.8, 130.8, 130.7, 130.6, 129.9, 129.7, 129.6, 128.8, 127.1, 32.8; HRMS (ESI) *m/z*: [M + H]<sup>+</sup> Calcd for C<sub>18</sub>H<sub>12</sub>ClN<sub>2</sub>O<sup>+</sup> 307.0633; Found 307.0641.

**1-(3-Bromobenzo[*a*]phenazin-6-yl)ethan-1-one (3eb):** The title compound was purified by column chromatography on silica gel using EtOAc/hexanes (1: 19, *v/v*) as an eluent; yellow solid (43 mg, 69%); mp = 234-236 °C; <sup>1</sup>H NMR (400 MHz, CDCl<sub>3</sub>) δ 9.29 (d, *J* = 8.4 Hz, 1H), 8.39 – 8.37 (m, 1H), 8.33 – 8.31 (m, 1H), 8.28 (s, 1H), 8.17 (d, *J* = 1.2 Hz, 1H), 7.99 – 7.92 (m, 3H), 3.10 (s, 3H); <sup>13</sup>C{<sup>1</sup>H} NMR (100 MHz, CDCl<sub>3</sub>) δ 201.6, 142.2, 141.75, 141.72, 140.9, 138.5, 133.1, 132.8, 132.6, 132.0, 131.0, 130.9, 130.6, 129.7, 129.6, 127.2, 124.7, 32.7; HRMS (ESI) *m/z*: [M + H]<sup>+</sup> Calcd for C<sub>11</sub>H<sub>12</sub>BrN<sub>2</sub>O<sup>+</sup> 351.0128; Found 351.0121.

**1-(3-(Trifluoromethyl)benzo[*a*]phenazin-6-yl)ethan-1-one (3fb):** The title compound was purified by column chromatography on silica gel using EtOAc/hexanes (1:19, *v/v*) as an eluent; Yellow solid (47 mg, 75%); mp = 190-192 °C; <sup>1</sup>H NMR (400 MHz, CDCl<sub>3</sub>) δ 9.49 (d, *J* = 8.5 Hz, 1H), 8.38 – 8.36 (m, 2H), 8.33 – 8.28 (m, 1H), 8.27 (s, 1H), 8.05 (d, *J* = 8.3 Hz, 1H), 7.98 – 7.93 (m, 2H), 3.10 (s, 3H); <sup>13</sup>C{<sup>1</sup>H} NMR (100 MHz, CDCl<sub>3</sub>) δ 201.3, 142.4, 141.7, 141.3, 141.1, 138.6, 134.5, 133.2, 131.8 (q, <sup>2</sup>*J*<sub>C-F</sub> = 35.8 Hz), 131.4, 131.1, 131.0, 129.73, 129.68, 126.8 (q, <sup>4</sup>*J*<sub>C-F</sub> = 4.0 Hz), 126.4, 125.3 (q, <sup>4</sup>*J*<sub>C-F</sub> = 3.0 Hz), 122.6 (q, <sup>1</sup>*J*<sub>C-F</sub> = 273.3 Hz), 32.7; HRMS (ESI) *m/z*: [M + H]<sup>+</sup> Calcd for C<sub>19</sub>H<sub>12</sub>F<sub>3</sub>N<sub>2</sub>O<sup>+</sup> 341.0896; Found 341.0889.

**1-(3-Fluorobenzo[*a*]phenazin-6-yl)ethan-1-one (3qb):** The title compound was purified by column chromatography on silica gel using EtOAc/hexanes (1: 19, *v/v*) as an eluent; yellow solid (47 mg, 72%); mp = 196-198 °C; <sup>1</sup>H NMR (400 MHz, CDCl<sub>3</sub>) δ 9.41 (dd, *J* = 9.0, 5.8 Hz, 1H), 8.35 (dd, *J* = 7.2, 2.4 Hz, 1H), 8.31 – 7.28 (m, 2H), 7.95 – 7.89 (m, 2H), 7.65 (dd, *J* = 8.8, 2.4 Hz, 1H), 7.61 – 7.56 (m, 1H), 3.10 (s, 3H); <sup>13</sup>C{<sup>1</sup>H} NMR (100 MHz, CDCl<sub>3</sub>) δ 201.7, 163.6 (d, <sup>1</sup>*J*<sub>C-F</sub> = 250.0 Hz), 141.9, 141.7, 140.7, 138.5, 133.4, 133.4, 133.1 (d, <sup>4</sup>*J*<sub>C-F</sub> = 3.4 Hz), 130.7, 130.3, 129.7, 129.5, 128.8 (d, <sup>4</sup>*J*<sub>C-F</sub> = 2.2 Hz), 128.2, 128.1, 118.0 (d, <sup>2</sup>*J*<sub>C-F</sub> = 23.0 Hz), 114.5 (d, <sup>2</sup>*J*<sub>C-F</sub> = 21.5 Hz), 32.7; HRMS (ESI) *m/z*: [M + H]<sup>+</sup> Calcd for C<sub>18</sub>H<sub>12</sub>FN<sub>2</sub>O<sup>+</sup> 291.0928; Found 291.0934.

**Indazolo[2,3-*a*]quinoline-6-carbaldehyde (5aa):** The title compound was purified by column chromatography on silica gel using EtOAc/hexanes (1: 9, *v/v*) as an eluent; yellow solid (46 mg, 72%); mp = 148-150 °C; <sup>1</sup>H NMR (400 MHz, CDCl<sub>3</sub>) δ 10.32 (s, 1H), 9.00 (t, *J* = 7.6 Hz, 2H), 8.18 (s, 1H), 8.05 (d, *J* = 7.6 Hz, 1H), 8.00 – 7.93 (m, 2H), 7.69 (t, *J* = 7.6 Hz, 1H), 7.62 (t, *J* = 7.6 Hz, 1H), 7.35 (t, *J* = 7.6 Hz, 1H); <sup>13</sup>C{<sup>1</sup>H} NMR (100 MHz, CDCl<sub>3</sub>) δ 189.8, 149.8, 135.8, 134.3, 132.9, 129.9, 128.6, 128.5, 128.4, 126.8, 124.3, 123.1, 121.8, 117.9, 117.2, 116.6; HRMS (ESI) *m/z*: [M + H]<sup>+</sup> Calcd for C<sub>16</sub>H<sub>11</sub>N<sub>2</sub>O<sup>+</sup> 247.0866; Found 247.0877.

**3-Methylindazolo[2,3-*a*]quinoline-6-carbaldehyde (5ba):** The title compound was purified by column chromatography on silica gel using EtOAc/hexanes (1: 9, *v/v*) as an eluent; yellow solid (49 mg, 78%); mp = 158-160 °C; <sup>1</sup>H NMR (400 MHz, CDCl<sub>3</sub>) δ 10.32 (s, 1H), 9.02 – 8.99 (m, 1H), 8.87 (d, *J* = 8.4 Hz, 1H), 8.12 (s, 1H), 7.99 (d, *J* = 8.7 Hz, 1H), 7.81 (s, 1H),

7.77 (dd,  $J = 8.4, 2.0$  Hz, 1H), 7.63 – 7.59 (m, 1H), 7.37 – 7.32 (m, 1H), 2.61 (s, 3H);  $^{13}\text{C}\{^1\text{H}\}$  NMR (100 MHz,  $\text{CDCl}_3$ )  $\delta$  189.9, 149.7, 136.9, 134.6, 134.3, 134.0, 129.2, 128.5, 128.4, 128.2, 124.2, 123.2, 121.6, 117.6, 117.2, 116.5, 21.3; HRMS (ESI)  $m/z$ :  $[\text{M} + \text{H}]^+$  Calcd for  $\text{C}_{17}\text{H}_{13}\text{N}_2\text{O}^+$  261.1022; Found 261.1025.

**3-Methoxyindazolo[2,3-*a*]quinoline-6-carbaldehyde (5ca):** The title compound was purified by column chromatography on silica gel using EtOAc/hexanes (1: 4,  $v/v$ ) as an eluent; yellow solid (46 mg, 75%); mp = 186-188 °C;  $^1\text{H}$  NMR (400 MHz,  $\text{CDCl}_3$ )  $\delta$  10.25 (s, 1H), 8.95 (d,  $J = 8.4$  Hz, 1H), 8.85 (d,  $J = 9.2$  Hz, 1H), 8.01 (s, 1H), 7.96 (d,  $J = 8.4$  Hz, 1H), 7.60 (t,  $J = 7.6$  Hz, 1H), 7.51 (dd,  $J = 9.2, 2.8$  Hz, 1H), 7.35 – 7.29 (m, 2H), 3.98 (s, 3H);  $^{13}\text{C}\{^1\text{H}\}$  NMR (100 MHz,  $\text{CDCl}_3$ )  $\delta$  189.8, 158.1, 149.5, 133.5, 130.6, 128.6, 128.2, 127.6, 124.2, 124.1, 122.9, 121.5, 119.3, 117.1, 116.3, 109.5, 55.8; HRMS (ESI)  $m/z$ :  $[\text{M} + \text{H}]^+$  Calcd for  $\text{C}_{17}\text{H}_{13}\text{N}_2\text{O}_2^+$  277.0972; Found 277.0979.

**3-Chloroindazolo[2,3-*a*]quinoline-6-carbaldehyde (5da):** The title compound was purified by column chromatography on silica gel using EtOAc/hexanes (1: 9,  $v/v$ ) as an eluent; yellow solid (43 mg, 70%); mp = 192-194 °C;  $^1\text{H}$  NMR (400 MHz,  $\text{CDCl}_3$ )  $\delta$  10.24 (s, 1H), 8.91 (d,  $J = 8.6$  Hz, 1H), 8.85 (d,  $J = 9.0$  Hz, 1H), 7.96 – 7.92 (m, 3H), 7.83 (dd,  $J = 9.2, 2.4$  Hz, 1H), 7.61 (t,  $J = 7.6$  Hz, 1H), 7.34 (t,  $J = 7.6$  Hz, 1H);  $^{13}\text{C}\{^1\text{H}\}$  NMR (100 MHz,  $\text{CDCl}_3$ )  $\delta$  189.4, 149.8, 134.0, 132.9, 132.6, 132.4, 129.2, 128.8, 128.5, 128.2, 124.1, 123.9, 122.2, 119.4, 117.2, 116.6; HRMS (ESI)  $m/z$ :  $[\text{M} + \text{H}]^+$  Calcd for  $\text{C}_{16}\text{H}_{10}\text{ClN}_2\text{O}^+$  281.0476, Found 281.0485

**3-Bromoindazolo[2,3-*a*]quinoline-6-carbaldehyde (5ea):** The title compound was purified by column chromatography on silica gel using EtOAc/hexanes (1: 9,  $v/v$ ) as an eluent; yellow solid (44 mg, 74%); mp = 208-210 °C;  $^1\text{H}$  NMR (400 MHz,  $\text{CDCl}_3$ )  $\delta$  10.30 (s, 1H), 8.96 (d,  $J = 8.8$  Hz, 2H), 8.85 (d,  $J = 9.2$  Hz, 1H), 8.18 (d,  $J = 2.0$  Hz, 2H), 8.05 (s, 1H), 8.01 (dd,  $J = 9.2, 2.0$  Hz, 1H), 7.97 (d,  $J = 8.8$  Hz, 1H), 7.64 – 7.60 (m, 1H), 7.38 – 7.34 (m, 1H);  $^{13}\text{C}\{^1\text{H}\}$  NMR (100 MHz,  $\text{CDCl}_3$ )  $\delta$  189.4, 149.9, 135.6, 134.4, 132.4, 131.7, 129.3, 128.8, 128.3, 124.4, 124.1, 122.2, 120.3, 119.6, 117.2, 116.6; HRMS (ESI)  $m/z$ :  $[\text{M} + \text{H}]^+$  Calcd for  $\text{C}_{16}\text{H}_{10}\text{BrN}_2\text{O}^+$  324.9971; Found 324.9977.

**3-Fluoroindazolo[2,3-*a*]quinoline-6-carbaldehyde (5fa):** The title compound was purified by column chromatography on silica gel using EtOAc/hexanes (1: 9,  $v/v$ ) as an eluent; yellow solid (43 mg, 69%); mp = 178-180 °C;  $^1\text{H}$  NMR (400 MHz,  $\text{CDCl}_3$ )  $\delta$  10.32 (s, 1H), 9.01 – 8.94 (m, 2H), 8.08 (s, 1H), 7.97 (d,  $J = 8.8$  Hz, 1H), 7.69 (d,  $J = 8.0$  Hz, 2H), 7.65 – 7.60 (m, 1H), 7.38 – 7.34 (m, 1H);  $^{13}\text{C}\{^1\text{H}\}$  NMR (100 MHz,  $\text{CDCl}_3$ )  $\delta$  189.5, 160.6 (d,  $^1J_{\text{C-F}} = 247.2$  Hz), 149.7, 132.7 (d,  $^4J_{\text{C-F}} = 3.6$  Hz), 132.4, 129.4, 128.6, 128.0, 124.2, 124.2, 124.1, 122.0, 121.3 (d,  $^2J_{\text{C-F}} = 24.6$  Hz), 120.2 (d,  $^3J_{\text{C-F}} = 8.6$  Hz), 117.2, 116.6, 114.0 (d,  $^2J_{\text{C-F}} = 22.6$  Hz); HRMS (ESI)  $m/z$ :  $[\text{M} + \text{H}]^+$  Calcd for  $\text{C}_{16}\text{H}_{10}\text{FN}_2\text{O}^+$  265.0772; Found 265.0771.

**2-Methylindazolo[2,3-*a*]quinoline-6-carbaldehyde (5ga):** The title compound was purified by column chromatography on silica gel using EtOAc/hexanes (1: 9,  $v/v$ ) as an eluent; yellow

solid (51 mg, 81%); mp = 154-156 °C; <sup>1</sup>H NMR (400 MHz, CDCl<sub>3</sub>) δ 10.24 (s, 1H), 9.00 (d, *J* = 8.4 Hz, 1H), 8.76 (s, 1H), 8.09 (s, 1H), 7.97 (d, *J* = 8.4 Hz, 1H), 7.88 (d, *J* = 8.0 Hz, 1H), 7.60 (t, *J* = 7.6 Hz, 1H), 7.46 (d, *J* = 7.6 Hz, 1H), 7.33 (t, *J* = 7.6 Hz, 1H), 2.69 (s, 3H); <sup>13</sup>C{<sup>1</sup>H} NMR (100 MHz, CDCl<sub>3</sub>) δ 189.6, 149.8, 144.6, 135.7, 134.5, 129.6, 128.6, 128.52, 128.48, 127.6, 124.4, 121.5, 120.9, 117.5, 117.1, 116.4, 22.4; HRMS (ESI) *m/z*: [M + H]<sup>+</sup> Calcd for C<sub>17</sub>H<sub>13</sub>N<sub>2</sub>O<sup>+</sup> 261.1022; Found 261.1014.

**8-Chloroindazolo[2,3-*a*]quinoline-6-carbaldehyde (5ha):** The title compound was purified by column chromatography on silica gel using EtOAc/hexanes (1: 9, *v/v*) as an eluent; yellow solid (45 mg, 73%); mp = 196-198 °C; <sup>1</sup>H NMR (400 MHz, CDCl<sub>3</sub>) δ 10.27 (s, 1H), 9.07 (d, *J* = 1.6 Hz, 1H), 8.98 (d, *J* = 8.8 Hz, 1H), 8.22 (s, 1H), 8.08 (d, *J* = 8.0 Hz, 1H), 8.01 – 7.96 (m, 1H), 7.91 (d, *J* = 8.8 Hz, 1H), 7.75 – 7.70 (m, 1H), 7.53 (dd, *J* = 9.2, 2.0 Hz, 1H); <sup>13</sup>C{<sup>1</sup>H} NMR (100 MHz, CDCl<sub>3</sub>) δ 189.7, 148.1, 135.8, 135.2, 133.2, 129.9, 129.8, 128.4, 127.9, 127.2, 127.1, 123.25, 123.22, 118.0, 117.9, 117.6; HRMS (ESI) *m/z*: [M + H]<sup>+</sup> Calcd for C<sub>16</sub>H<sub>10</sub>ClN<sub>2</sub>O<sup>+</sup> 281.0476; Found 281.0482.

**8-Fluoroindazolo[2,3-*a*]quinoline-6-carbaldehyde (5ia):** The title compound was purified by column chromatography on silica gel using EtOAc/hexanes (1: 9, *v/v*) as an eluent; yellow solid (47 mg, 75%); mp = 188-190 °C; <sup>1</sup>H NMR (400 MHz, CDCl<sub>3</sub>) δ 10.21 (s, 1H), 8.93 (d, *J* = 8.4 Hz, 1H), 8.67 (dd, *J* = 10.4, 2.0 Hz, 1H), 8.12 (s, 1H), 8.04 (d, *J* = 7.6 Hz, 1H), 7.97 – 7.91 (m, 2H), 7.71 – 7.67 (m, 1H), 7.42 – 7.37 (m, 1H); <sup>13</sup>C{<sup>1</sup>H} NMR (100 MHz, CDCl<sub>3</sub>) δ 189.8, 157.9 (d, <sup>1</sup>*J*<sub>C-F</sub> = 247.2 Hz), 147.41, 135.8, 134.7, 132.9, 129.8, 128.5, 128.46, 128.41, 127.0, 123.1, 119.7 (d, <sup>2</sup>*J*<sub>C-F</sub> = 28.8 Hz), 118.3 (d, <sup>3</sup>*J*<sub>C-F</sub> = 9.5 Hz), 117.7, 116.7 (d, <sup>3</sup>*J*<sub>C-F</sub> = 12.6 Hz), 107.6 (d, <sup>2</sup>*J*<sub>C-F</sub> = 26.8 Hz); HRMS (ESI) *m/z*: [M + H]<sup>+</sup> Calcd for C<sub>16</sub>H<sub>10</sub>FN<sub>2</sub>O<sup>+</sup> 265.0772; Found 265.0777.

**1-(Indazolo[2,3-*a*]quinolin-6-yl)ethan-1-one (5ab):** The title compound was purified by column chromatography on silica gel using EtOAc/hexanes (1: 4, *v/v*) as an eluent; yellow solid (46 mg, 68%); mp = 166-168 °C; <sup>1</sup>H NMR (400 MHz, CDCl<sub>3</sub>) δ 8.95 (d, *J* = 8.4 Hz, 1H), 8.62 (d, *J* = 8.8 Hz, 1H), 8.09 (s, 1H), 7.96 (t, *J* = 9.0 Hz, 2H), 7.90 – 7.86 (m, 1H), 7.65 – 7.56 (m, 2H), 7.31 – 7.27 (m, 1H), 2.87 (s, 3H); <sup>13</sup>C{<sup>1</sup>H} NMR (100 MHz, CDCl<sub>3</sub>) δ 197.3, 149.9, 135.2, 131.9, 129.7, 129.4, 128.9, 128.3, 127.1, 126.6, 124.2, 123.1, 121.5, 117.7, 116.6, 116.5, 28.3; HRMS (ESI) *m/z*: [M + H]<sup>+</sup> Calcd for C<sub>17</sub>H<sub>13</sub>N<sub>2</sub>O<sup>+</sup> 261.1022; Found 261.1014.

**1-(Indazolo[2,3-*a*]quinolin-6-yl)propan-1-one (5ac):** The title compound was purified by column chromatography on silica gel using EtOAc/hexanes (1: 9, *v/v*) as an eluent; yellow solid (46 mg, 65%); mp = 172-174 °C; <sup>1</sup>H NMR (400 MHz, CDCl<sub>3</sub>) δ 9.00 (d, *J* = 8.4 Hz, 1H), 8.53 (d, *J* = 8.8 Hz, 1H), 8.10 (s, 1H), 7.99 (d, *J* = 8.4 Hz, 2H), 7.92 – 7.88 (m, 1H), 7.68 – 7.64 (m, 1H), 7.61 – 7.57 (m, 1H), 7.31 (d, *J* = 7.6 Hz, 1H), 3.26 (q, *J* = 7.2 Hz, 2H), 1.42 (t, *J* = 7.2 Hz, 3H); <sup>13</sup>C{<sup>1</sup>H} NMR (100 MHz, CDCl<sub>3</sub>) δ 200.7, 149.9, 135.2, 131.6, 129.9,

129.3, 129.0, 128.2, 126.6, 125.6, 123.8, 123.3, 121.5, 117.7, 116.7, 116.6, 33.8, 8.5; HRMS (ESI)  $m/z$ :  $[M + H]^+$  Calcd for  $C_{18}H_{15}N_2O^+$  275.1179; Found 275.1187.

**1-(3-Methylindazolo[2,3-*a*]quinolin-6-yl)ethan-1-one (5bb):** The title compound was purified by column chromatography on silica gel using EtOAc/hexanes (1: 9, *v/v*) as an eluent; yellow solid (47 mg, 71%); mp = 176-178 °C;  $^1H$  NMR (400 MHz,  $CDCl_3$ )  $\delta$  8.86 (d,  $J$  = 8.8 Hz, 1H), 8.64 (d,  $J$  = 8.8 Hz, 1H), 8.07 (s, 1H), 7.97 (d,  $J$  = 8.8 Hz, 1H), 7.75 (s, 1H), 7.72 (d,  $J$  = 8.8 Hz, 1H), 7.60 – 7.56 (m, 1H), 7.31 – 7.29 (m, 1H), 2.88 (s, 3H), 2.60 (s, 3H);  $^{13}C\{^1H\}$  NMR (100 MHz,  $CDCl_3$ )  $\delta$  197.4, 149.8, 136.7, 133.6, 129.7, 128.8, 128.7, 128.1, 127.0, 124.1, 123.2, 121.3, 117.5, 116.8, 116.5, 28.4, 21.3; HRMS (ESI)  $m/z$ :  $[M + H]^+$  Calcd for  $C_{18}H_{15}N_2O^+$  275.1179; Found 275.1185.

**1-(3-Methoxyindazolo[2,3-*a*]quinolin-6-yl)ethan-1-one (5cb):** The title compound was purified by column chromatography on silica gel using EtOAc/hexanes (1: 4, *v/v*) as an eluent; yellow solid (45 mg, 69%); mp = 168-170 °C;  $^1H$  NMR (400 MHz,  $CDCl_3$ )  $\delta$  8.90 (d,  $J$  = 9.2 Hz, 1H), 8.62 (d,  $J$  = 8.4 Hz, 1H), 8.06 (s, 1H), 7.96 (d,  $J$  = 8.8 Hz, 1H), 7.58 (t,  $J$  = 7.6 Hz, 1H), 7.51 (dd,  $J$  = 9.2, 2.4 Hz, 1H), 7.32 – 7.29 (m, 2H), 4.00 (s, 3H), 2.88 (s, 3H);  $^{13}C\{^1H\}$  NMR (100 MHz,  $CDCl_3$ )  $\delta$  197.4, 158.1, 149.7, 130.2, 128.3, 127.9, 126.5, 124.3, 123.9, 121.9, 121.2, 119.2, 116.8, 116.3, 109.3, 55.8, 28.4; HRMS (ESI)  $m/z$ :  $[M + H]^+$  Calcd for  $C_{18}H_{15}N_2O_2^+$  291.1128; Found 291.1137.

**1-(3-Chloroindazolo[2,3-*a*]quinolin-6-yl)ethan-1-one (5db):** The title compound was purified by column chromatography on silica gel using EtOAc/hexanes (1: 9, *v/v*) as an eluent; yellow solid (43 mg, 67%); mp = 194-196 °C;  $^1H$  NMR (400 MHz,  $CDCl_3$ )  $\delta$  8.86 (d,  $J$  = 9.2 Hz, 1H), 8.55 (d,  $J$  = 8.8 Hz, 1H), 7.94 – 7.89 (m, 3H), 7.79 (dd,  $J$  = 9.0, 1.8 Hz, 1H), 7.58 (t,  $J$  = 7.6 Hz, 1H), 7.31 – 7.28 (m, 1H), 2.85 (s, 3H);  $^{13}C\{^1H\}$  NMR (100 MHz,  $CDCl_3$ )  $\delta$  197.0, 149.9, 133.5, 132.3, 132.0, 130.7, 128.7, 128.5, 128.2, 125.3, 124.02, 124.00, 121.8, 119.2, 116.8, 116.6, 28.4; HRMS (ESI)  $m/z$ :  $[M + H]^+$  Calcd for  $C_{17}H_{12}ClN_2O^+$  295.0633; Found 295.0630.

**1-(3-Bromoindazolo[2,3-*a*]quinolin-6-yl)ethan-1-one (5eb):** The title compound was purified by column chromatography on silica gel using EtOAc/hexanes (1: 9, *v/v*) as an eluent; yellow solid (40 mg, 64%); mp = 160-162 °C;  $^1H$  NMR (400 MHz,  $CDCl_3$ )  $\delta$  8.86 (d,  $J$  = 9.2 Hz, 1H), 8.58 (d,  $J$  = 8.4 Hz, 1H), 8.14 (s, 1H), 8.00 – 7.95 (m, 3H), 7.60 (t,  $J$  = 7.4 Hz, 1H), 7.33 – 7.29 (m, 1H), 2.88 (s, 3H);  $^{13}C\{^1H\}$  NMR (100 MHz,  $CDCl_3$ )  $\delta$  197.1, 150.0, 134.7, 134.0, 131.4, 130.8, 128.8, 128.5, 125.2, 124.5, 124.0, 121.9, 120.1, 119.5, 116.9, 116.6, 28.4; HRMS (ESI)  $m/z$ :  $[M + H]^+$  Calcd for  $C_{17}H_{12}BrN_2O^+$  339.0128; Found 339.0136.

**1-(3-Fluoroindazolo[2,3-*a*]quinolin-6-yl)ethan-1-one (5fb):** The title compound was purified by column chromatography on silica gel using EtOAc/hexanes (1: 9, *v/v*) as an eluent; yellow solid (42 mg, 65%); mp = 174-176 °C;  $^1H$  NMR (400 MHz,  $CDCl_3$ )  $\delta$  8.98 (dd,  $J$  = 10.0, 4.8 Hz, 1H), 8.57 (d,  $J$  = 8.8 Hz, 1H), 8.01 (s, 1H), 7.96 (d,  $J$  = 8.8 Hz, 1H), 7.63 – 7.57

(m, 3H), 7.33 – 7.29 (m, 1H), 2.88 (s, 3H);  $^{13}\text{C}\{^1\text{H}\}$  NMR (100 MHz,  $\text{CDCl}_3$ )  $\delta$  197.2, 160.6 (d,  $^1J_{\text{C-F}} = 246.4$  Hz), 149.8, 131.9, 130.9, 128.5, 128.3, 125.5 (d,  $^4J_{\text{C-F}} = 3.6$  Hz), 124.3 (d,  $^3J_{\text{C-F}} = 9.1$  Hz), 123.9, 121.7, 120.3 (d,  $^2J_{\text{C-F}} = 24.7$  Hz), 120.0 (d,  $^3J_{\text{C-F}} = 8.5$  Hz), 116.9, 116.6, 113.6 (d,  $^2J_{\text{C-F}} = 22.7$  Hz), 28.5; HRMS (ESI)  $m/z$ :  $[\text{M} + \text{H}]^+$  Calcd for  $\text{C}_{17}\text{H}_{12}\text{FN}_2\text{O}^+$  279.0928; Found 279.0934.

**1-(2-Methylindazolo[2,3-*a*]quinolin-6-yl)ethan-1-one (5gb):** The title compound was purified by column chromatography on silica gel using EtOAc/hexanes (1: 9,  $v/v$ ) as an eluent; yellow solid (46 mg, 70%); mp = 162-164 °C;  $^1\text{H}$  NMR (400 MHz,  $\text{CDCl}_3$ )  $\delta$  8.77 (s, 1H), 8.67 (d,  $J = 8.4$  Hz, 1H), 8.09 (s, 1H), 7.97 (d,  $J = 8.4$  Hz, 1H), 7.84 (d,  $J = 8.0$  Hz, 1H), 7.58 (t,  $J = 7.6$  Hz, 1H), 7.45 (d,  $J = 8.0$  Hz, 1H), 7.30 – 7.27 (m, 1H), 2.86 (s, 3H), 2.68 (s, 3H);  $^{13}\text{C}\{^1\text{H}\}$  NMR (100 MHz,  $\text{CDCl}_3$ )  $\delta$  197.2, 149.9, 143.4, 135.2, 129.24, 129.18, 128.8, 128.4, 128.3, 127.4, 124.3, 121.3, 120.9, 117.4, 116.8, 116.4, 28.3, 22.3; HRMS (ESI)  $m/z$ :  $[\text{M} + \text{H}]^+$  Calcd for  $\text{C}_{18}\text{H}_{15}\text{N}_2\text{O}^+$  275.1179; Found 275.1185.

**1-(8-Chloroindazolo[2,3-*a*]quinolin-6-yl)ethan-1-one (5hb):** The title compound was purified by column chromatography on silica gel using EtOAc/hexanes (1:9,  $v/v$ ) as an eluent; yellow solid (41 mg, 64%); mp = 172-174 °C;  $^1\text{H}$  NMR (400 MHz,  $\text{CDCl}_3$ )  $\delta$  8.95 (d,  $J = 8.4$  Hz, 1H), 8.70 (d,  $J = 1.6$  Hz, 1H), 8.18 (s, 1H), 8.00 (d,  $J = 7.6$  Hz, 1H), 7.94 – 7.87 (m, 2H), 7.69 (t,  $J = 7.4$  Hz, 1H), 7.50 (dd,  $J = 9.0, 2.2$  Hz, 1H), 2.89 (s, 3H);  $^{13}\text{C}\{^1\text{H}\}$  NMR (100 MHz,  $\text{CDCl}_3$ )  $\delta$  197.0, 148.2, 135.3, 132.2, 129.55, 129.47, 129.4, 128.6, 127.9, 127.0, 126.8, 123.3, 123.2, 117.9, 117.7, 117.3, 28.2; HRMS (ESI)  $m/z$ :  $[\text{M} + \text{H}]^+$  Calcd for  $\text{C}_{17}\text{H}_{12}\text{ClN}_2\text{O}^+$  295.0633; Found 295.0628.

**4-(2-(Quinoxalin-2-yl)phenyl)butan-2-one (6ab):** The title compound was purified by column chromatography on silica gel using EtOAc/hexanes (1: 4,  $v/v$ ) as an eluent; yellow oily liquid (46 mg, 68%);  $^1\text{H}$  NMR (400 MHz,  $\text{CDCl}_3$ )  $\delta$  9.04 (s, 1H), 8.19 – 8.17 (m, 1H), 8.12 – 8.10 (m, 1H), 7.85 – 7.80 (m, 2H), 7.56 – 7.53 (m, 1H), 7.48 – 7.39 (m, 3H), 3.07 (t,  $J = 8.0$  Hz, 2H), 2.86 (t,  $J = 7.2$  Hz, 2H), 2.10 (s, 3H);  $^{13}\text{C}\{^1\text{H}\}$  NMR (100 MHz,  $\text{CDCl}_3$ )  $\delta$  207.8, 154.7, 145.8, 141.7, 141.1, 140.3, 136.9, 130.5, 130.4, 130.3, 129.9, 129.7, 129.5, 129.3, 126.7, 45.7, 29.9, 27.5; HRMS (ESI)  $m/z$ :  $[\text{M} + \text{H}]^+$  Calcd for  $\text{C}_{18}\text{H}_{17}\text{N}_2\text{O}^+$  277.1335; Found 277.1344.

**1-(2-(2*H*-Indazol-2-yl)phenyl)pentan-3-one (7ac):** The title compound was purified by column chromatography on silica gel using EtOAc/hexanes (1: 4,  $v/v$ ) as an eluent; yellow oily liquid (51 mg, 71%);  $^1\text{H}$  NMR (400 MHz,  $\text{CDCl}_3$ )  $\delta$  8.16 (d,  $J = 0.8$  Hz, 1H), 7.80 – 7.75 (m, 2H), 7.47 – 7.35 (m, 5H), 7.19 – 7.15 (m, 1H), 2.84 (t,  $J = 7.6$  Hz, 2H), 2.62 (t,  $J = 7.6$  Hz, 2H), 2.30 (q,  $J = 7.4$  Hz, 2H), 0.97 (t,  $J = 7.4$  Hz, 3H);  $^{13}\text{C}\{^1\text{H}\}$  NMR (100 MHz,  $\text{CDCl}_3$ )  $\delta$  210.4, 149.3, 140.1, 137.5, 130.5, 129.5, 127.05, 127.00, 126.5, 124.6, 122.3, 122.0, 120.4, 117.9, 43.0, 35.9, 25.7, 7.7; HRMS (ESI)  $m/z$ :  $[\text{M} + \text{H}]^+$  Calcd for  $\text{C}_{18}\text{H}_{19}\text{N}_2\text{O}^+$  279.1492; Found 279.1484.

**Methyl benzo[*a*]phenazine-6-carboxylate (8):** The title compound was purified by column chromatography on silica gel using EtOAc/hexanes (1: 4, *v/v*) as an eluent; off white solid (24 mg, 76%); mp = 122-124 °C; <sup>1</sup>H NMR (400 MHz, CDCl<sub>3</sub>) δ 9.46 (d, *J* = 8.0 Hz, 1H), 8.51 (s, 1H), 8.40 – 8.37 (m, 2H), 8.02 (d, *J* = 7.6 Hz, 1H), 7.94 – 7.89 (m, 3H), 7.87 – 7.83 (m, 1H), 4.16 (s, 3H); <sup>13</sup>C{<sup>1</sup>H} NMR (100 MHz, CDCl<sub>3</sub>) δ 167.2, 142.6, 141.9, 141.7, 140.9, 135.6, 132.4, 131.4, 130.6, 130.2, 130.12, 130.10, 129.7, 129.5, 129.4, 129.2, 125.6, 52.7; HRMS (ESI) *m/z*: [M + H]<sup>+</sup> Calcd for C<sub>18</sub>H<sub>13</sub>N<sub>2</sub>O<sub>2</sub><sup>+</sup> 289.0972; Found 289.0978.

**Benzo[*a*]phenazine (9):** The title compound was purified by column chromatography on silica gel using EtOAc/hexanes (1: 19, *v/v*) as an eluent; yellow solid (30 mg, 72%); mp = 232-234 °C (Lit. mp 236-237 °C)<sup>4</sup>; <sup>1</sup>H NMR (400 MHz, CDCl<sub>3</sub>) 9.47 – 9.44 (m, 1H), 8.41 – 8.39 (m, 1H), 8.33 – 8.30 (m, 1H), 8.06 – 7.99 (m, 2H), 7.96 – 7.94 (m, 1H), 7.91 – 7.89 (m, 2H), 7.86 – 7.79 (m, 2H); <sup>13</sup>C{<sup>1</sup>H} NMR (100 MHz, CDCl<sub>3</sub>) δ 143.6, 142.7, 142.0, 133.4, 133.3, 131.2, 130.1, 129.90, 129.86, 129.7, 129.2, 128.3, 128.0, 127.2, 125.4; HRMS (ESI) *m/z*: [M + H]<sup>+</sup> Calcd for C<sub>16</sub>H<sub>11</sub>N<sub>2</sub><sup>+</sup> 231.0917; Found 231.0917.

***N,N*-Dimethylbenzo[*a*]phenazine-6-carboxamide (10):** The title compound was purified by column chromatography on silica gel using EtOAc/hexanes (1: 3, *v/v*) as an eluent; off white solid (21 mg, 64%); mp = 118-120 °C; <sup>1</sup>H NMR (400 MHz, CDCl<sub>3</sub>) δ 9.45 (dd, *J* = 7.8, 1.4 Hz, 1H), 8.41 – 8.38 (m, 1H), 8.34 – 8.31 (m, 1H), 8.06 (s, 1H), 7.97 – 7.81 (m, 5H), 3.38 (s, 3H), 2.92 (s, 3H); <sup>13</sup>C{<sup>1</sup>H} NMR (100 MHz, CDCl<sub>3</sub>) δ 169.4, 142.7, 142.0, 141.9, 140.8, 135.0, 132.3, 131.3, 131.0, 130.4, 130.1, 129.9, 129.6, 128.7, 128.6, 125.4, 38.8, 35.1; HRMS (ESI) *m/z*: [M + H]<sup>+</sup> Calcd for C<sub>19</sub>H<sub>16</sub>N<sub>3</sub>O<sup>+</sup> 302.1288; Found 302.1292.

**1-(3-Methylbenzo[*a*]phenazin-6-yl)ethan-1-ol (11):** The title compound was purified by column chromatography on silica gel using EtOAc/hexanes (1:4, *v/v*) as an eluent; off white solid (28 mg, 90%); mp = 184-186 °C; <sup>1</sup>H NMR (400 MHz, CDCl<sub>3</sub>) δ 9.22 (d, *J* = 8.0 Hz, 1H), 8.36 – 8.34 (m, 1H), 8.25 – 8.23 (m, 1H), 7.91 – 7.83 (m, 3H), 7.67 (s, 1H), 7.60 (d, *J* = 8.4 Hz, 1H), 5.63 (q, *J* = 6.8 Hz, 1H), 5.37 (s, 1H), 2.62 (s, 3H), 1.86 (d, *J* = 6.8 Hz, 3H); <sup>13</sup>C{<sup>1</sup>H} NMR (100 MHz, CDCl<sub>3</sub>) δ 143.2, 142.5, 141.6, 140.7, 140.4, 139.0, 132.9, 130.0, 129.9, 129.5, 129.4, 129.08, 129.07, 128.4, 128.2, 125.2, 69.0, 22.9, 21.8; HRMS (ESI) *m/z*: [M + H]<sup>+</sup> Calcd for C<sub>19</sub>H<sub>17</sub>N<sub>2</sub>O<sup>+</sup> 289.1335; Found 289.1341.

**1-(3-Oxopropyl)indazolo[2,3-*a*]quinoline-6-carbaldehyde (12):** The title compound was purified by column chromatography on silica gel using EtOAc/hexanes (1: 4, *v/v*) as an eluent; yellow oily liquid (17 mg, 22%); <sup>1</sup>H NMR (400 MHz, CDCl<sub>3</sub>) δ 10.36 (s, 1H), 10.02 (s, 1H), 9.02 (d, *J* = 8.4 Hz, 1H), 8.20 (s, 1H), 7.98 (d, *J* = 7.2 Hz, 1H), 7.92 (d, *J* = 8.8 Hz, 1H), 7.81 (d, *J* = 6.8 Hz, 1H), 7.62 – 7.58 (m, 2H), 7.37 (t, *J* = 6.6 Hz, 2H), 4.15 (t, *J* = 7.2 Hz, 2H), 3.12 (t, *J* = 6.4 Hz, 2H); <sup>13</sup>C{<sup>1</sup>H} NMR (100 MHz, CDCl<sub>3</sub>) δ 202.2, 189.6, 149.3, 136.7, 135.2, 133.0, 129.7, 129.3, 128.2, 128.1, 127.3, 126.4, 125.1, 123.9, 122.0, 116.8, 115.9, 46.1, 29.8; HRMS (ESI) *m/z*: [M + H]<sup>+</sup> Calcd for C<sub>19</sub>H<sub>15</sub>N<sub>2</sub>O<sub>2</sub><sup>+</sup> 303.1128; Found 303.1132.

13 Copies of  $^1\text{H}$  NMR,  $^{13}\{^1\text{H}\}$  NMR of 3aa-5hb, 6ab, 7ac, 8, 9, 10, 11 and 12

15.88  
9.43  
9.41  
9.25  
8.47  
8.46  
8.45  
8.44  
8.33  
8.32  
8.31  
8.30  
8.15  
8.13  
8.05  
8.04  
8.03  
8.02  
8.01  
8.00  
7.98  
7.98  
7.94  
7.94  
7.92  
7.91  
7.28

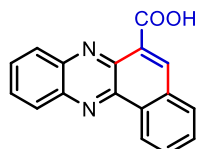

3aa,  $^1\text{H}$  NMR  
400 MHz,  $\text{CDCl}_3$

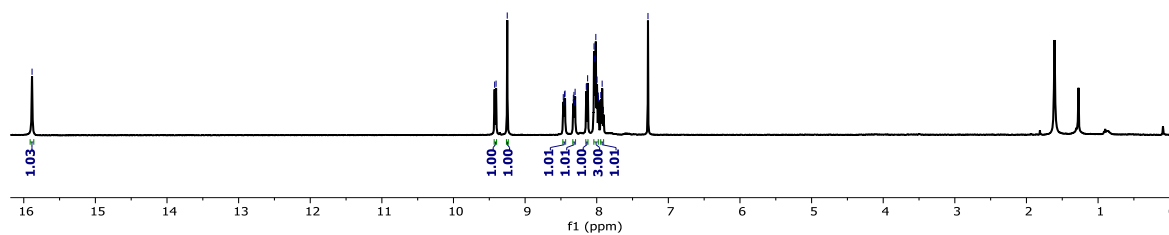

166.4  
142.8  
142.2  
141.8  
140.3  
138.4  
132.4  
132.1  
131.3  
131.2  
131.1  
130.9  
130.8  
130.0  
127.6  
125.5  
121.9

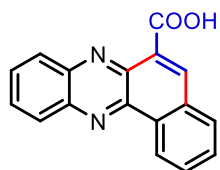

3aa,  $^{13}\text{C}\{^1\text{H}\}$  NMR  
100 MHz,  $\text{CDCl}_3$

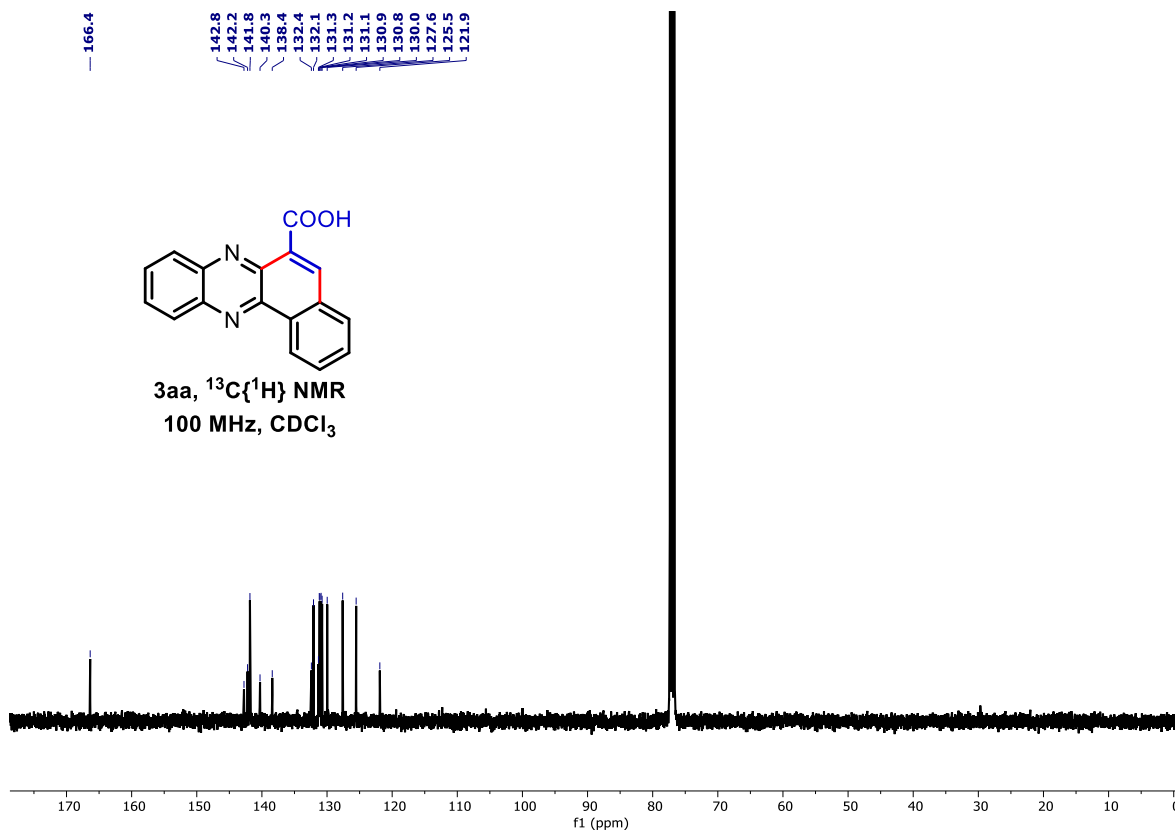



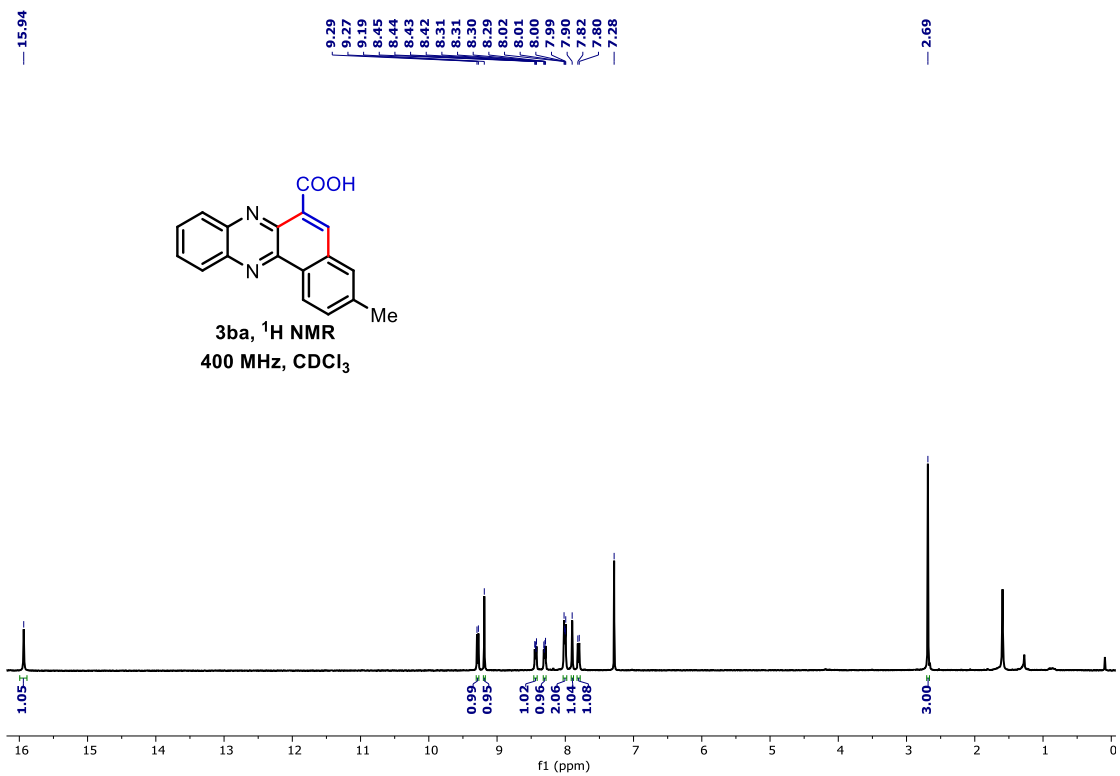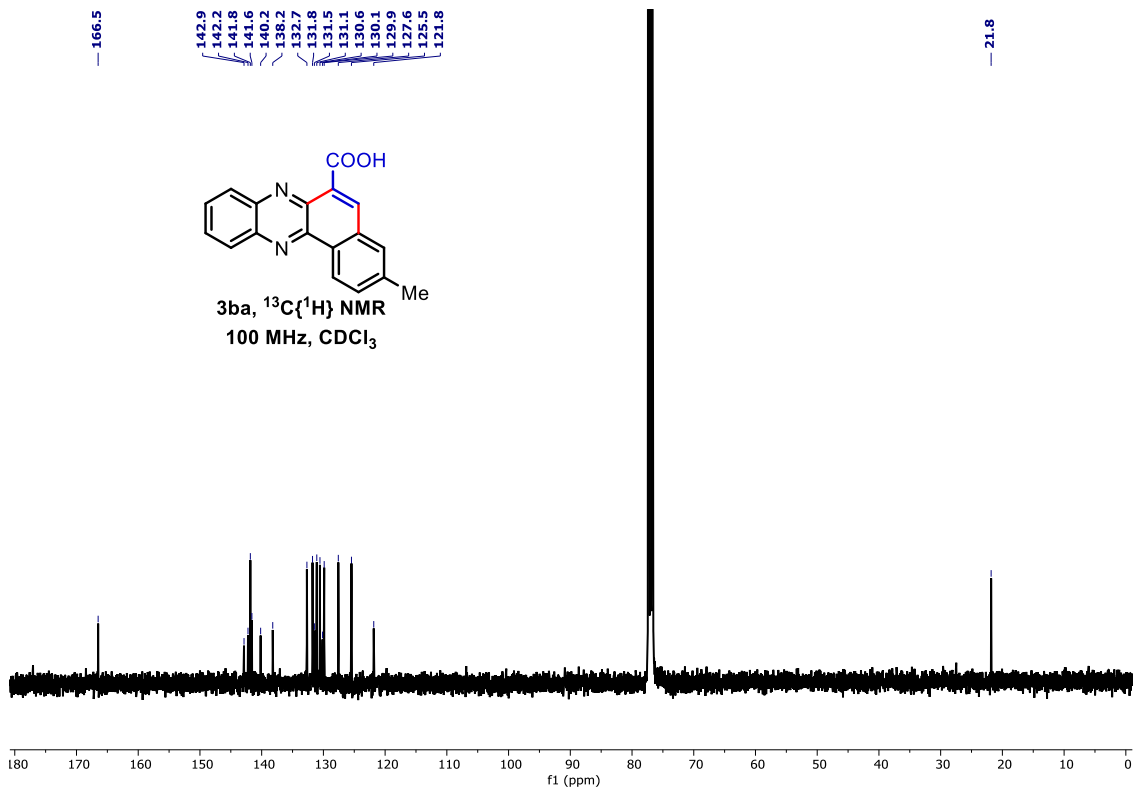

15.98

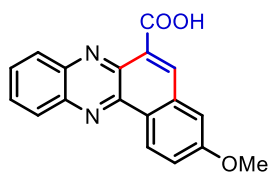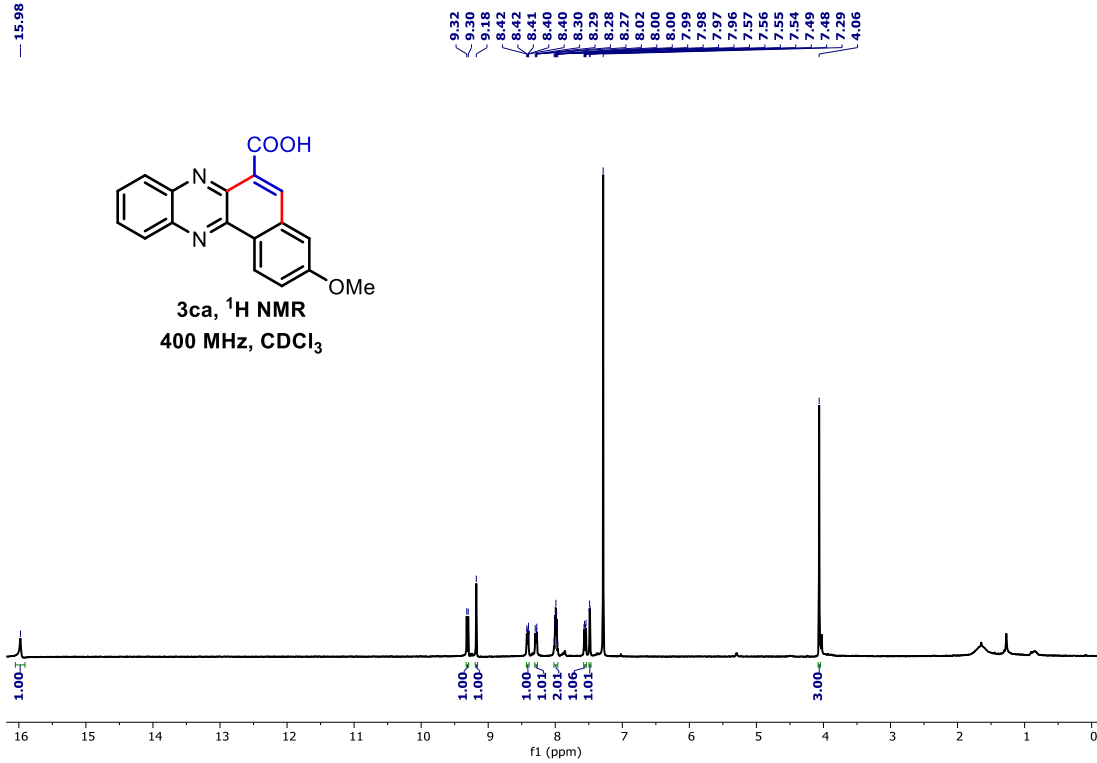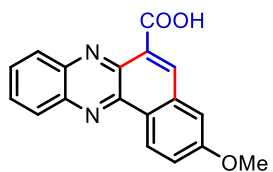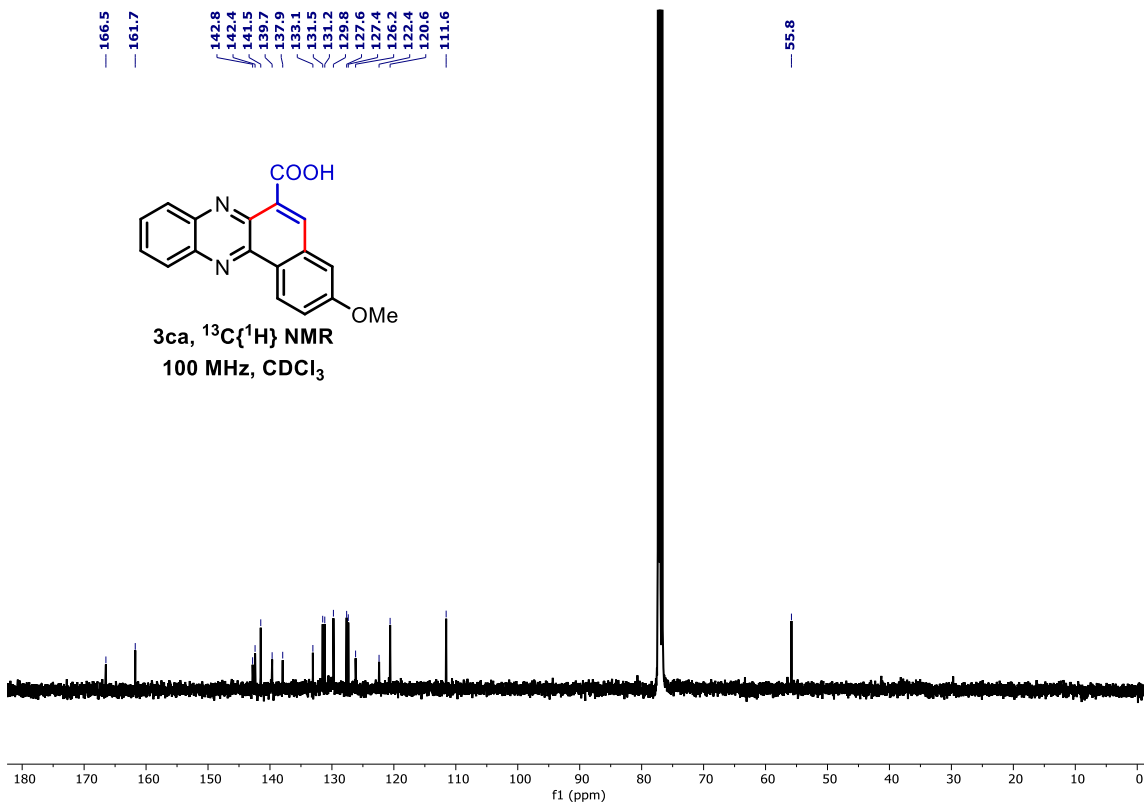

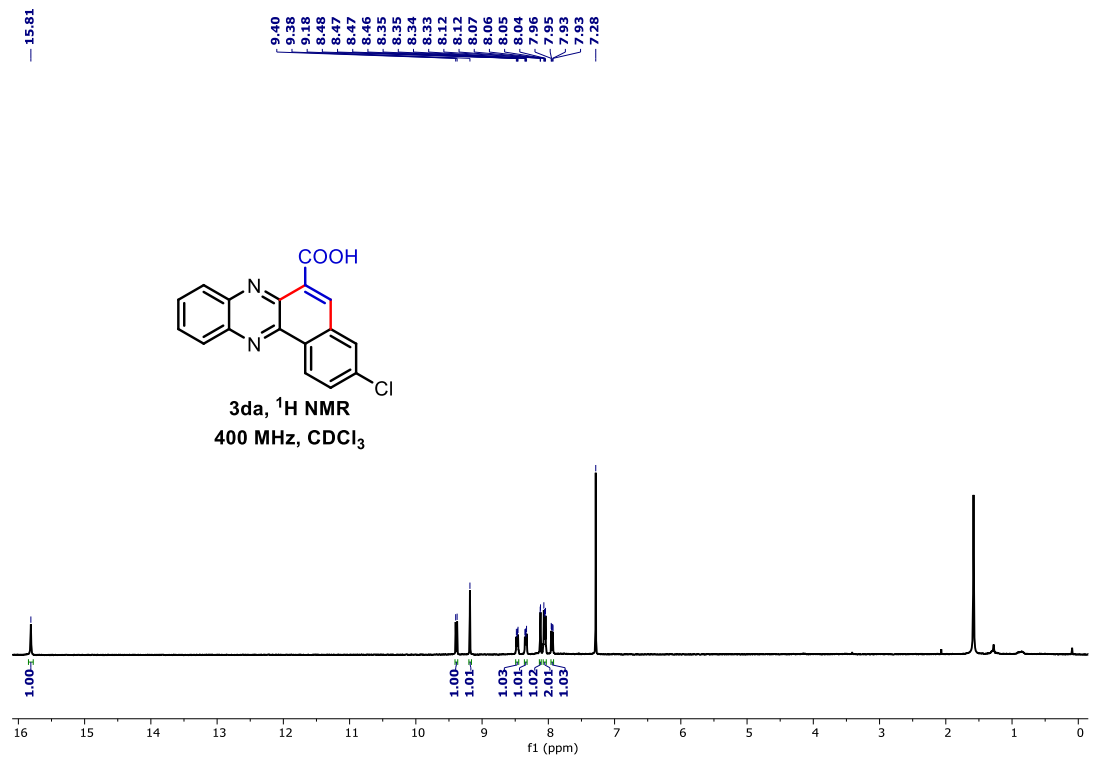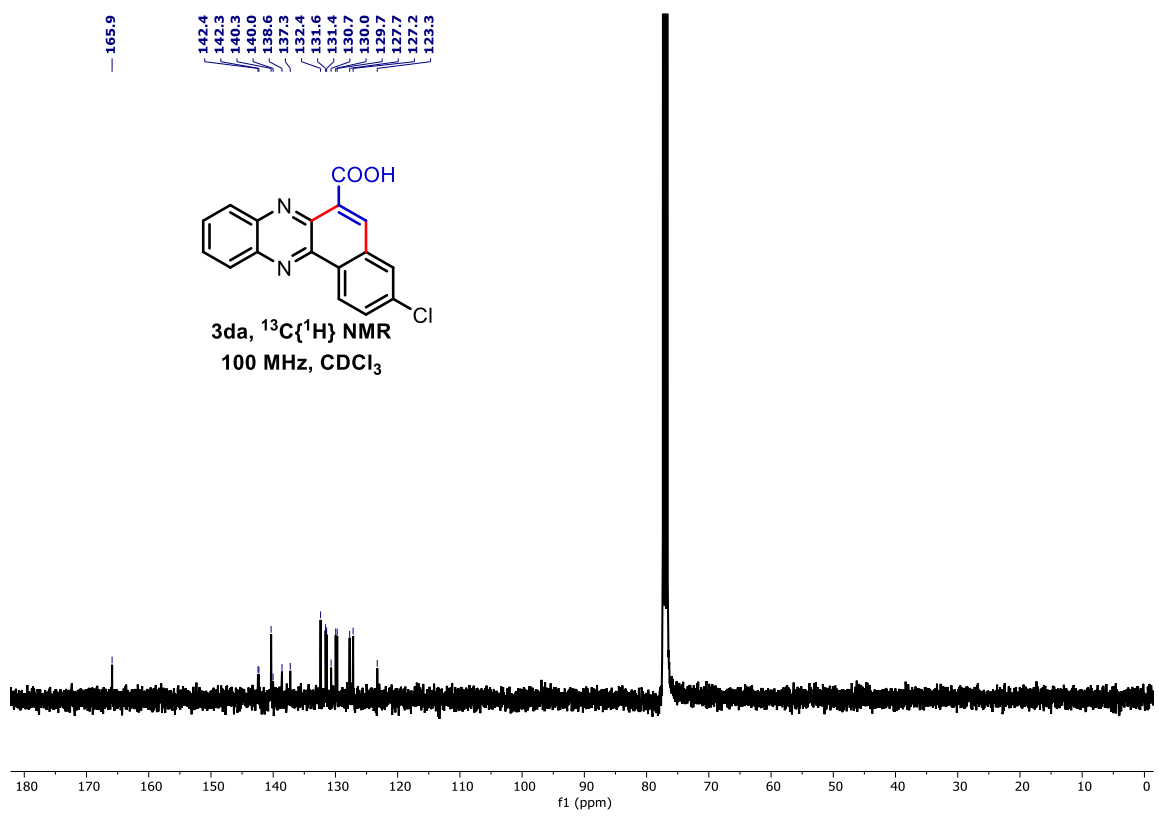

15.80

9.32  
9.30  
8.48  
8.48  
8.47  
8.46  
8.35  
8.34  
8.33  
8.33  
8.29  
8.29  
8.10  
8.10  
8.08  
8.08  
8.07  
8.06  
8.05  
8.04  
7.28

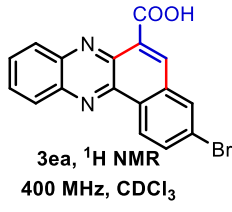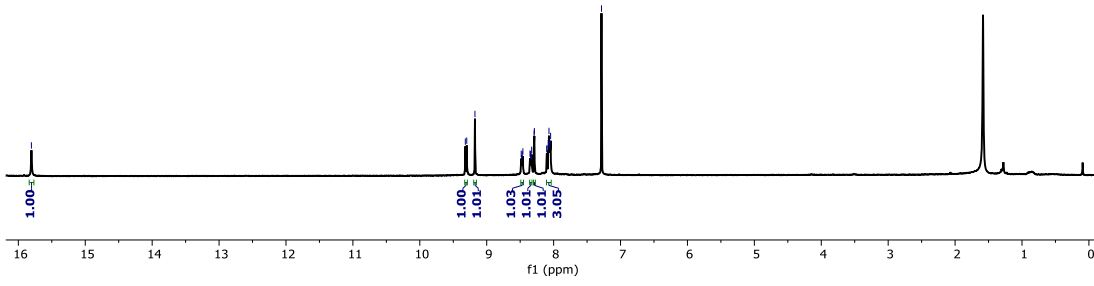

165.8

140.2  
138.0  
138.0  
137.8  
137.6  
137.4  
137.4  
131.6  
131.2  
131.0  
130.9  
130.8  
130.0  
127.7  
127.2  
125.6

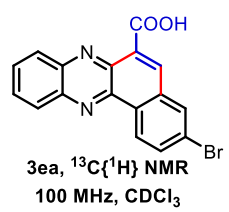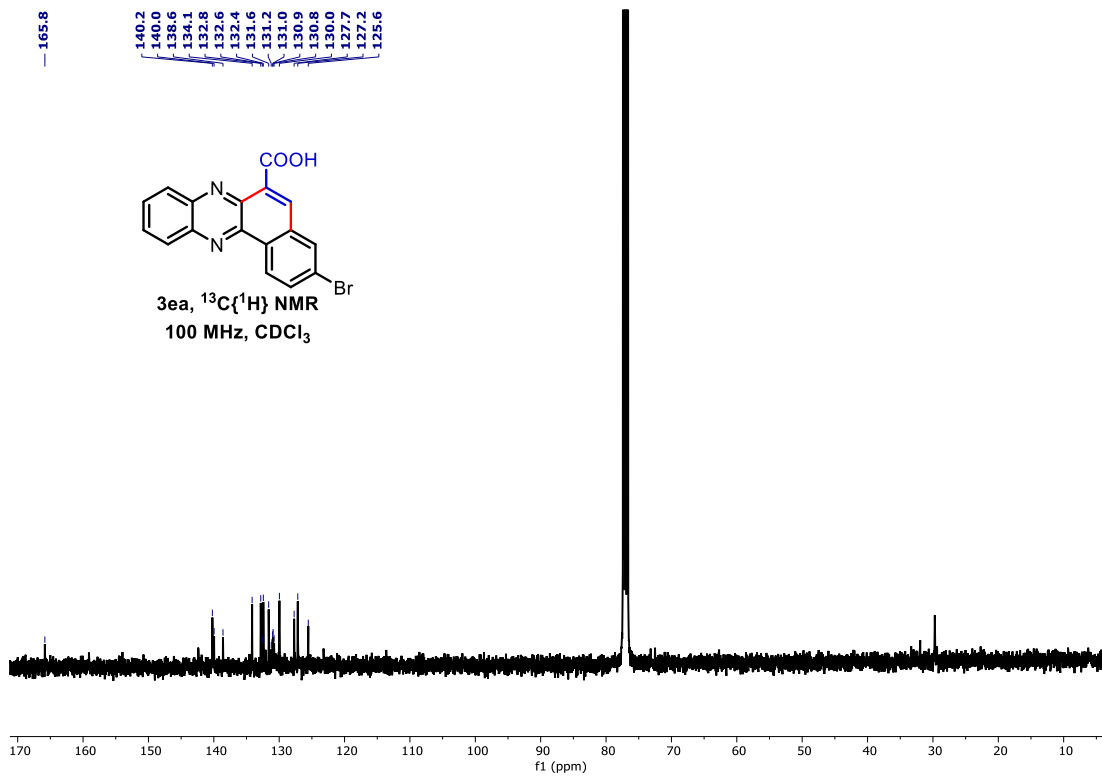

-15.71

9.57  
9.55  
9.29  
8.52  
8.50  
8.49  
8.41  
8.37  
8.36  
8.35  
8.18  
8.10  
8.09  
8.08  
7.28

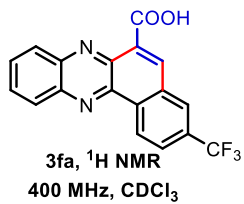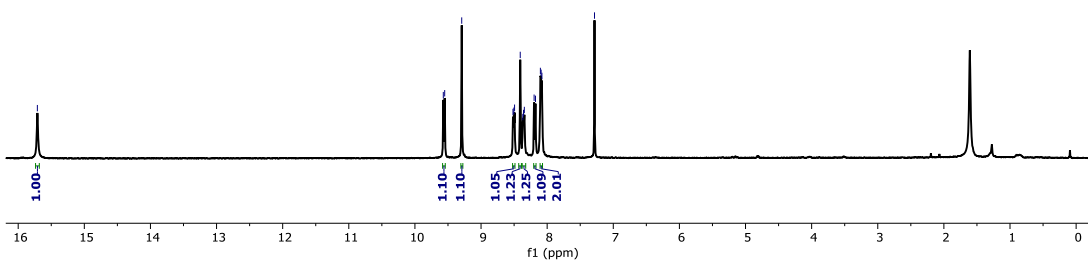

165.6  
143.5  
141.8  
140.7  
140.4  
138.9  
134.6  
133.1  
133.0  
132.8  
132.5  
132.1  
131.8  
131.0  
130.2  
130.1  
127.9  
127.8  
127.7  
127.7  
127.6  
127.6  
126.9  
126.9  
126.9  
126.8  
126.8  
125.0  
123.5  
122.3  
119.6

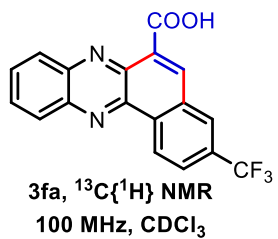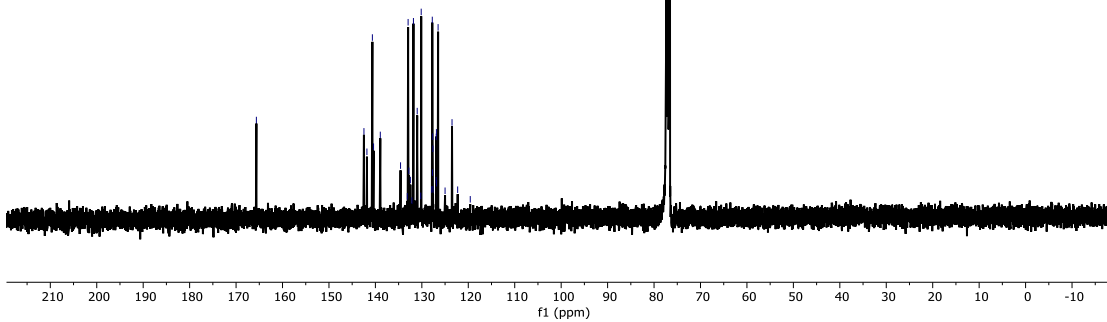

16.07

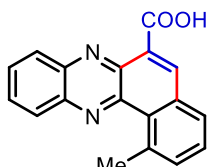

3ga,  $^1\text{H}$  NMR  
400 MHz,  $\text{CDCl}_3$

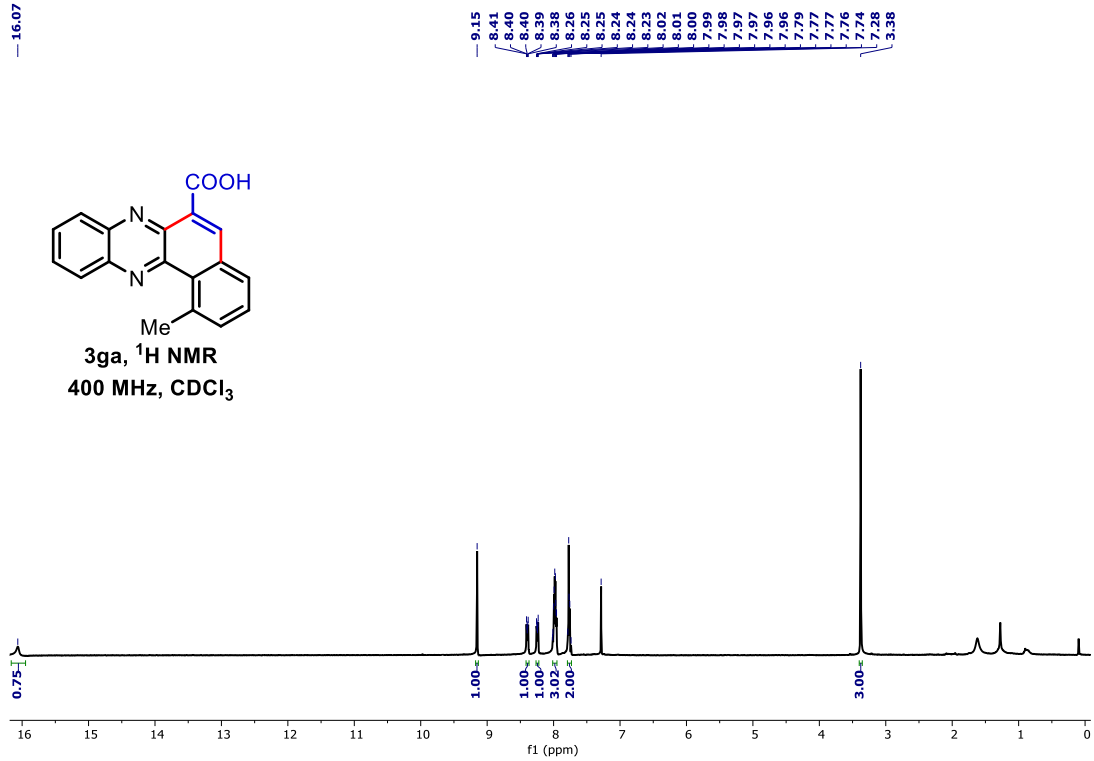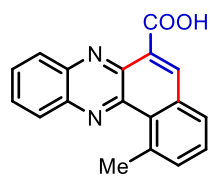

3ga,  $^{13}\text{C}\{^1\text{H}\}$  NMR  
100 MHz,  $\text{CDCl}_3$

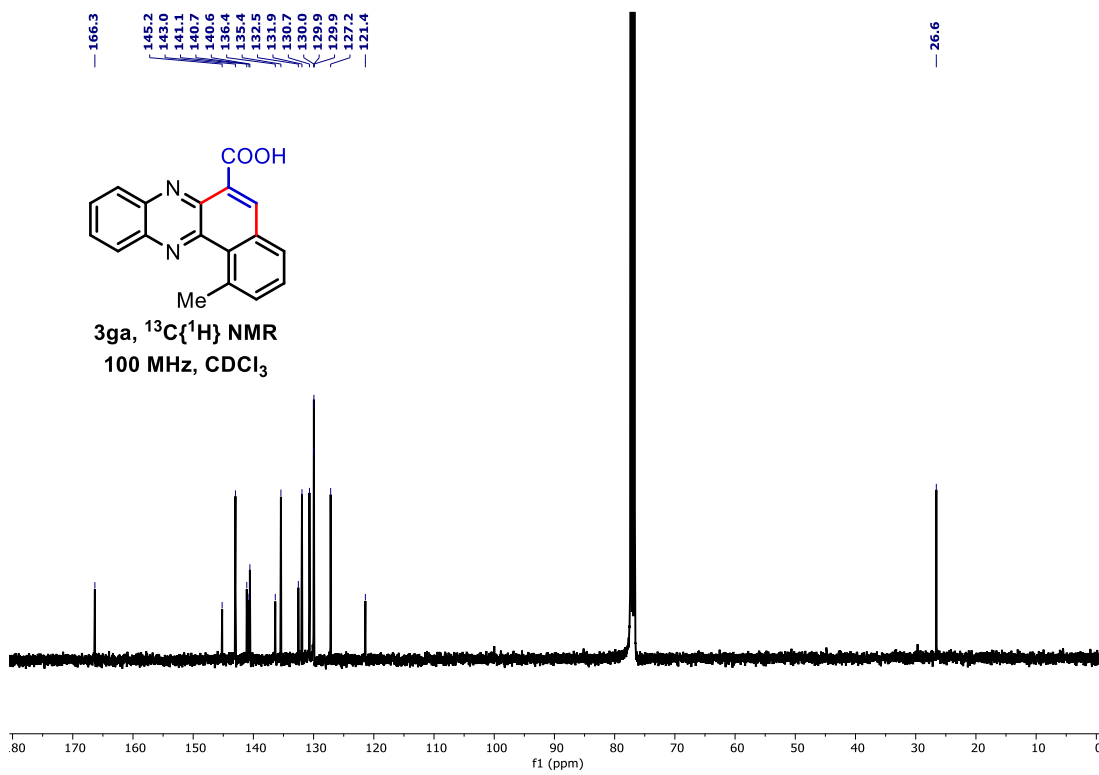

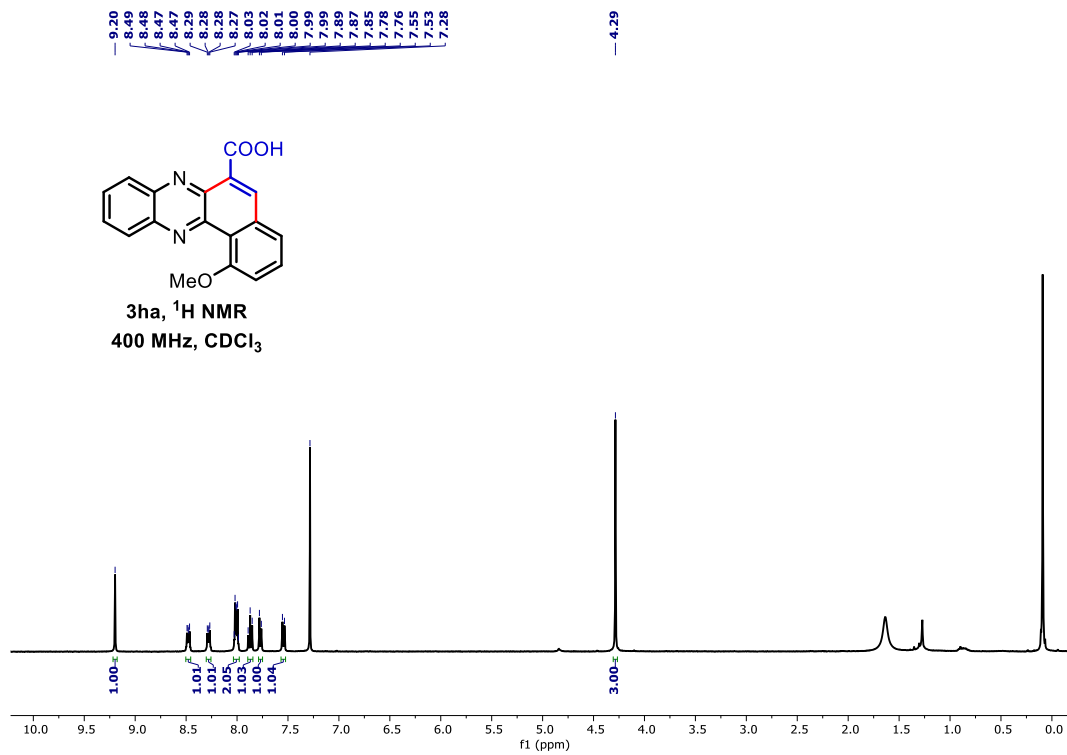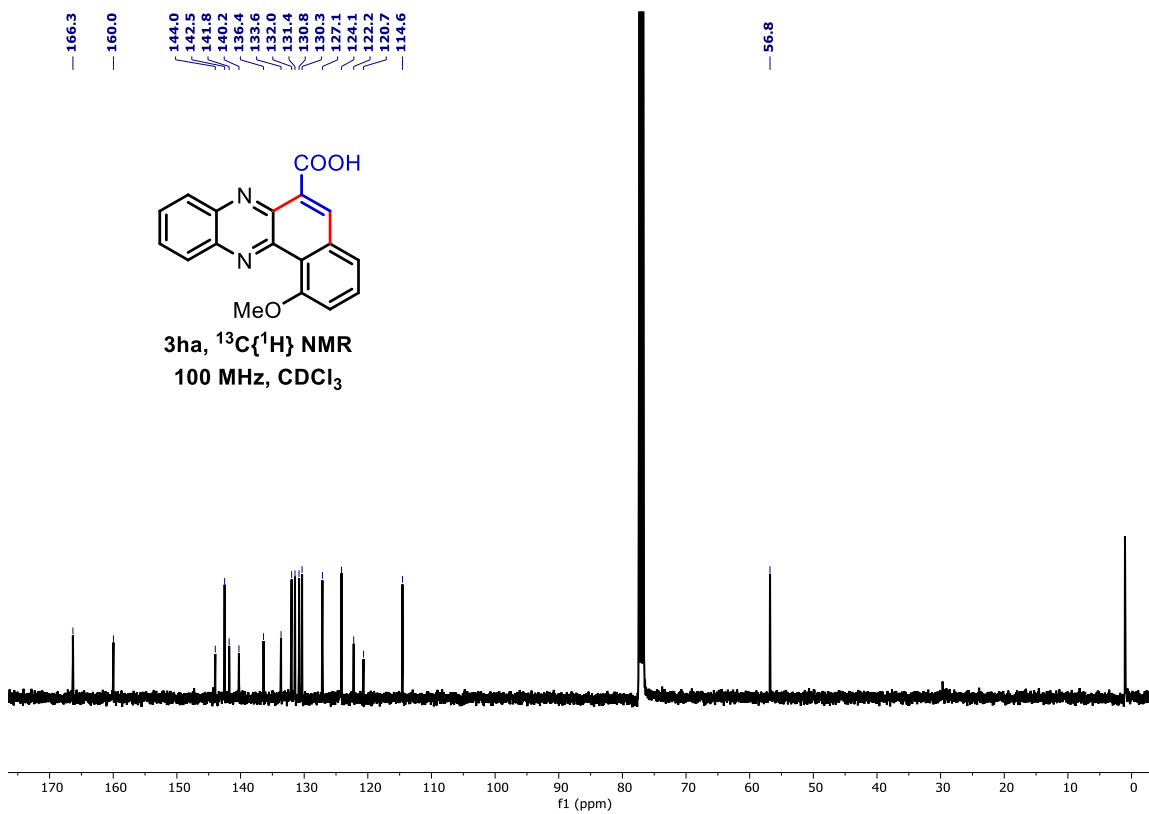

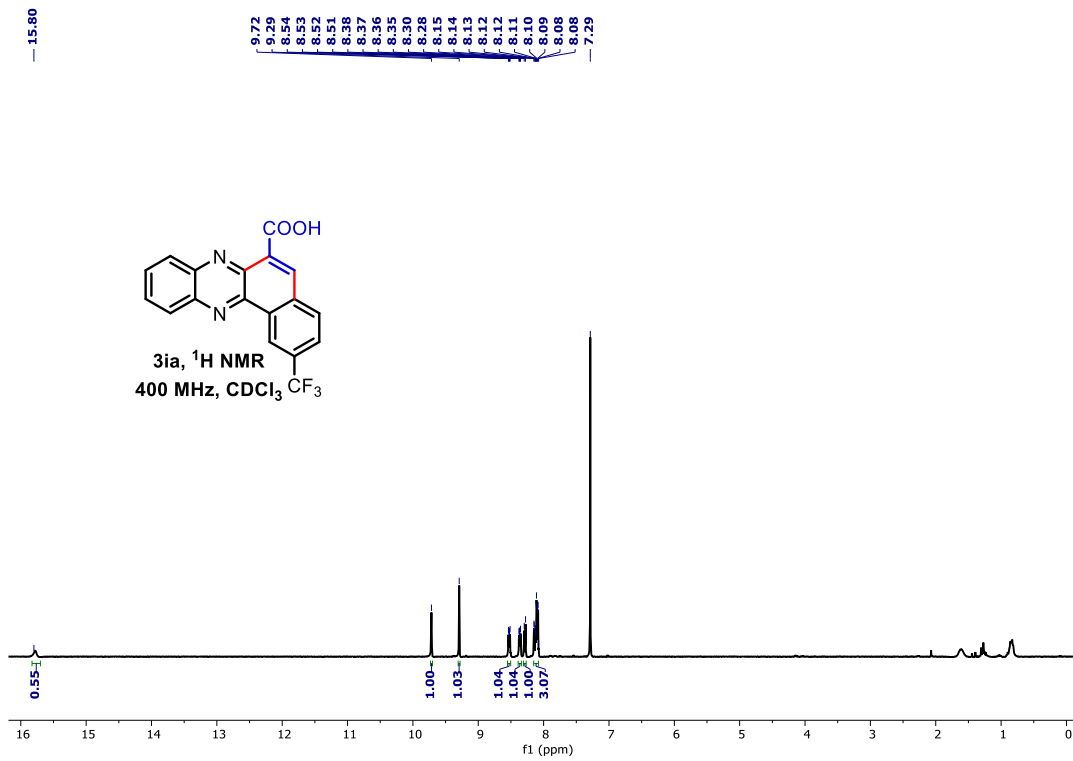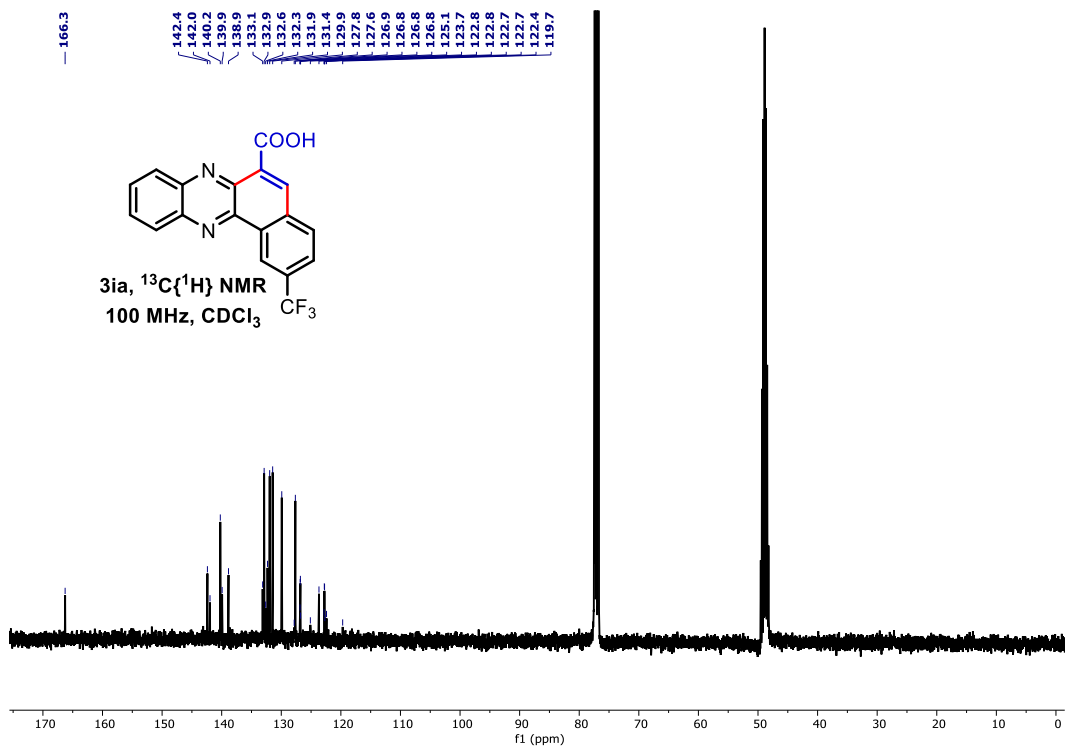



15.50

9.38  
9.36  
9.25  
8.44  
8.43  
8.27  
8.25  
8.15  
8.13  
8.03  
8.02  
8.01  
7.99  
7.99  
7.96  
7.96  
7.94  
7.94  
7.93  
7.93  
7.28

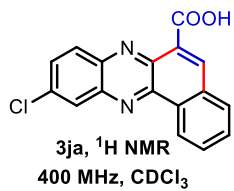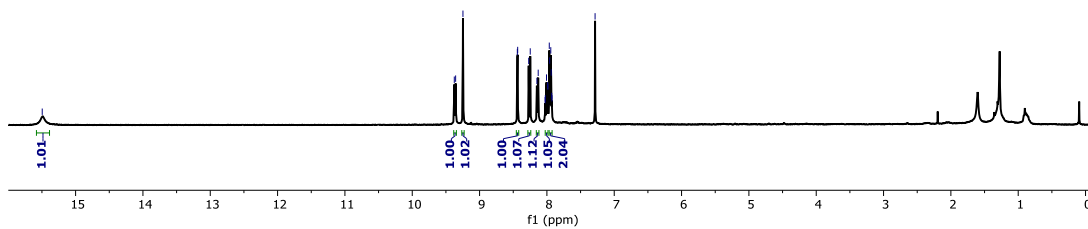

166.1

143.4  
142.3  
142.2  
140.3  
137.4  
136.9  
133.3  
132.1  
131.5  
131.4  
131.3  
130.9  
128.8  
125.7  
121.8

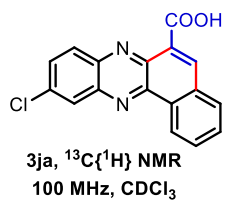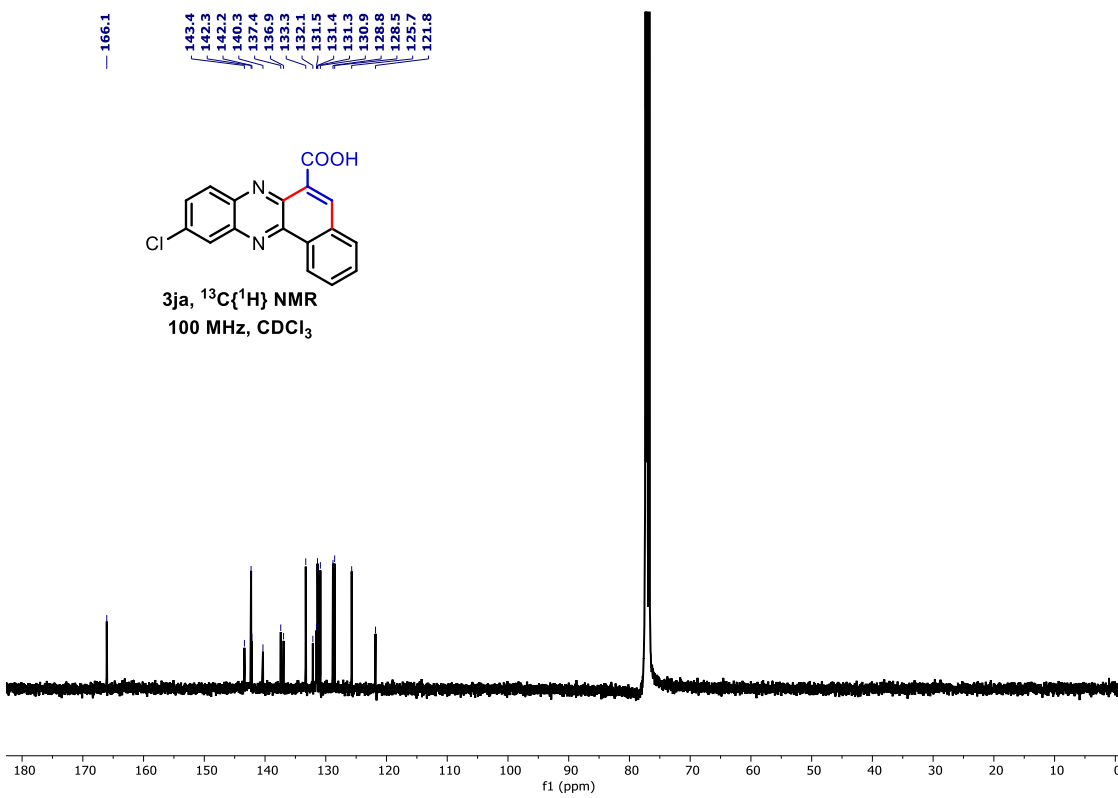

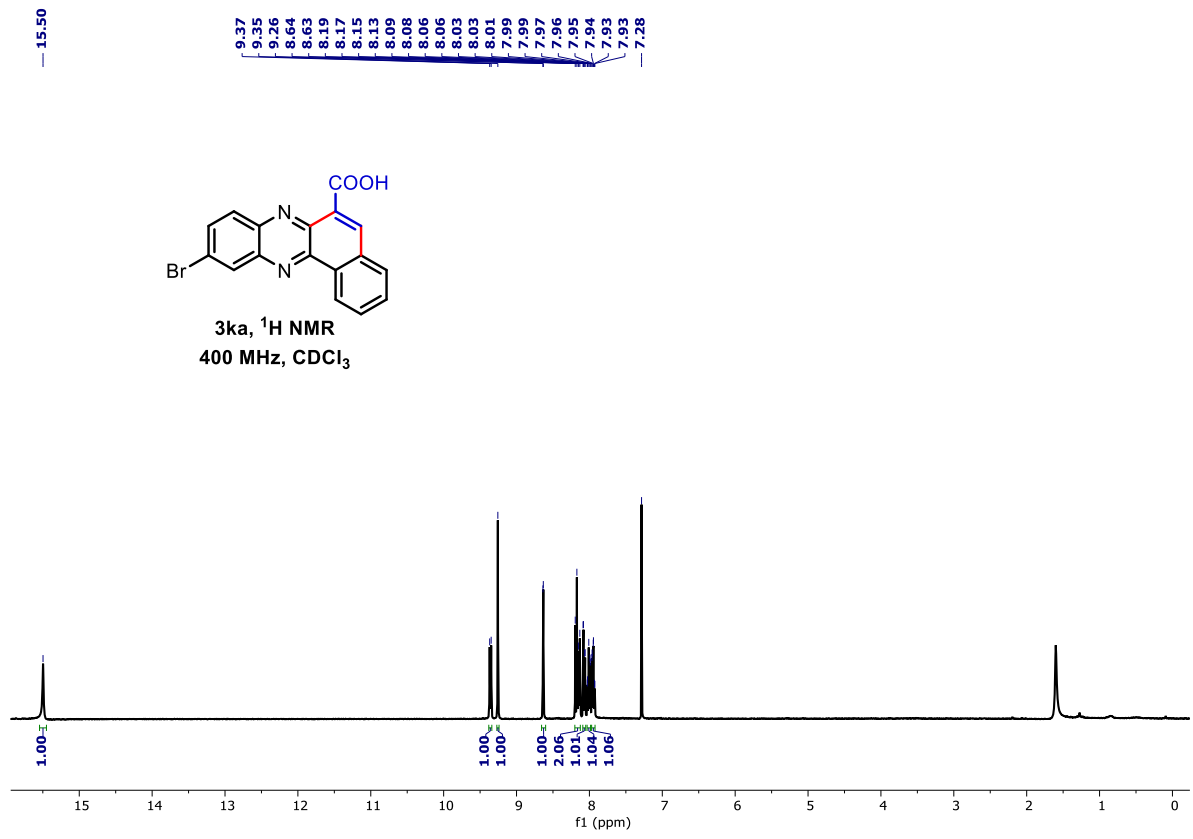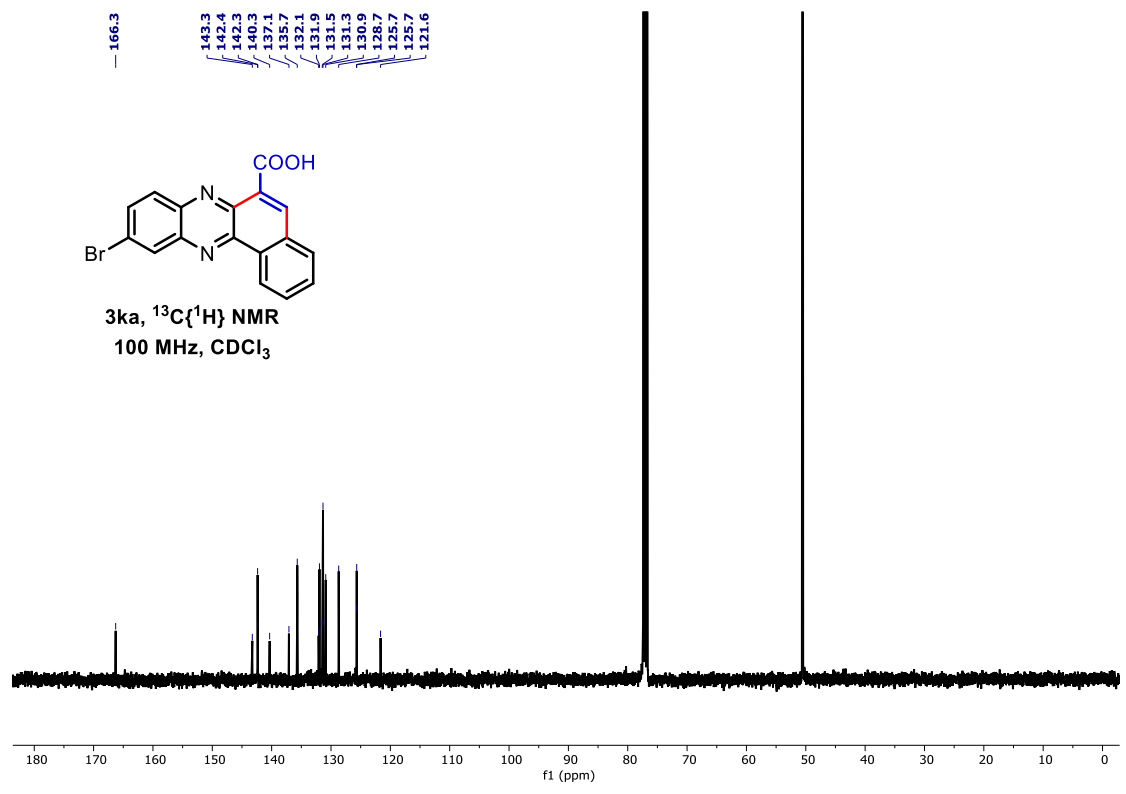

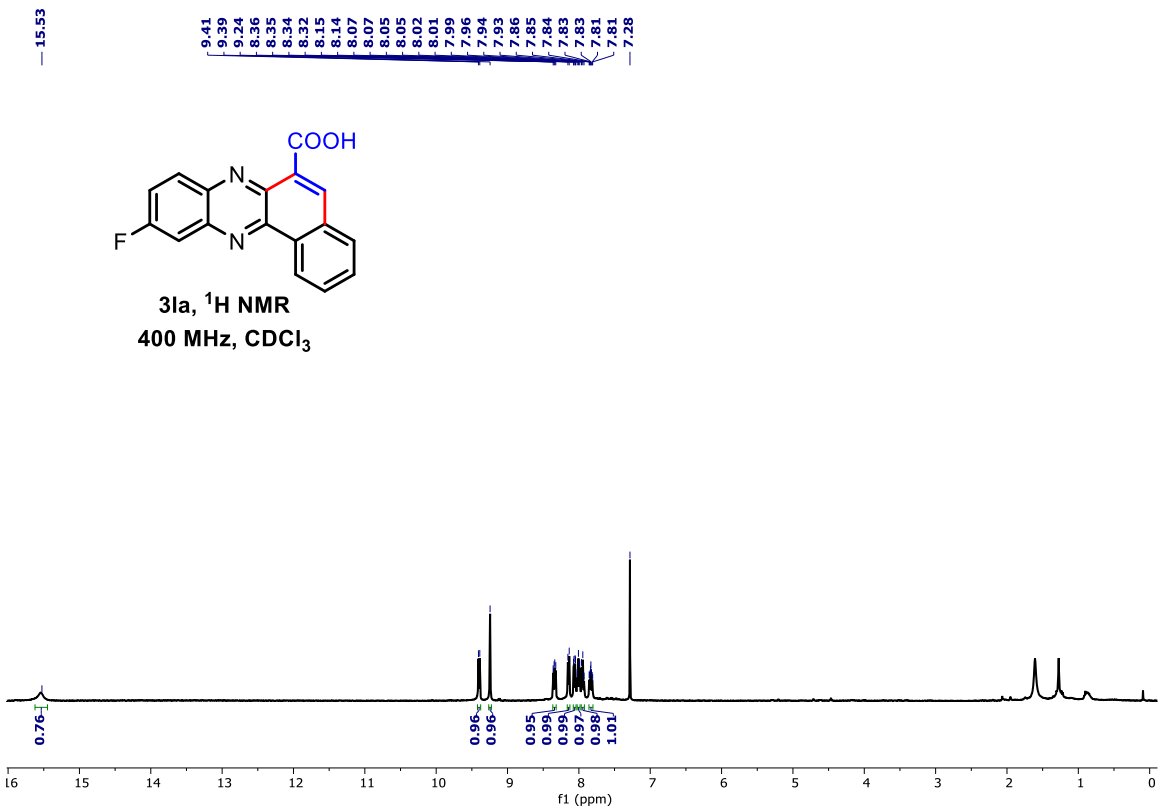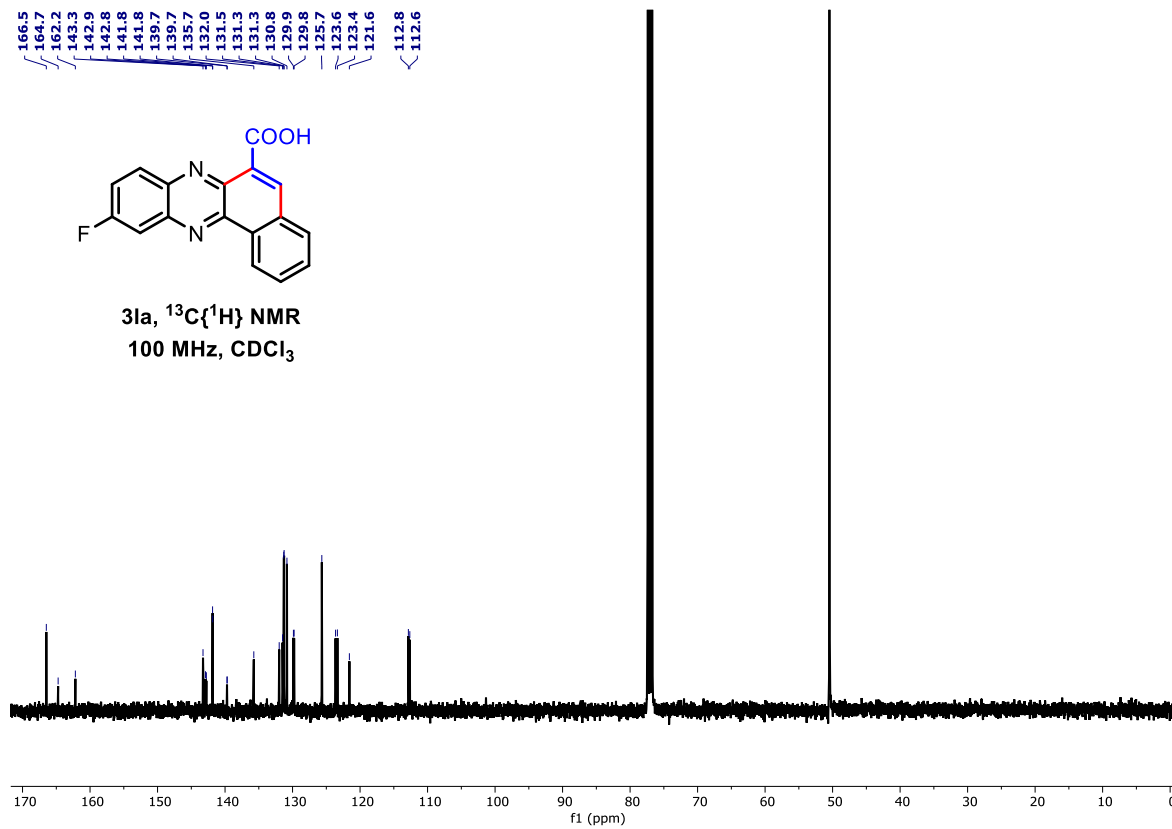

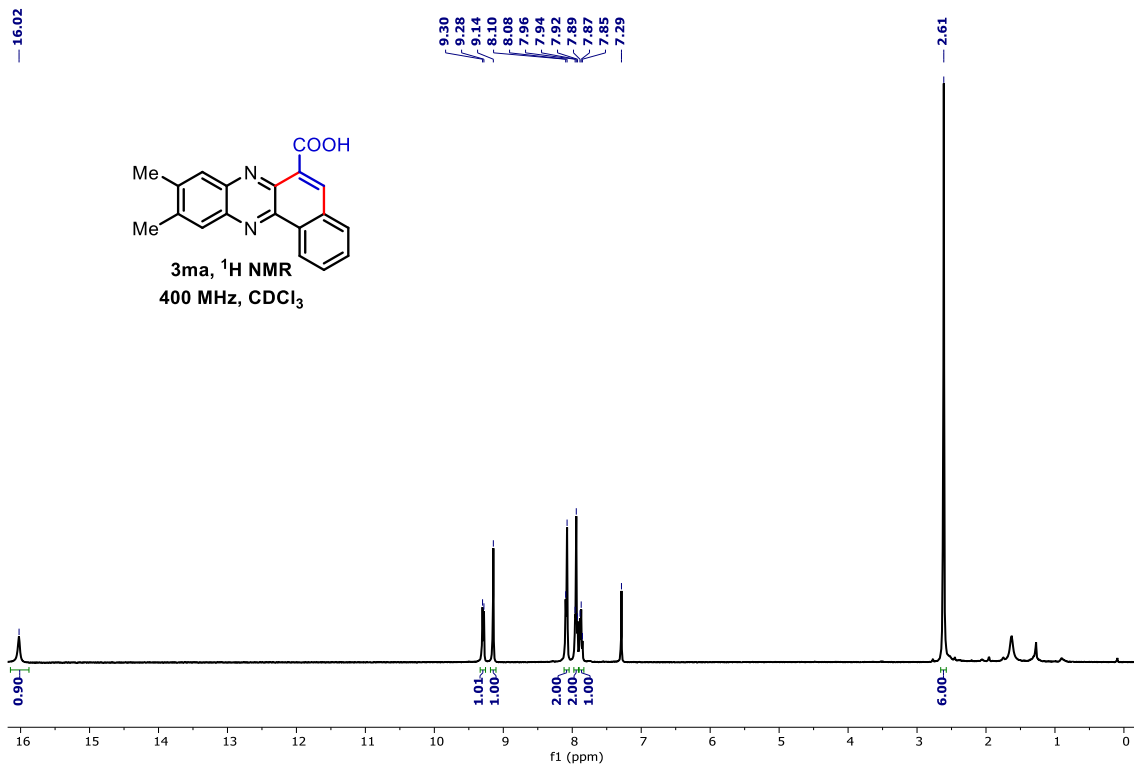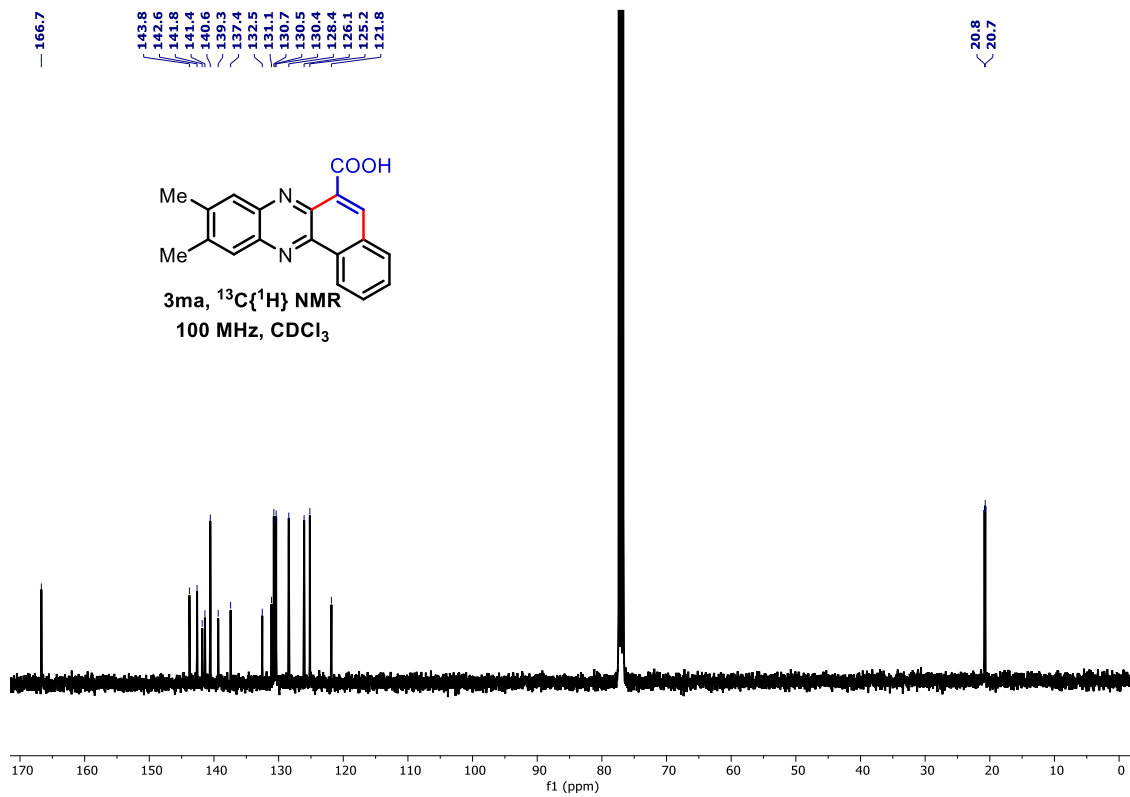

15.26

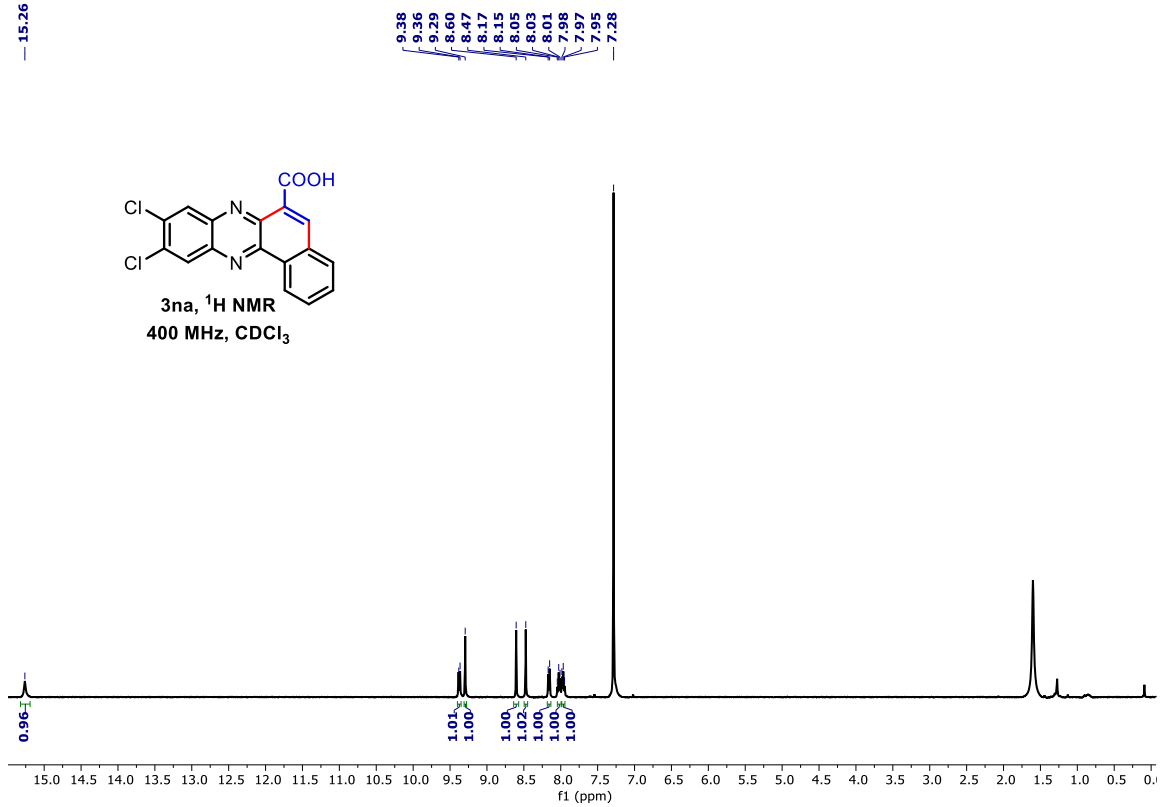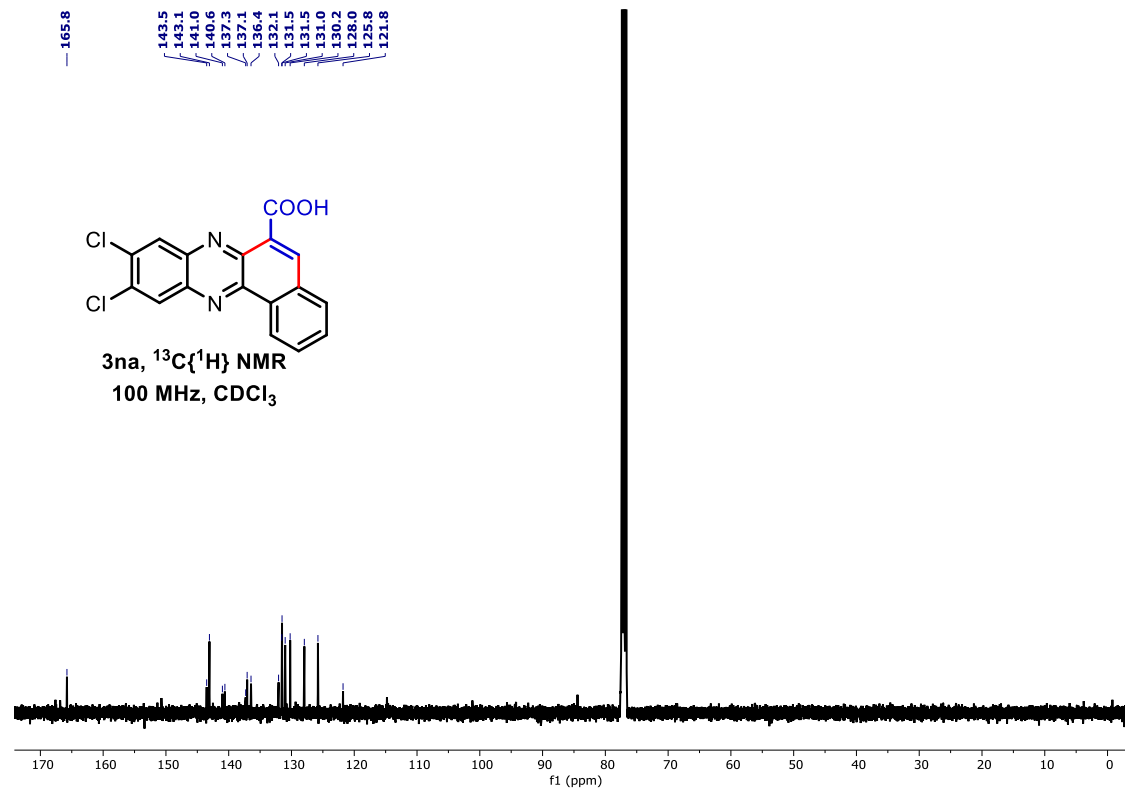

15.77

9.30  
8.50  
8.48  
8.37  
8.35  
8.34  
8.26  
8.25  
8.02  
8.00  
7.98  
7.97  
7.28

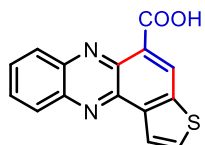

30a,  $^1\text{H}$  NMR  
400 MHz,  $\text{CDCl}_3$

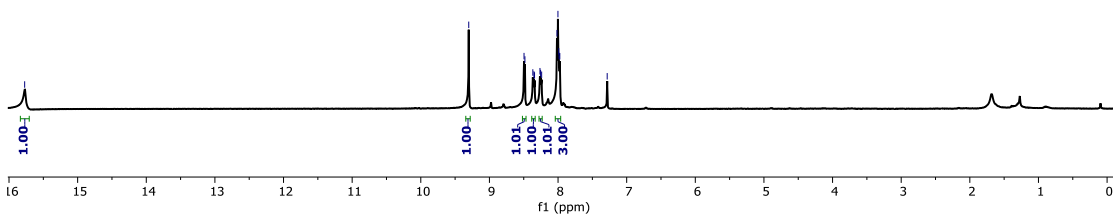

166.2

142.5  
140.2  
140.1  
139.3  
139.1  
138.4  
133.5  
132.7  
132.1  
131.4  
129.8  
127.7  
124.8  
120.1

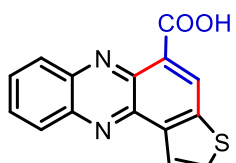

30a,  $^{13}\text{C}\{^1\text{H}\}$  NMR  
100 MHz,  $\text{CDCl}_3$

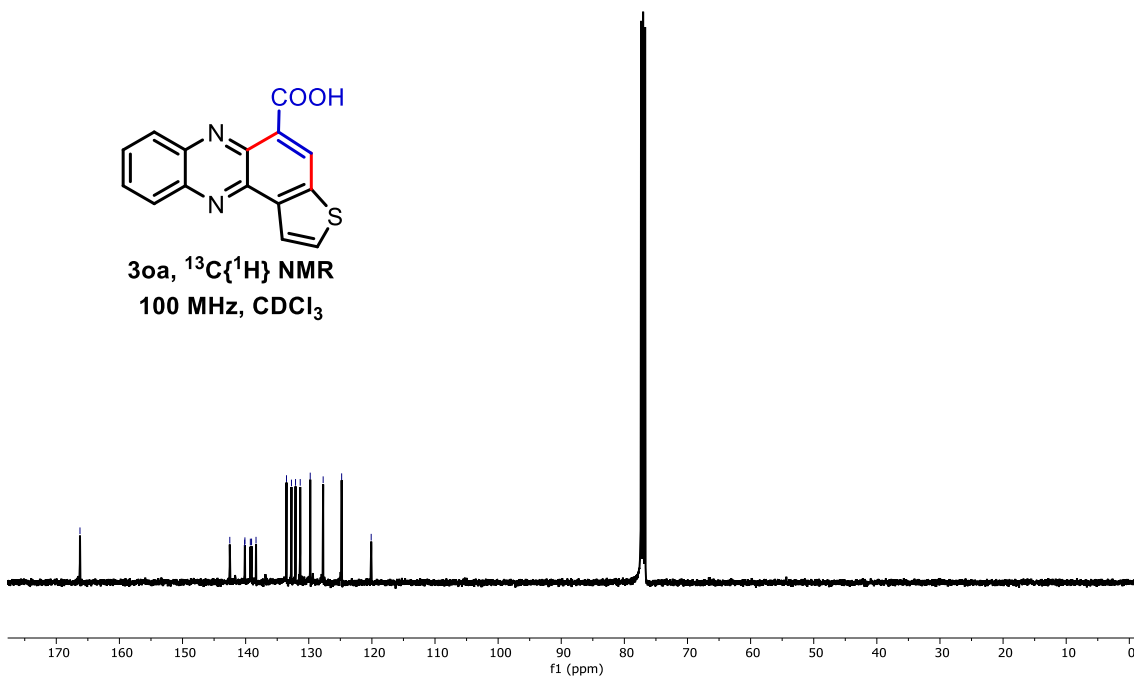

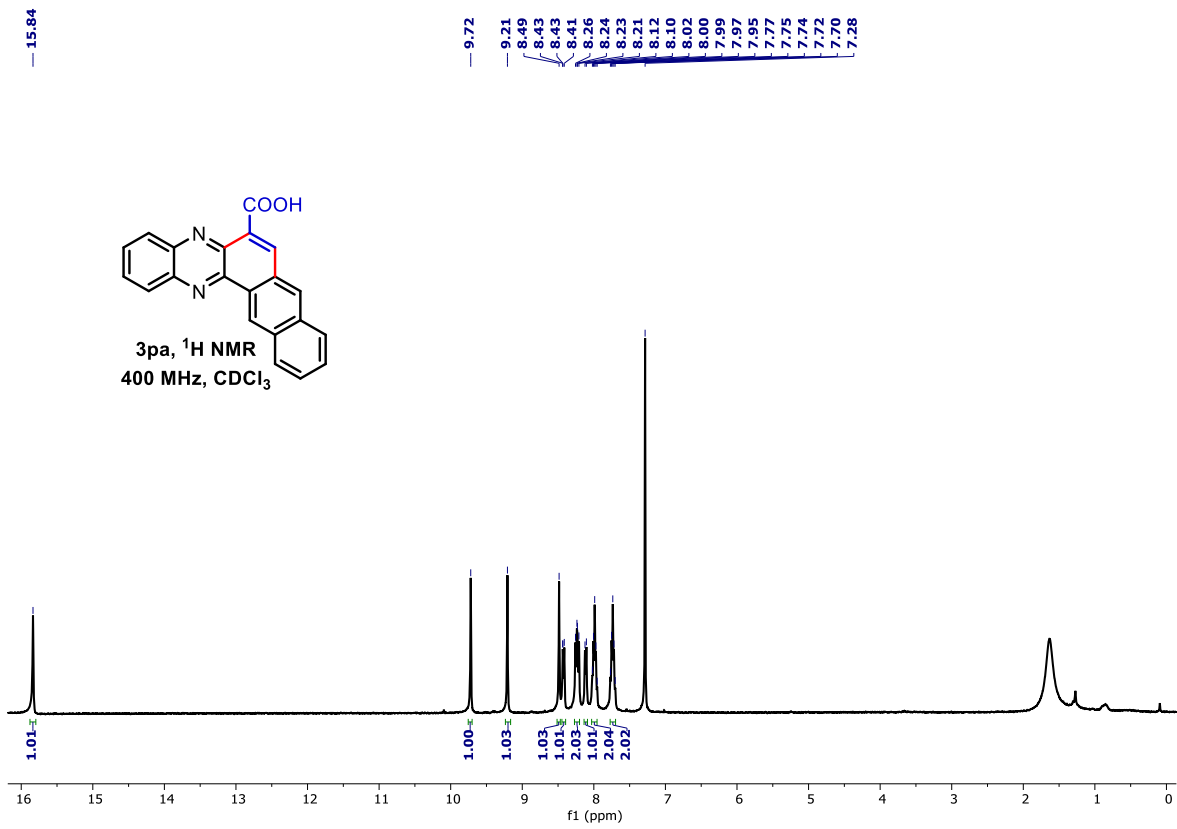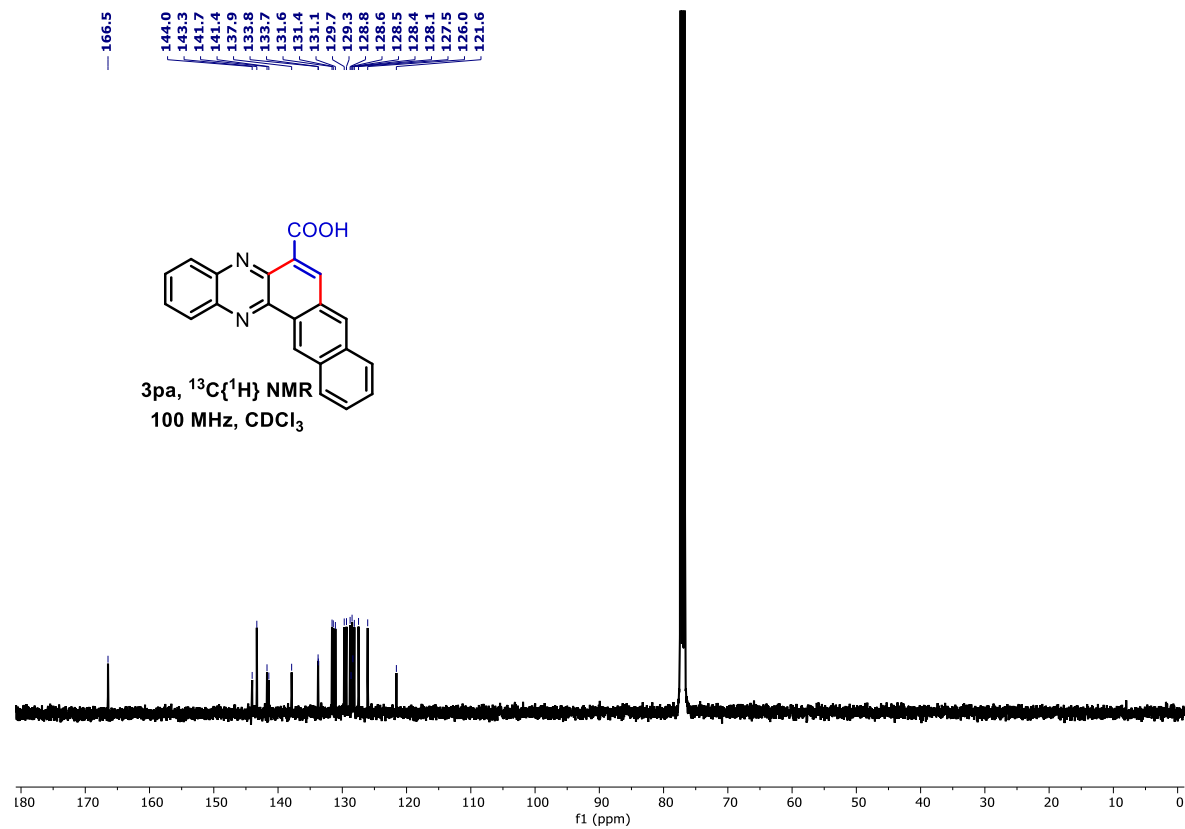

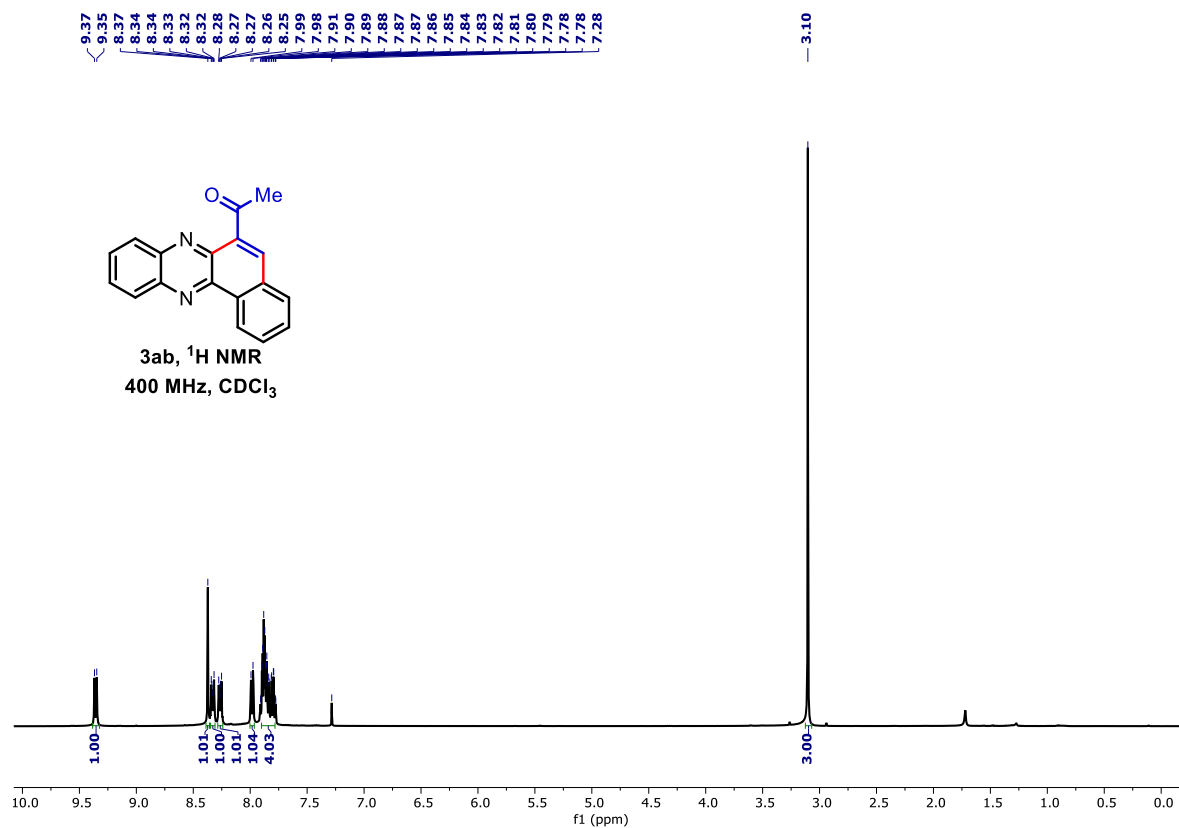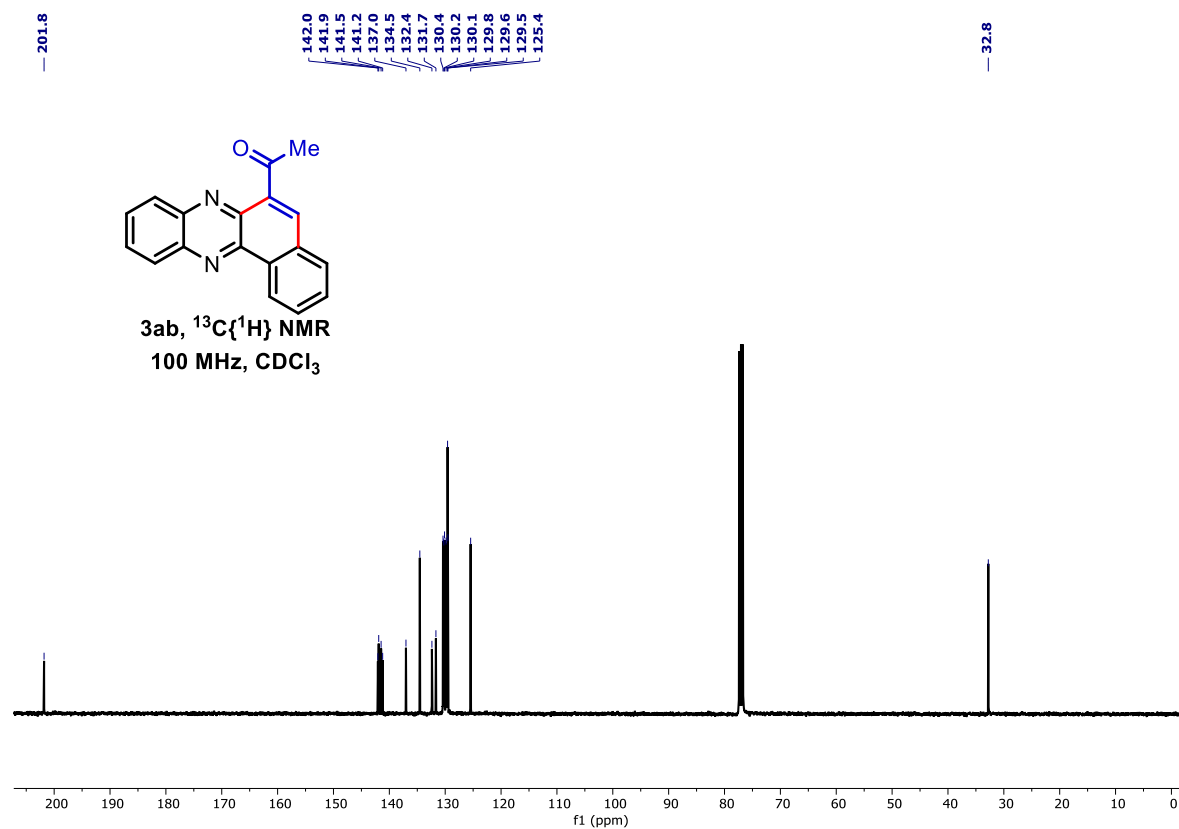



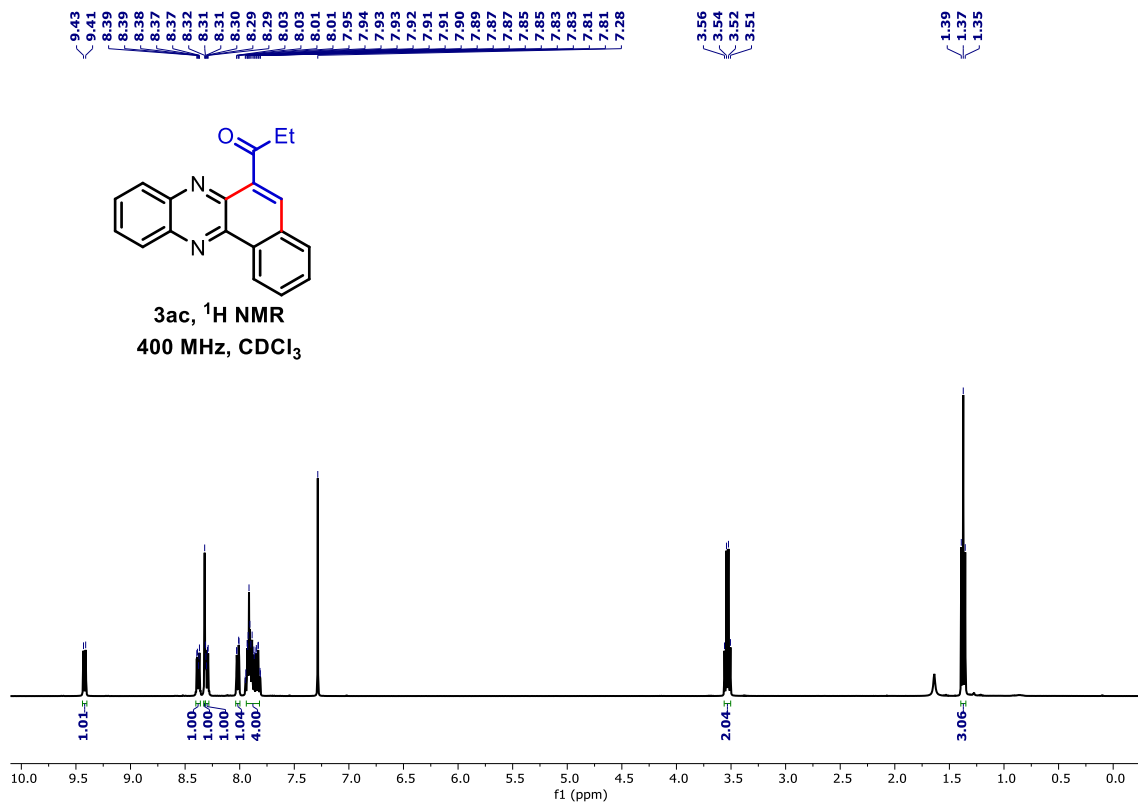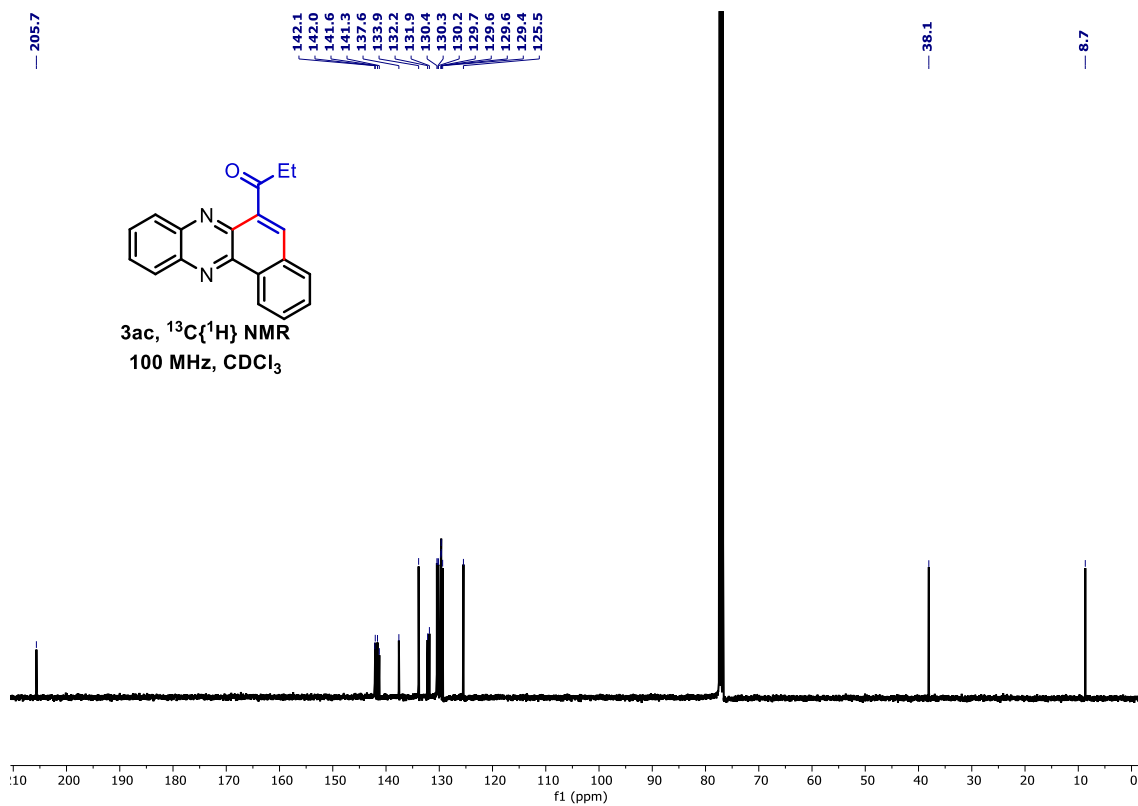

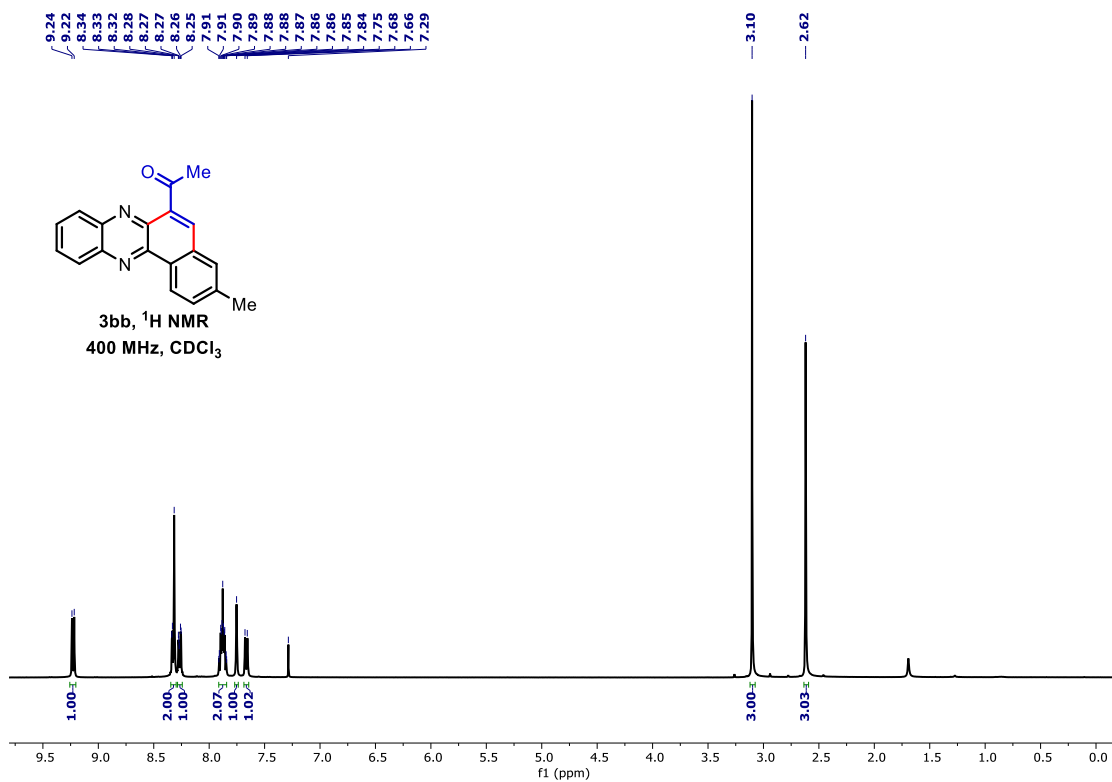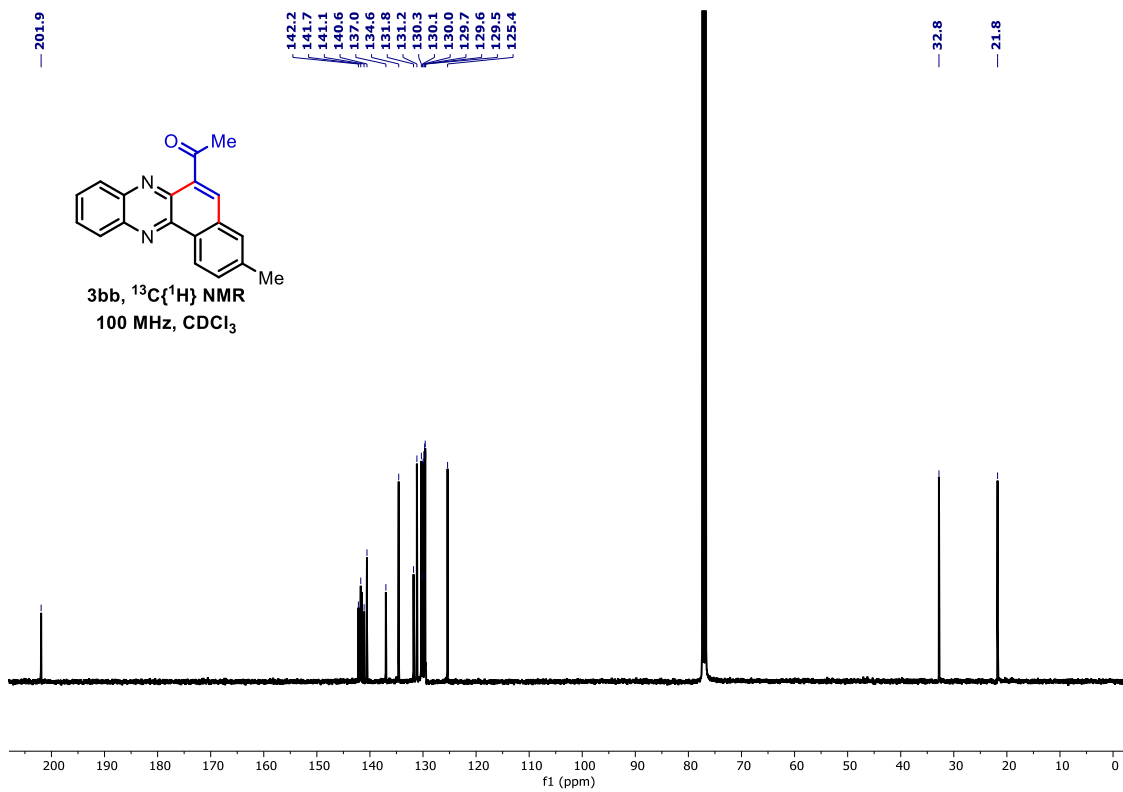

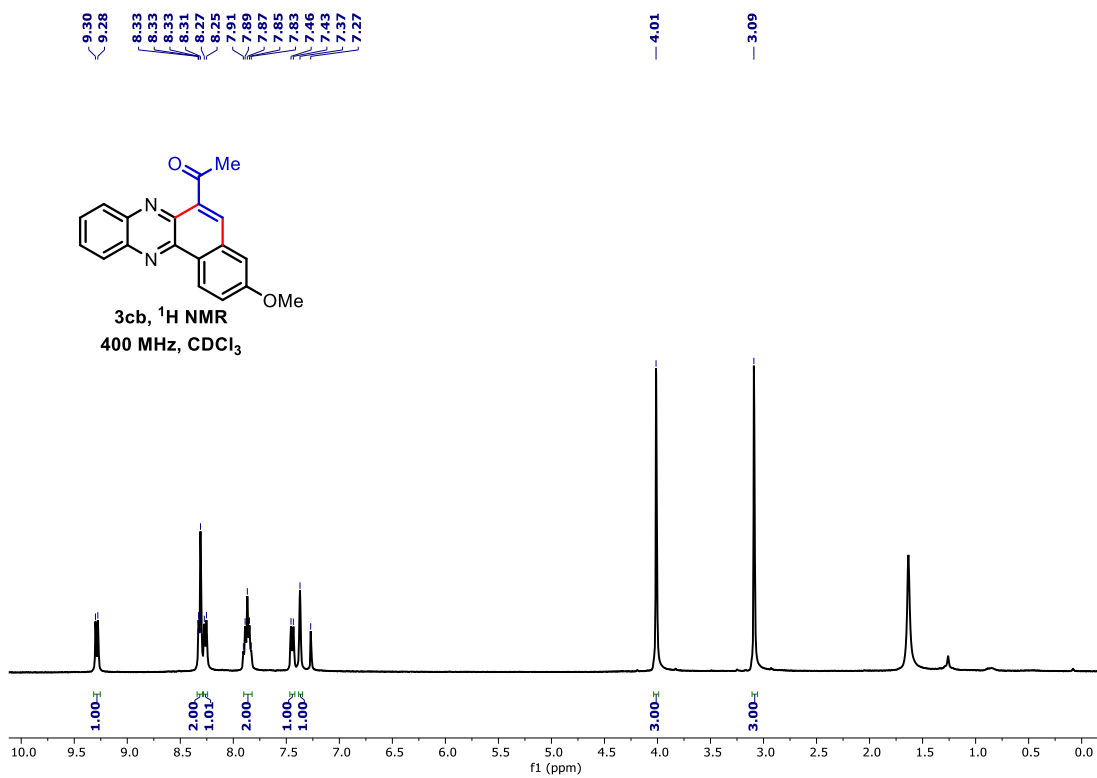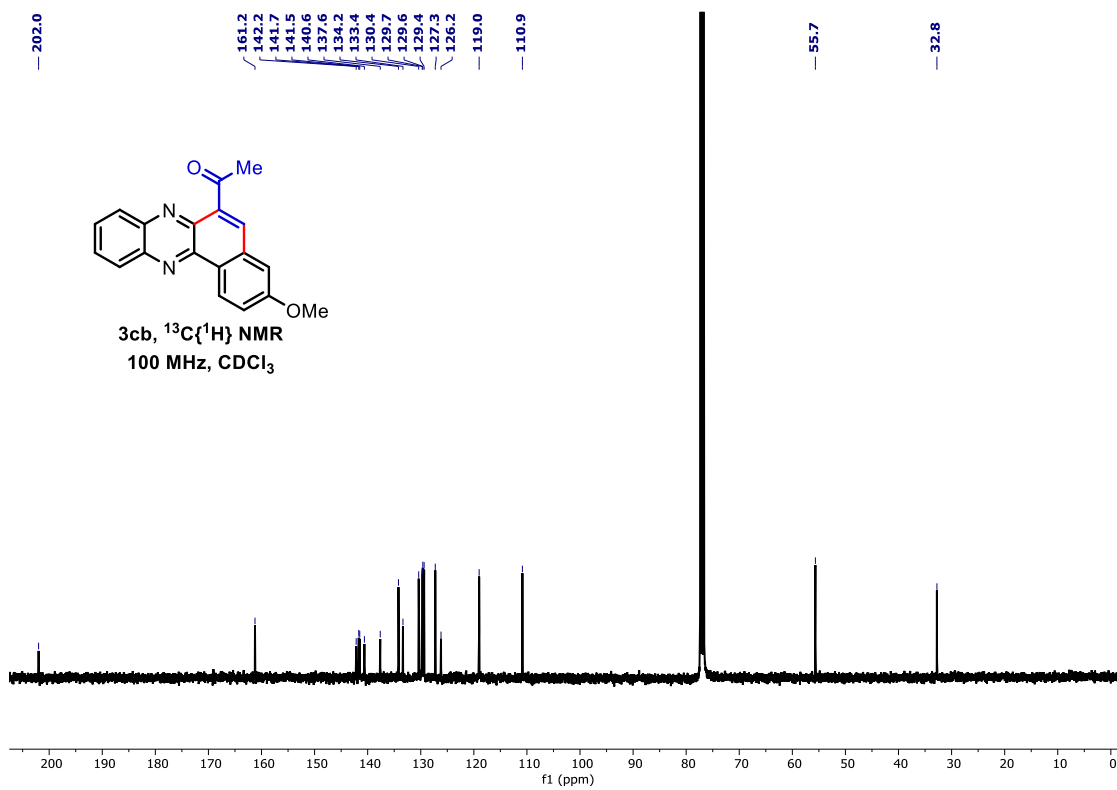

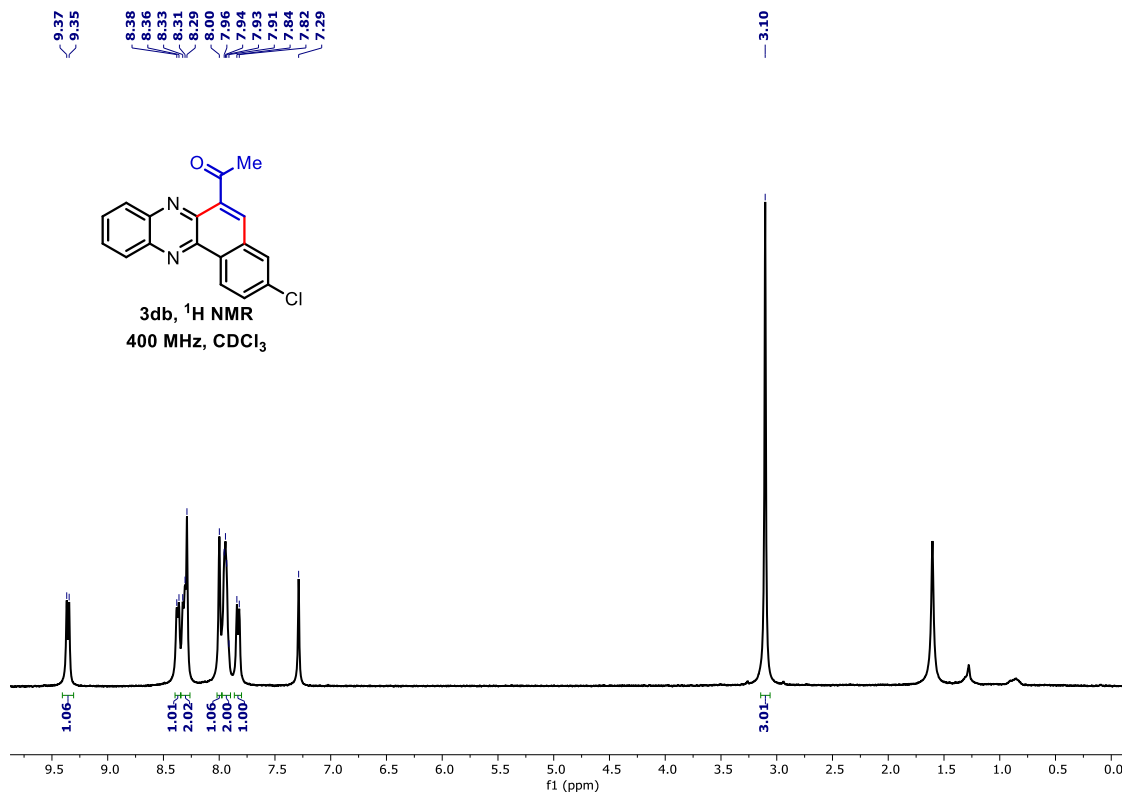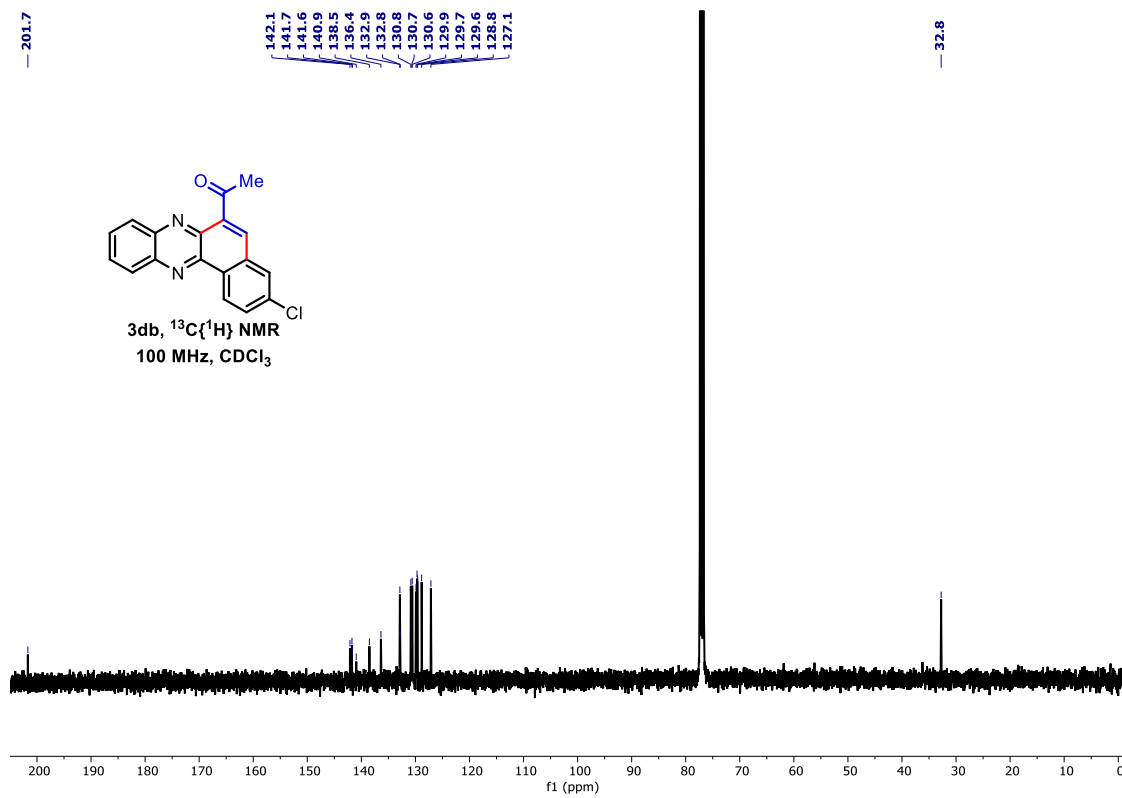

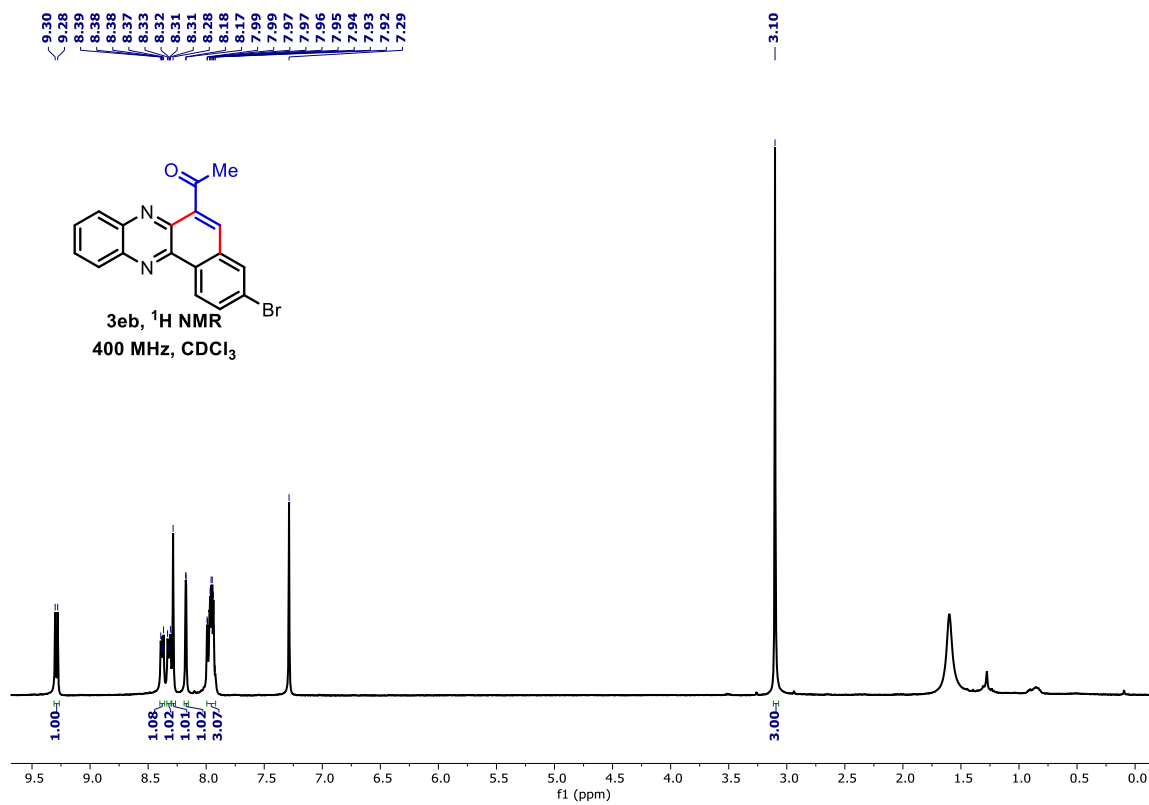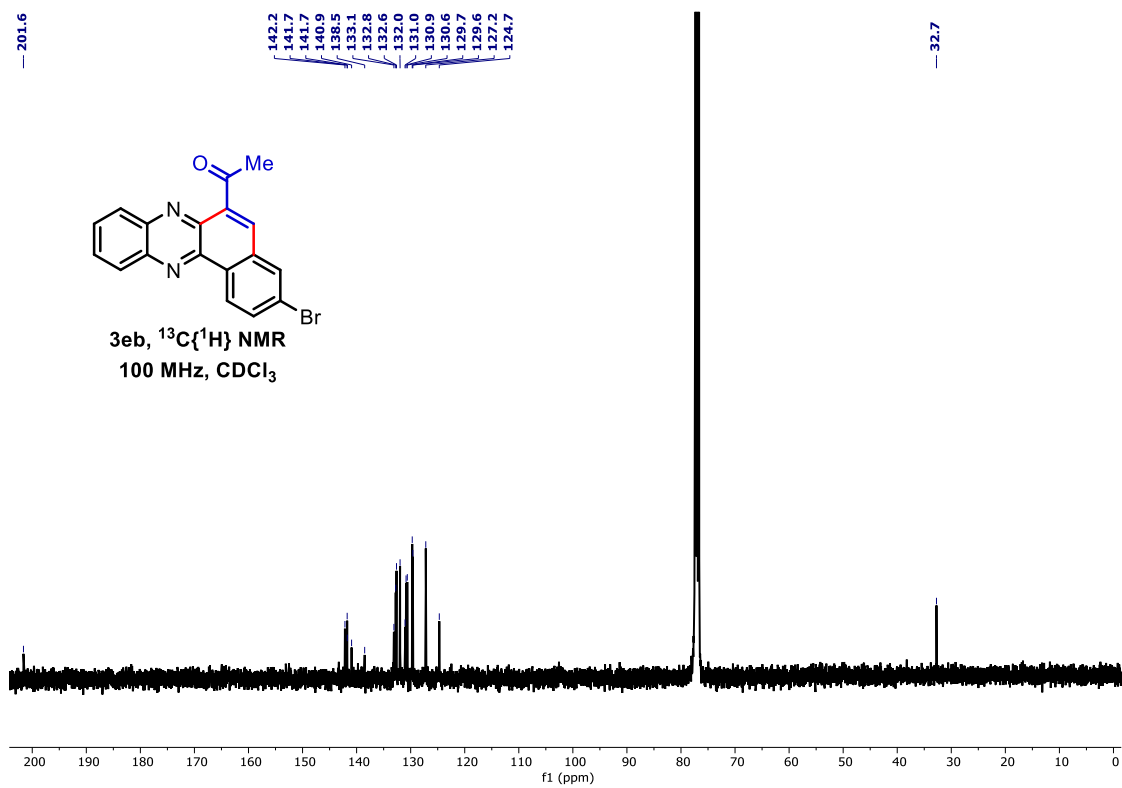

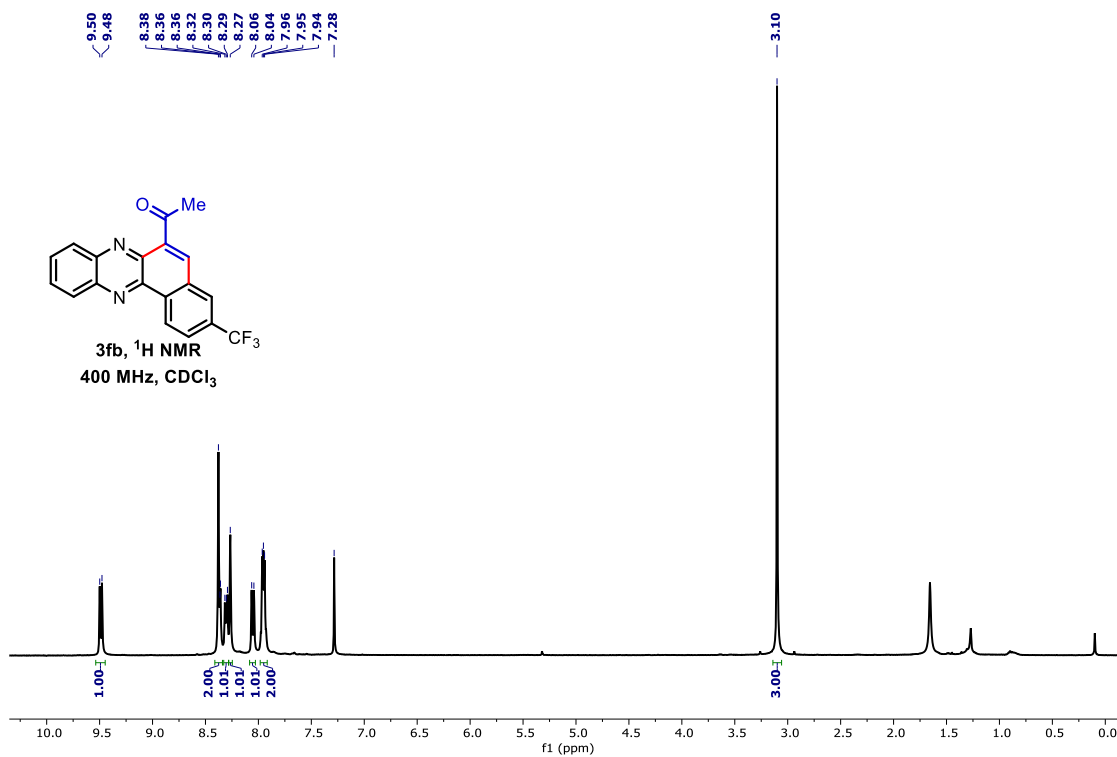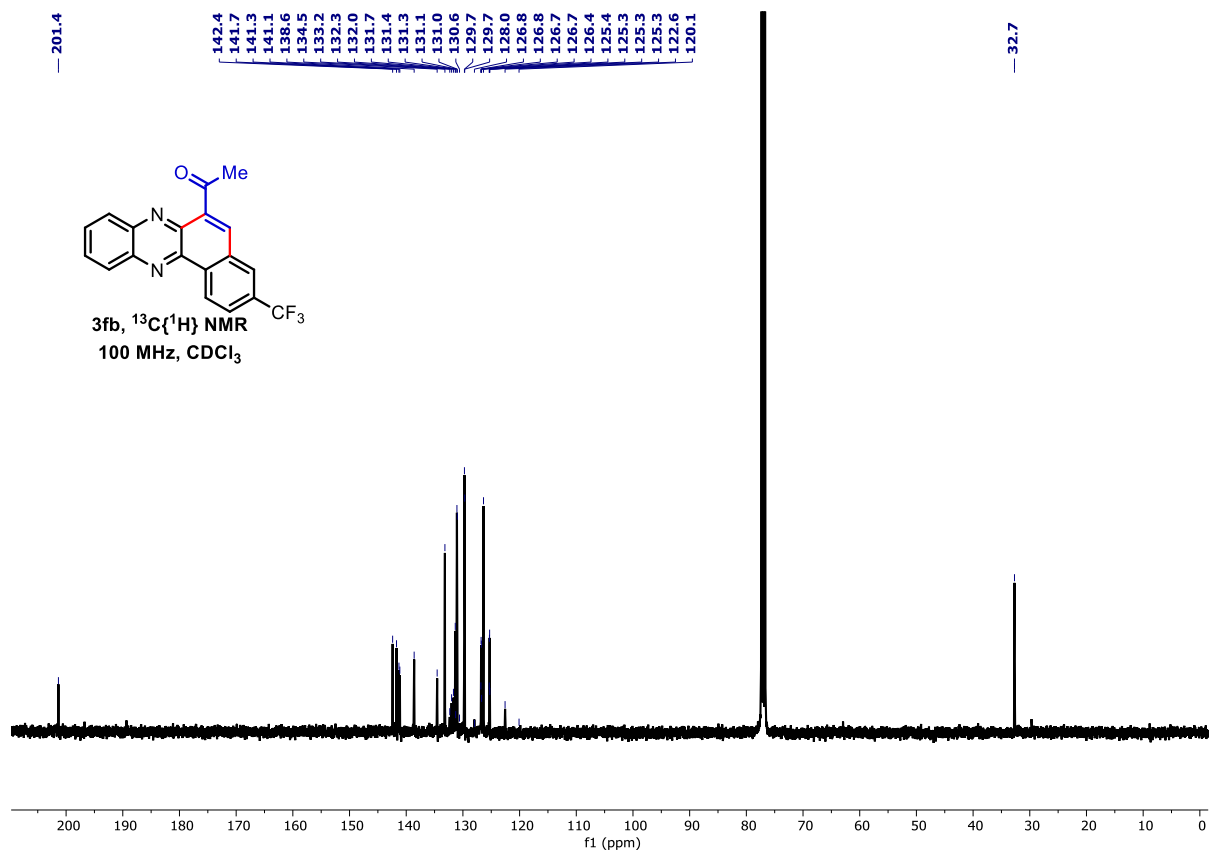

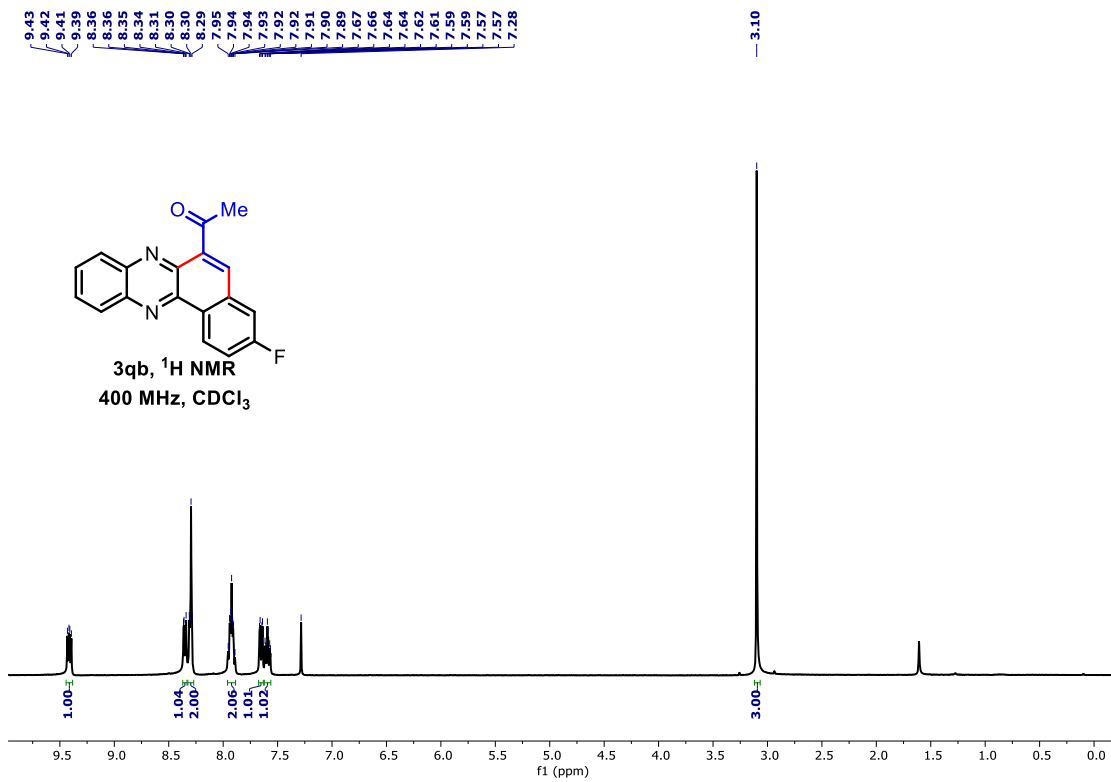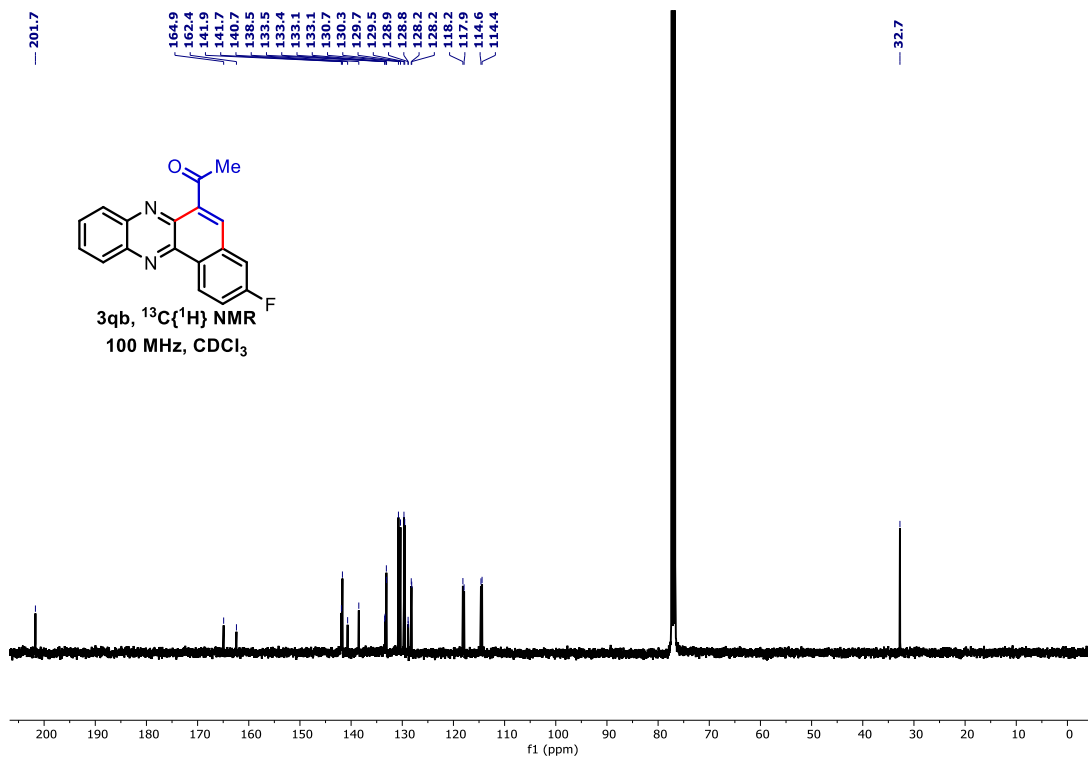

10.32

9.02  
9.00  
8.98  
8.18  
8.06  
8.04  
8.00  
7.98  
7.97  
7.95  
7.93  
7.71  
7.69  
7.67  
7.64  
7.62  
7.60  
7.37  
7.35  
7.33  
7.29

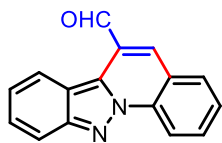

5aa, <sup>1</sup>H NMR  
400 MHz, CDCl<sub>3</sub>

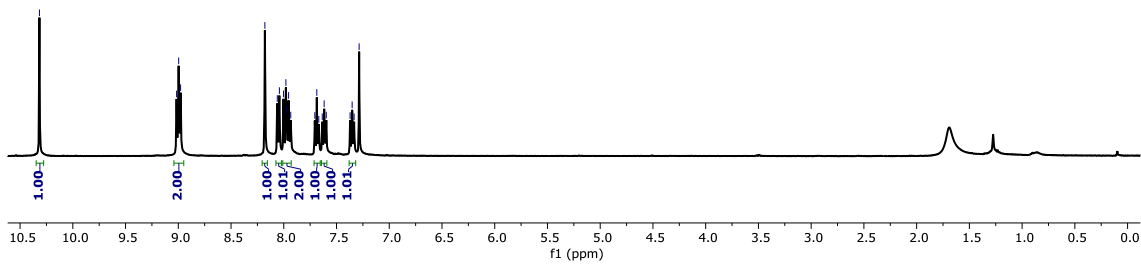

189.8

149.8  
135.8  
134.3  
132.9  
129.9  
128.6  
128.4  
126.8  
124.3  
123.1  
121.8  
117.9  
117.2  
116.6

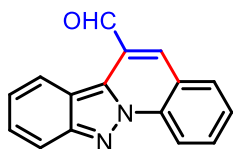

5aa, <sup>13</sup>C{<sup>1</sup>H} NMR  
100 MHz, CDCl<sub>3</sub>

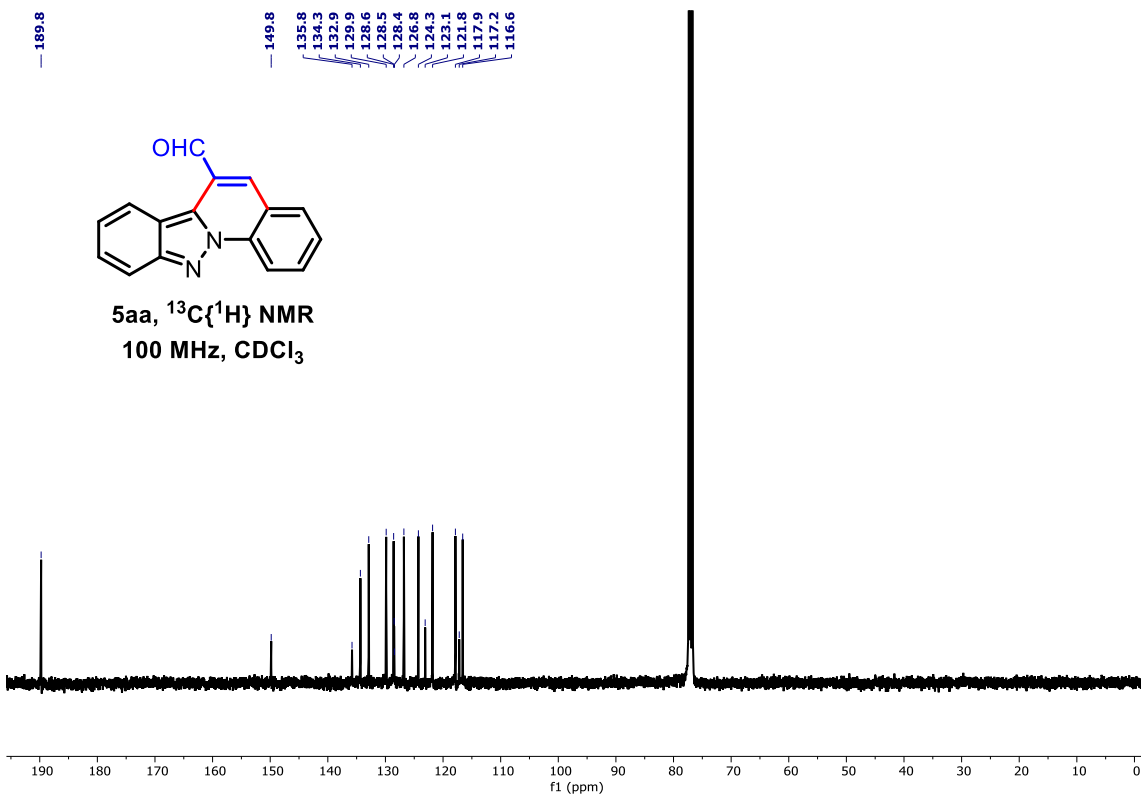



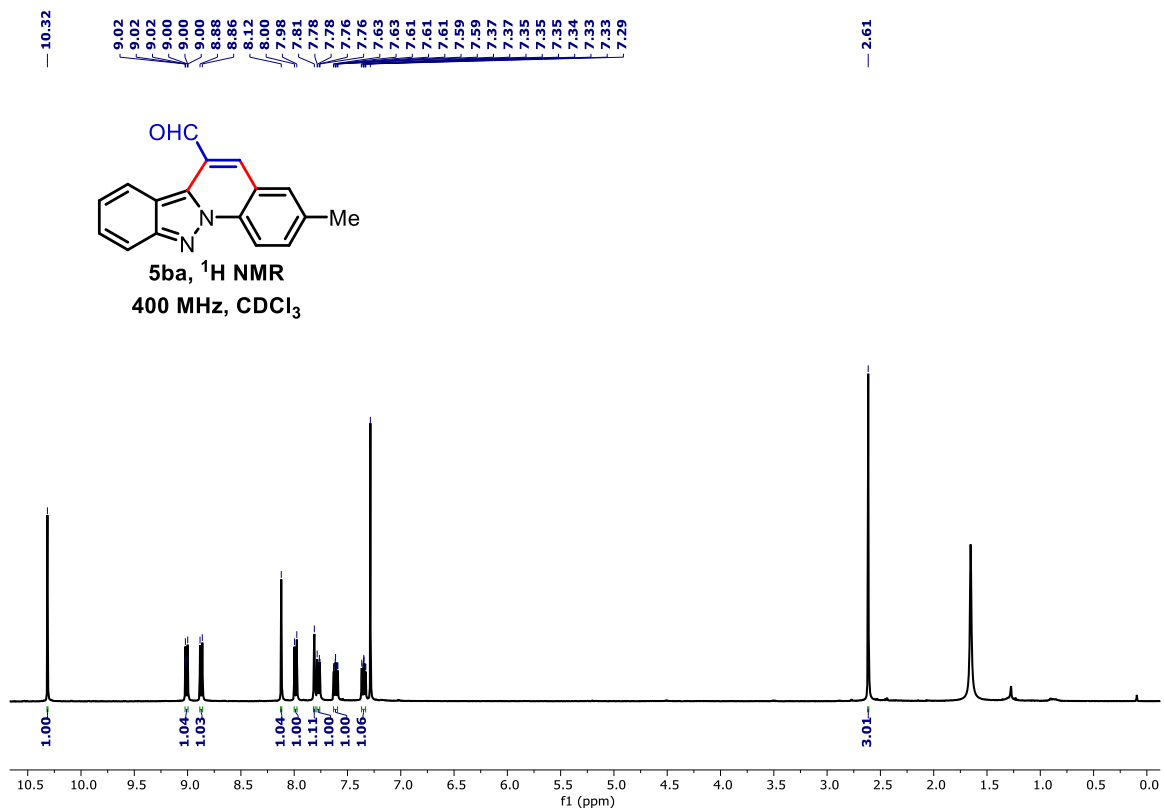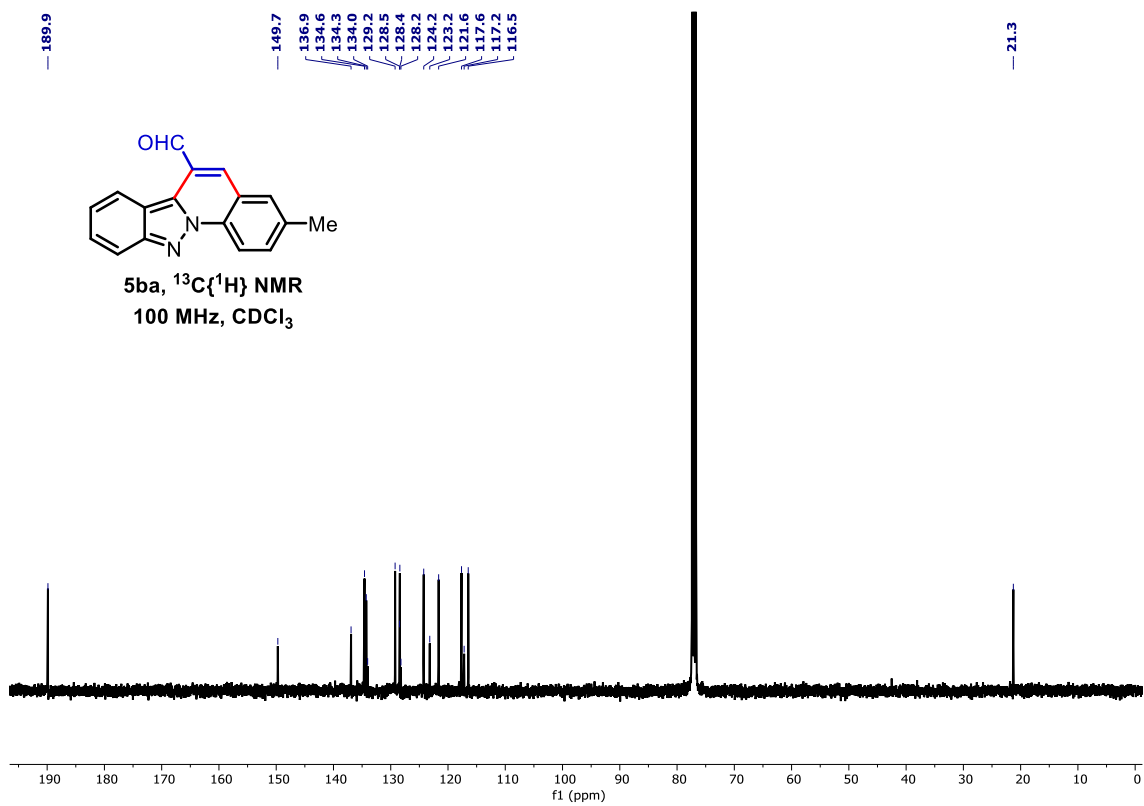

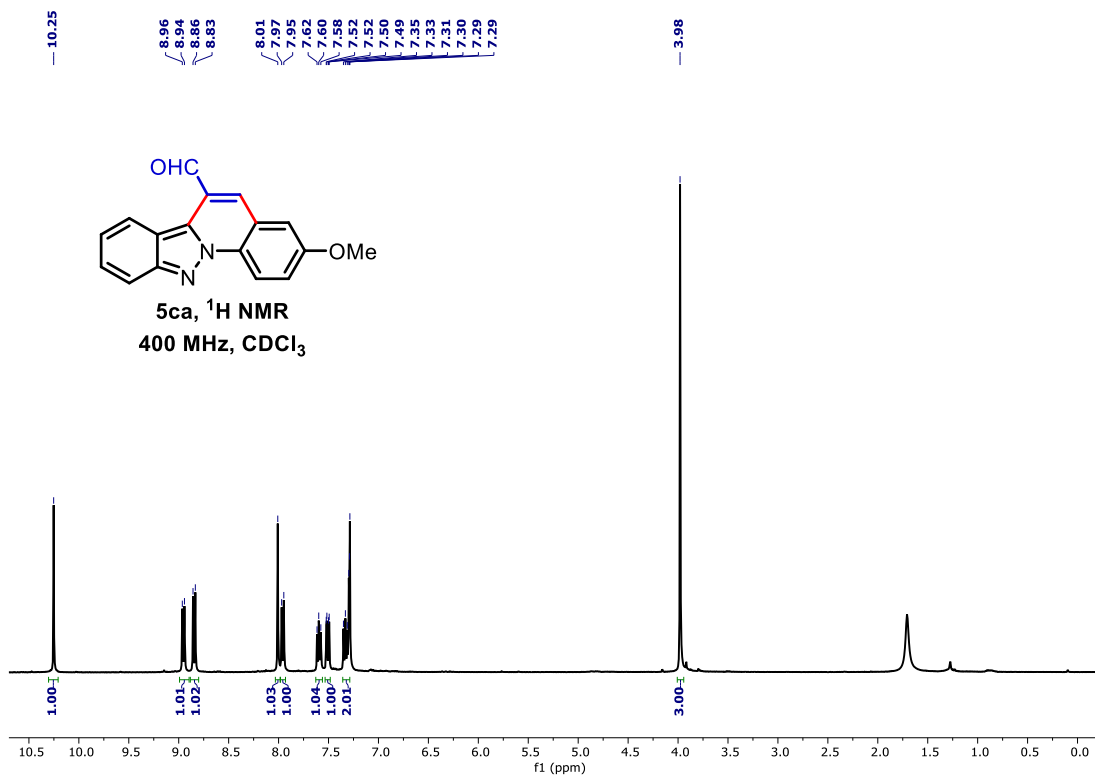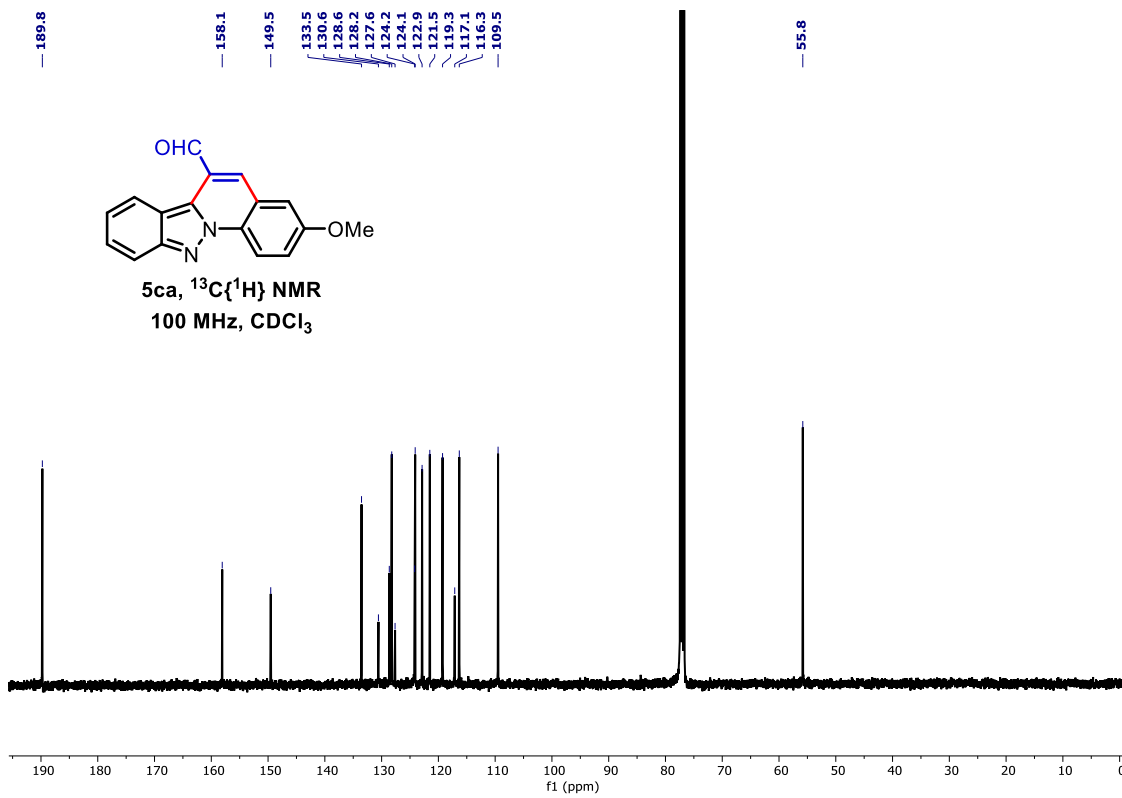

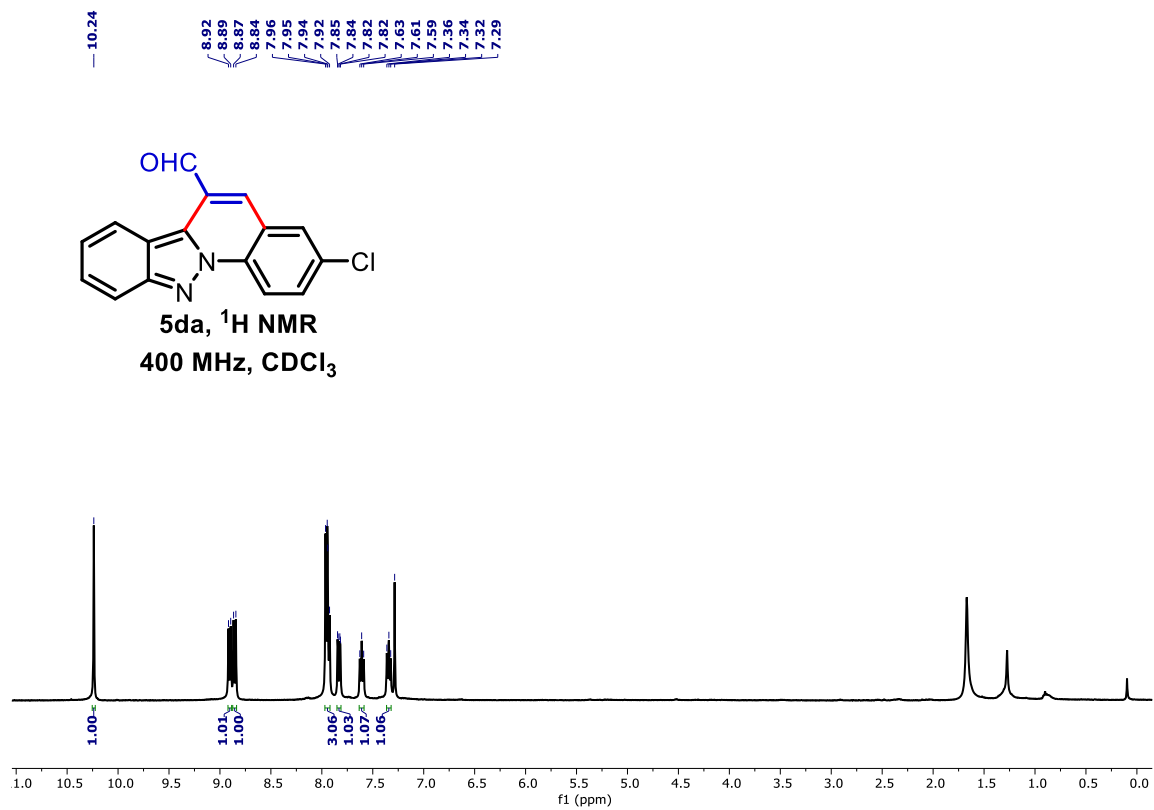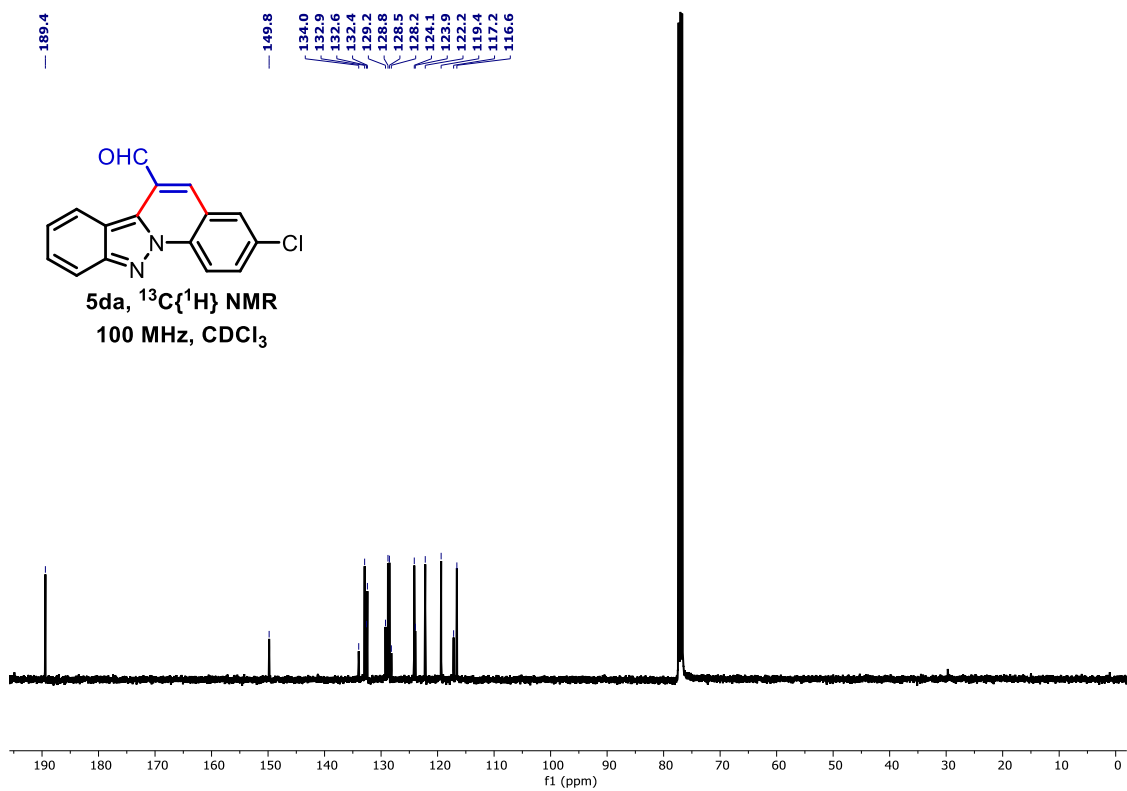

10.30

8.97  
8.95  
8.86  
8.84  
8.18  
8.17  
8.05  
8.02  
8.01  
8.00  
7.99  
7.98  
7.95  
7.65  
7.64  
7.63  
7.63  
7.62  
7.61  
7.61  
7.59  
7.58  
7.37  
7.36  
7.35  
7.35  
7.29

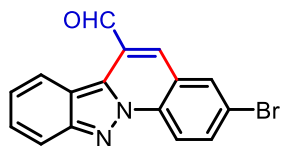

5ea,  $^1\text{H}$  NMR  
400 MHz,  $\text{CDCl}_3$

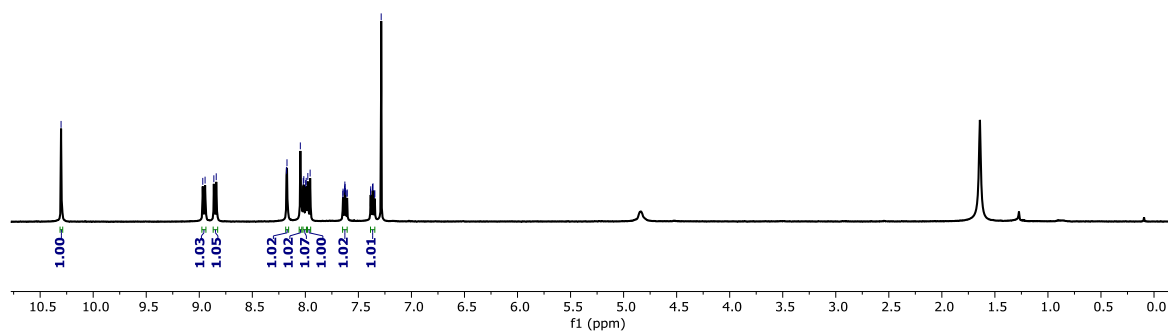

189.4

149.9  
135.6  
134.4  
132.4  
131.7  
129.3  
128.8  
128.3  
124.4  
124.1  
122.2  
120.3  
119.6  
117.2  
116.6

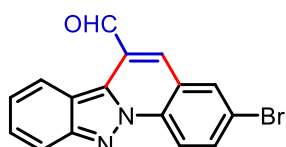

5ea,  $^{13}\text{C}\{^1\text{H}\}$  NMR  
100 MHz,  $\text{CDCl}_3$

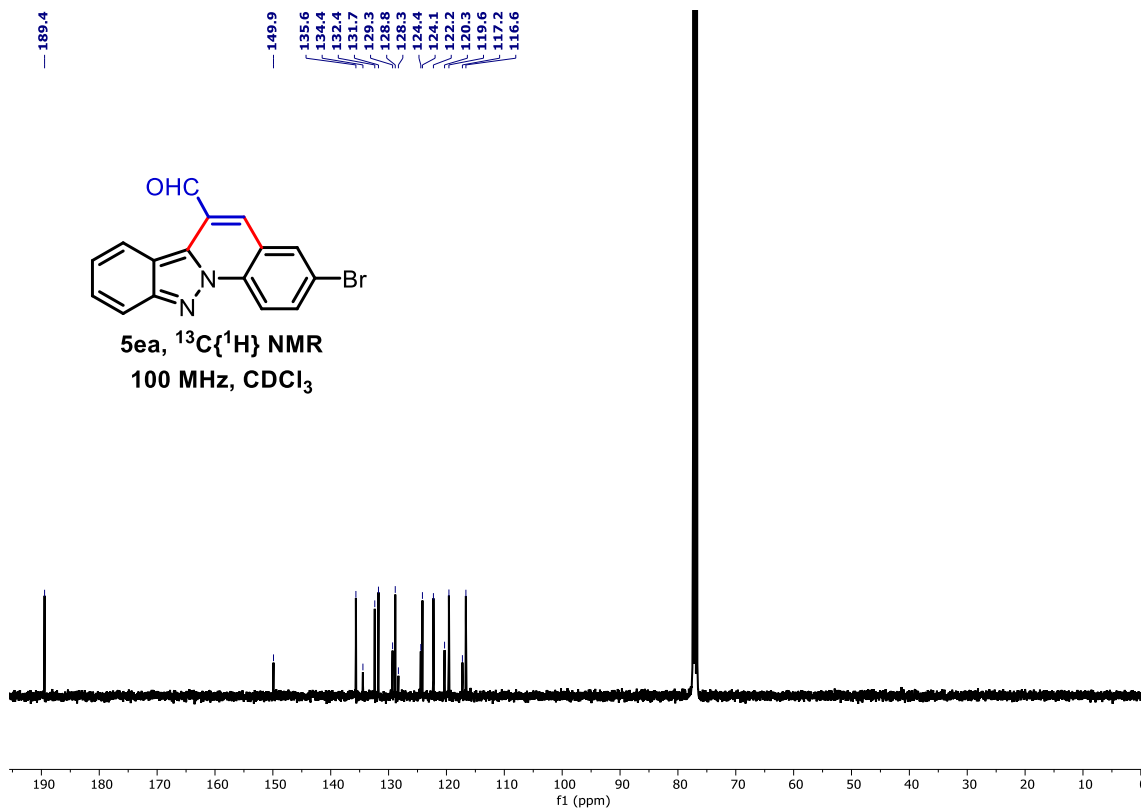

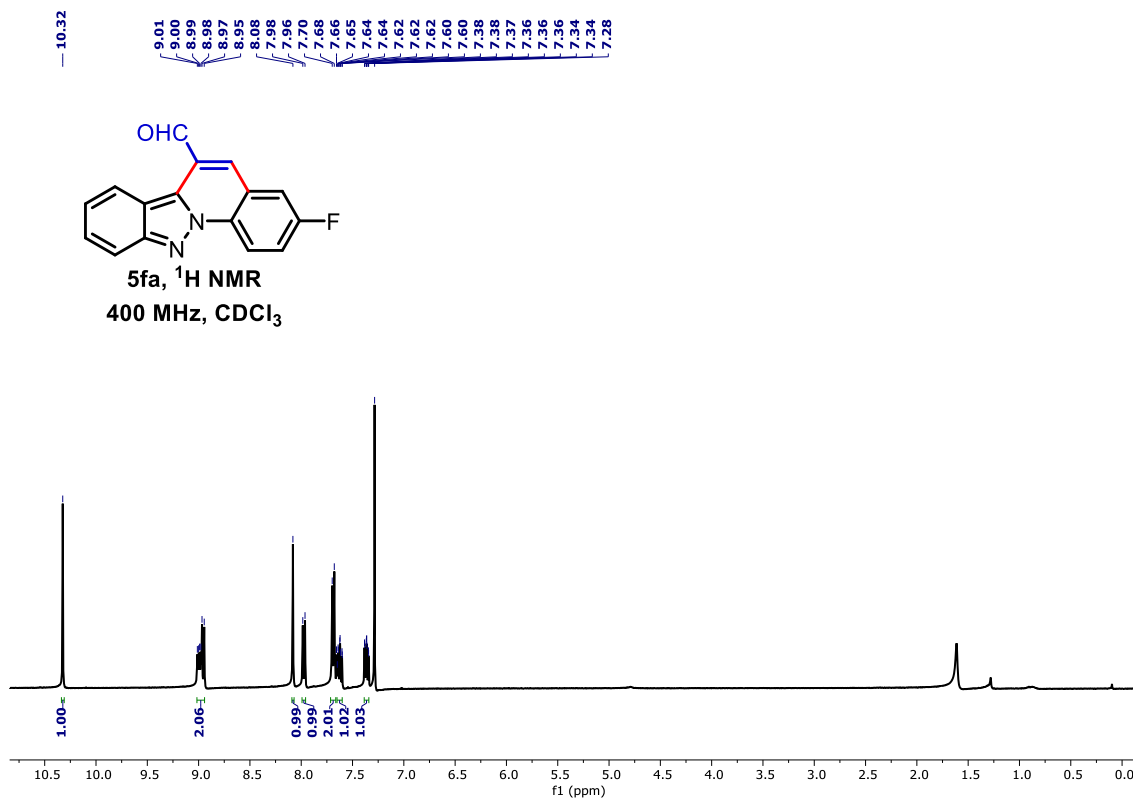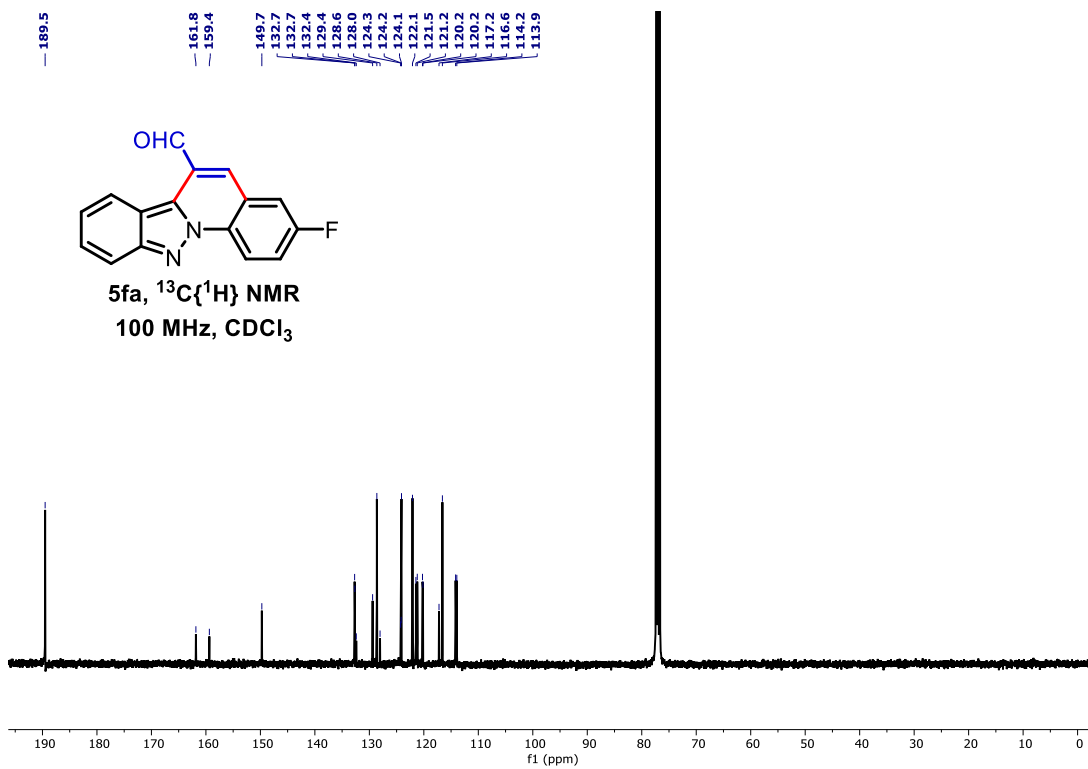

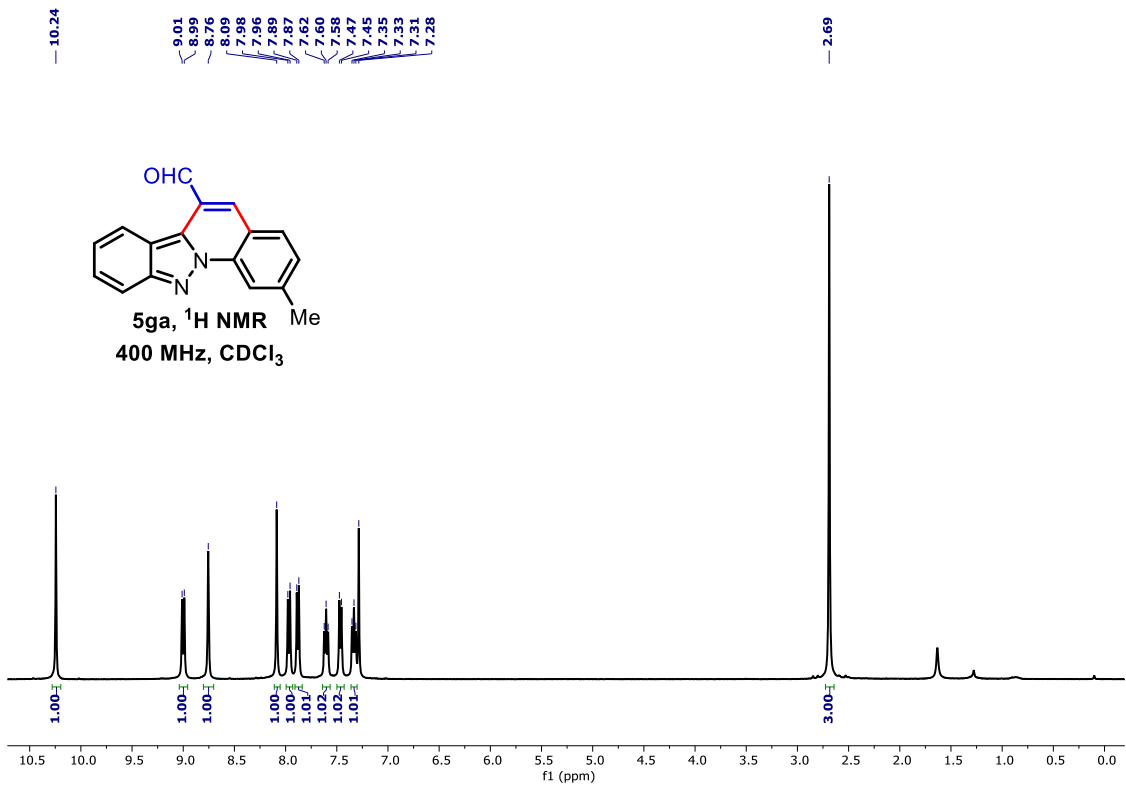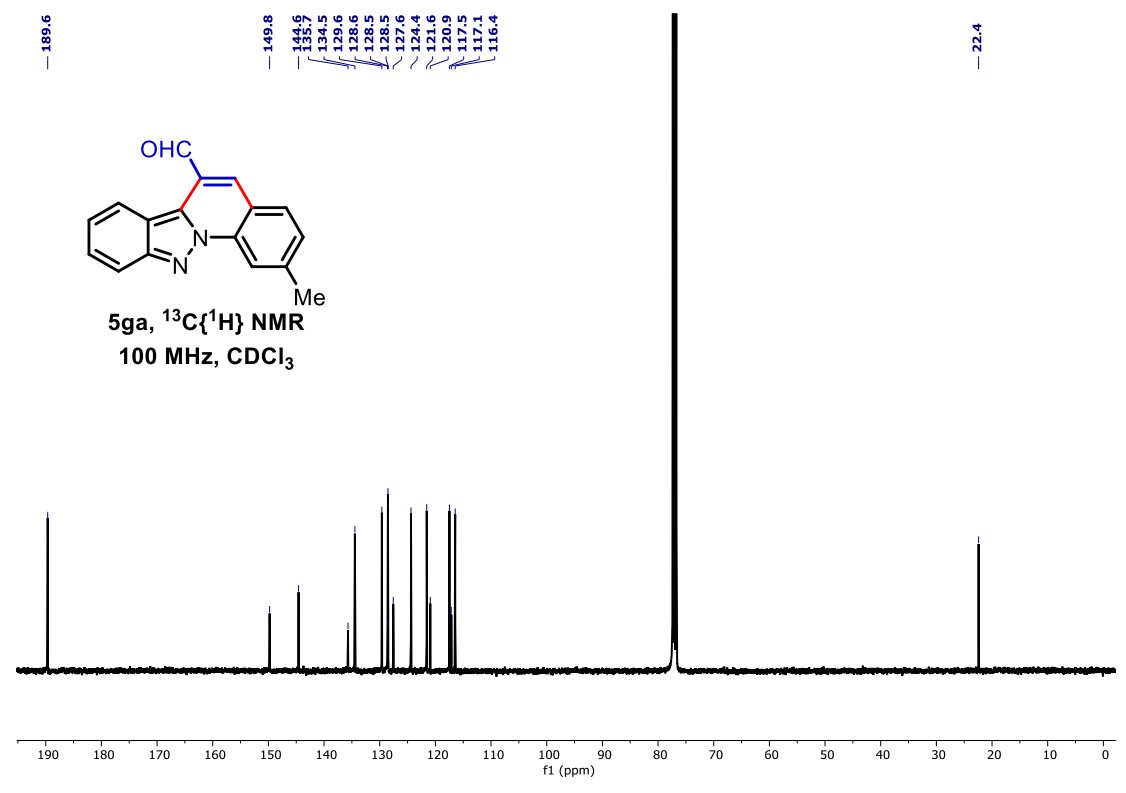

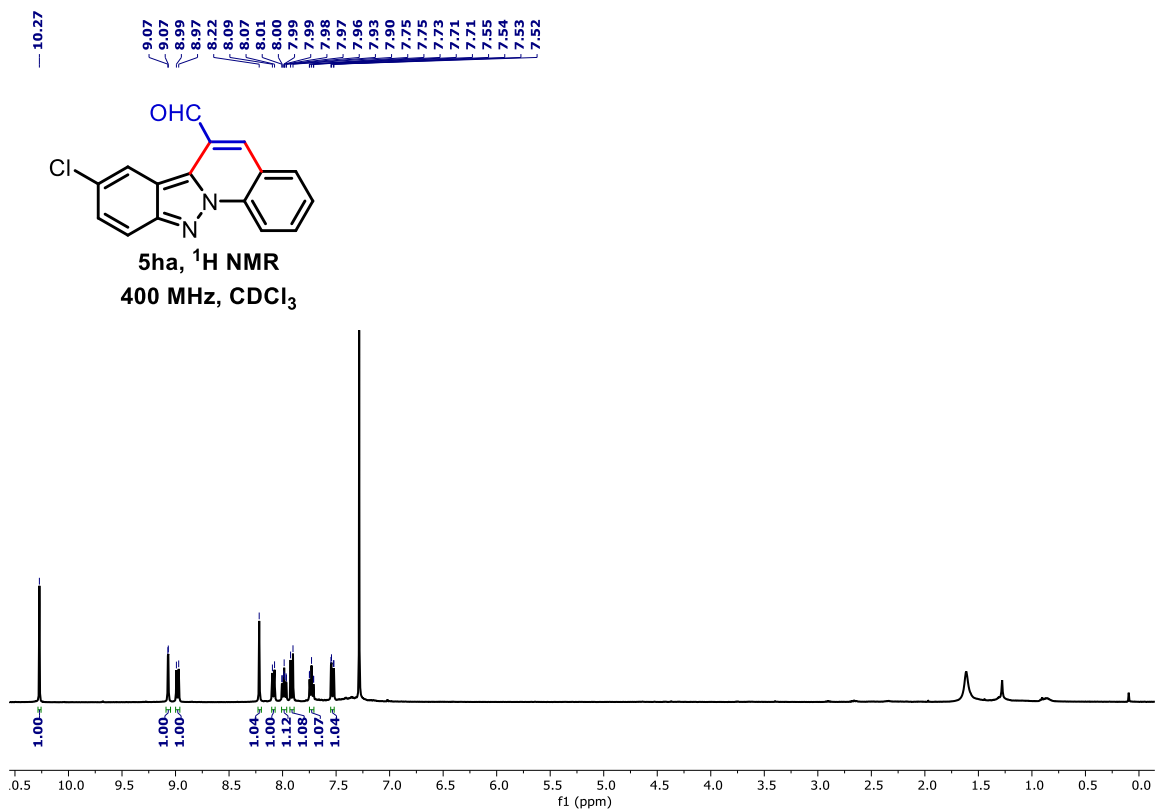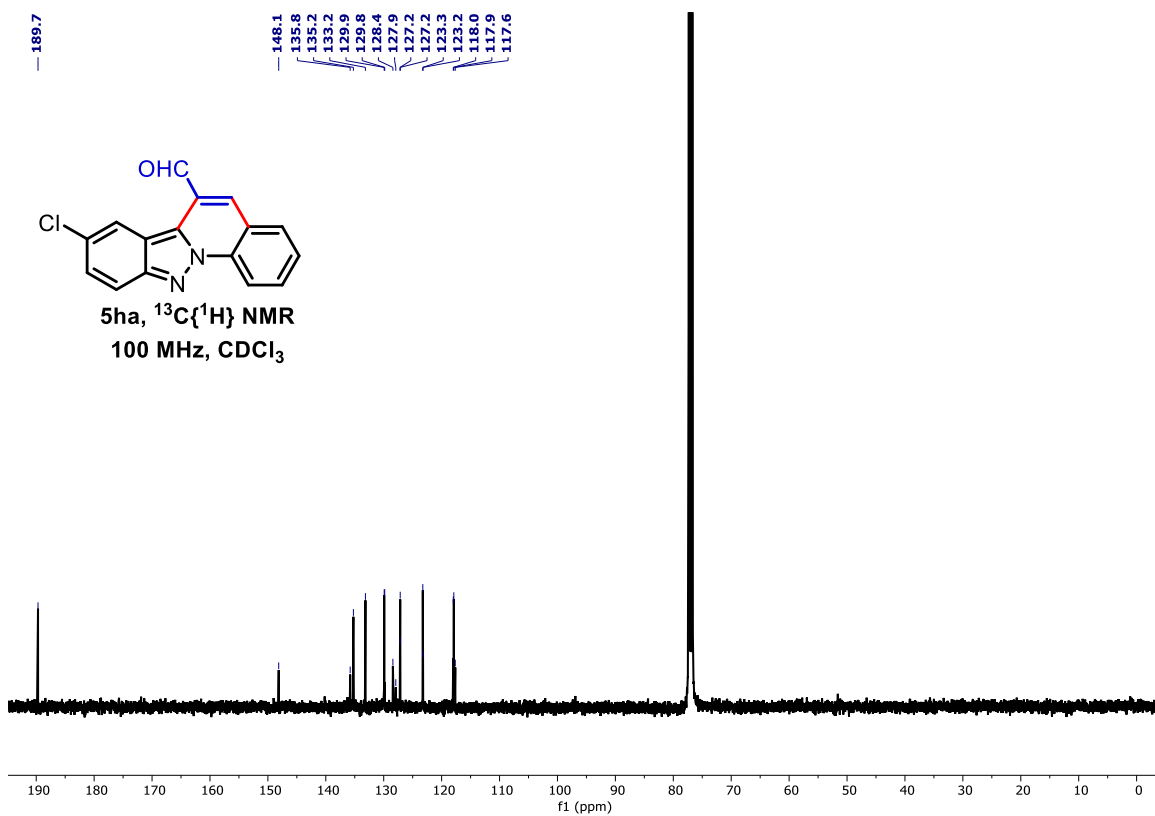

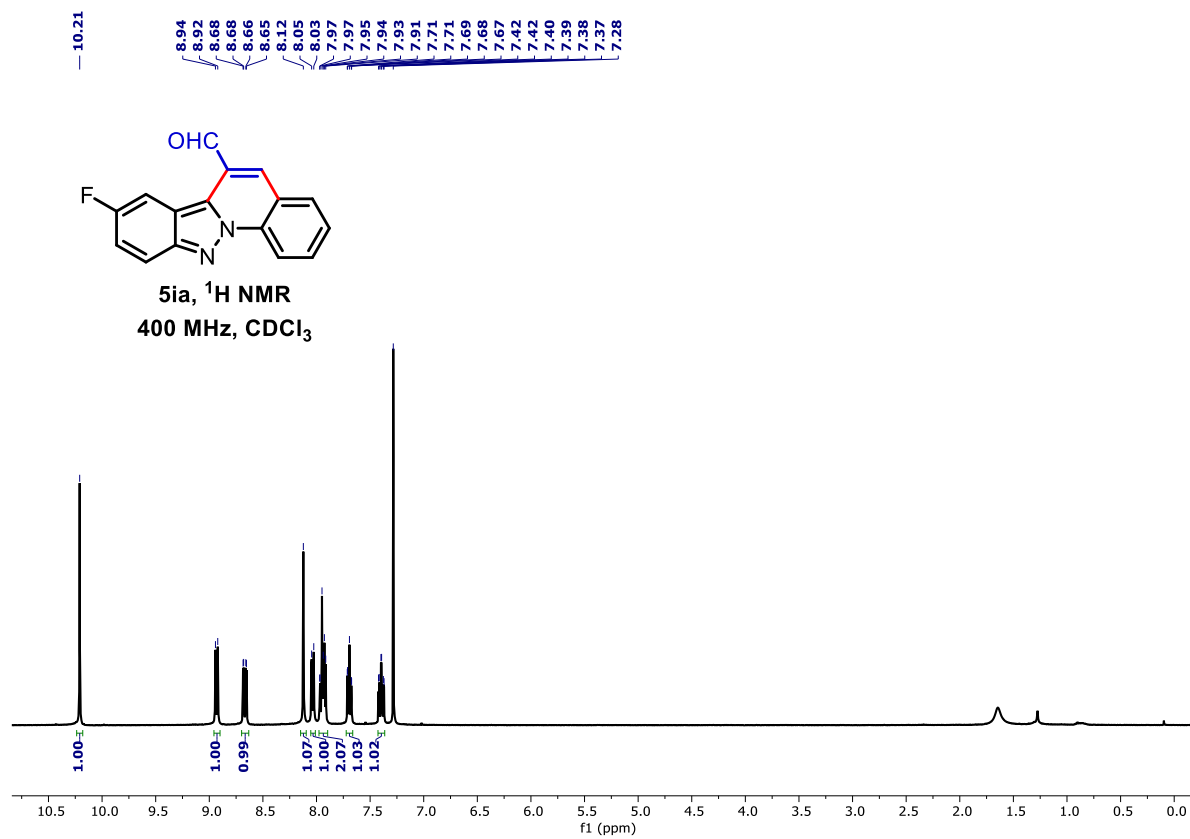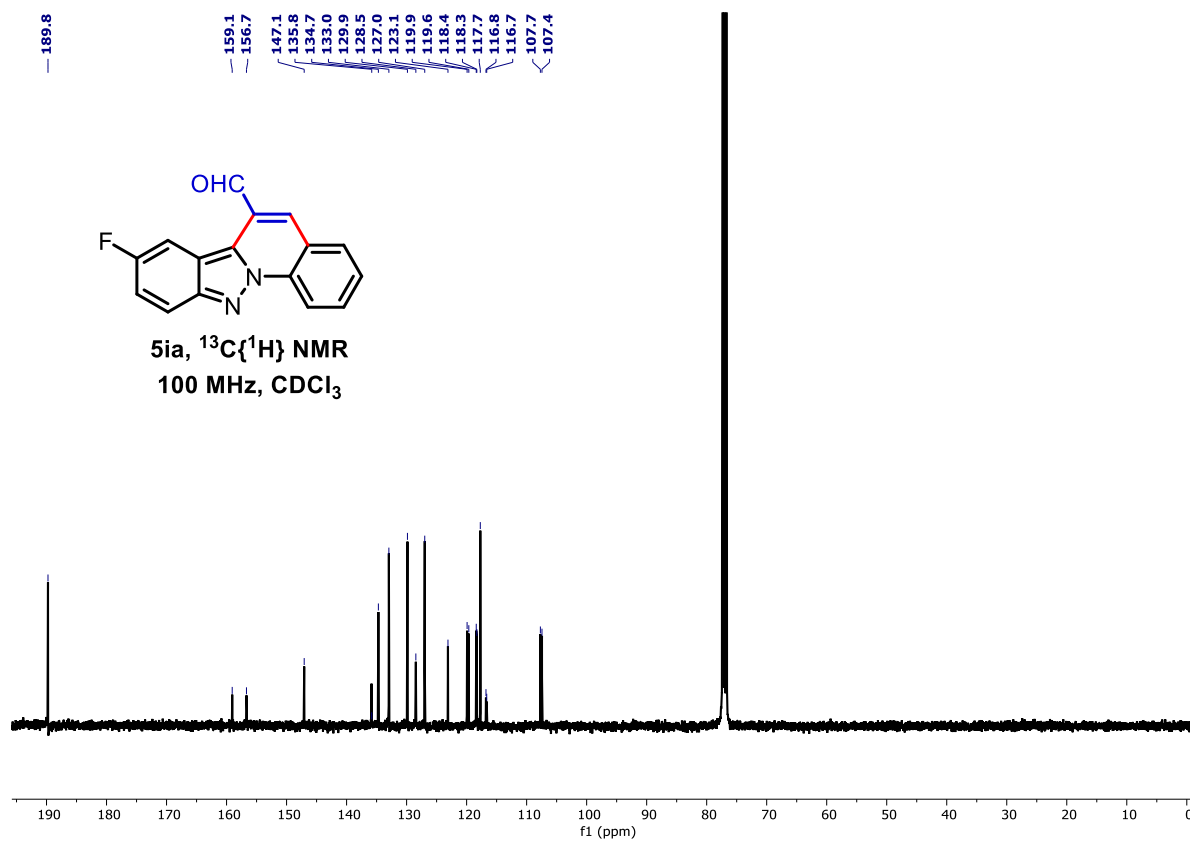



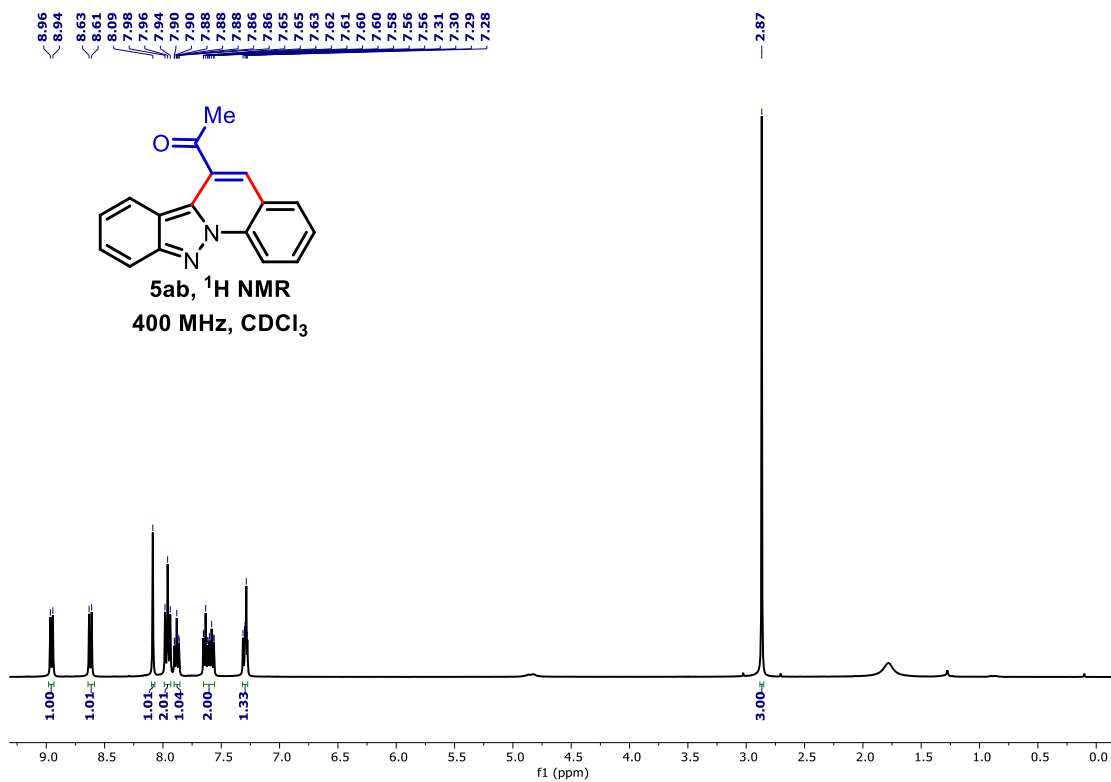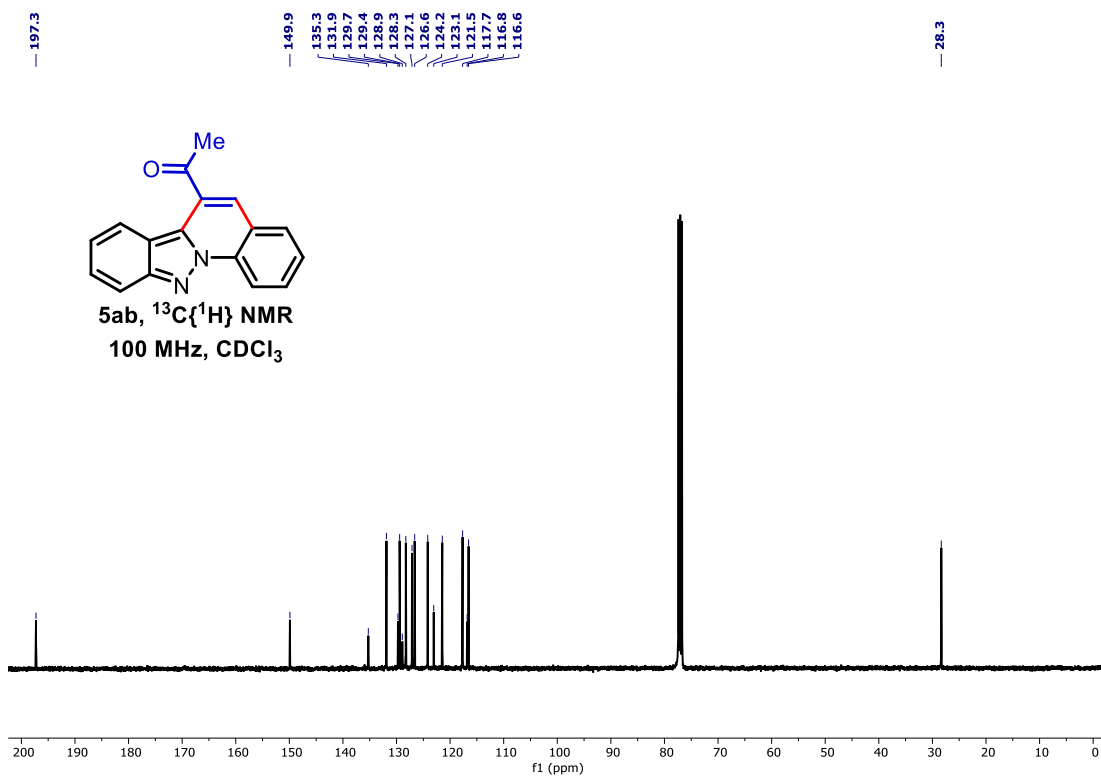

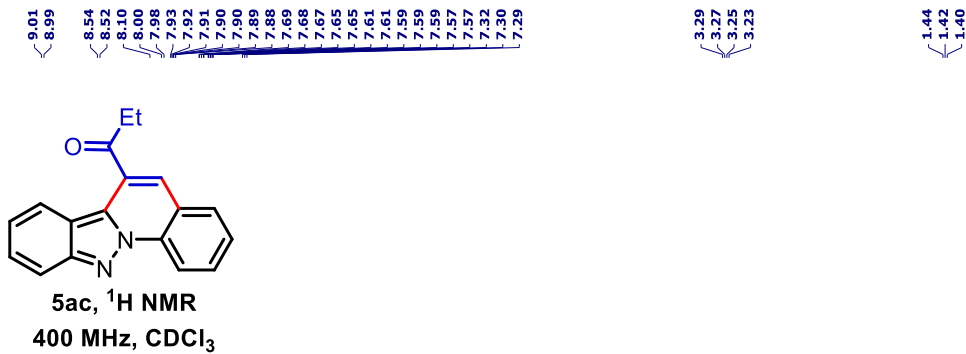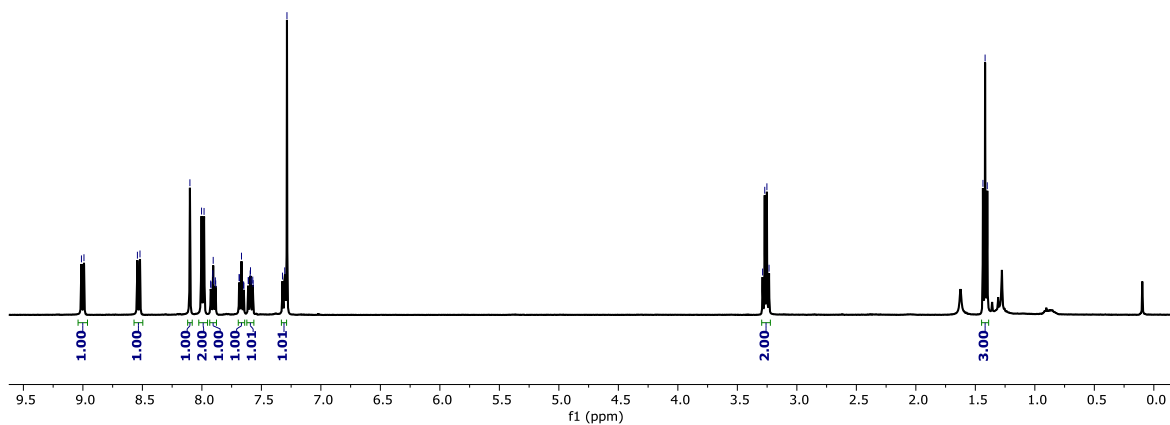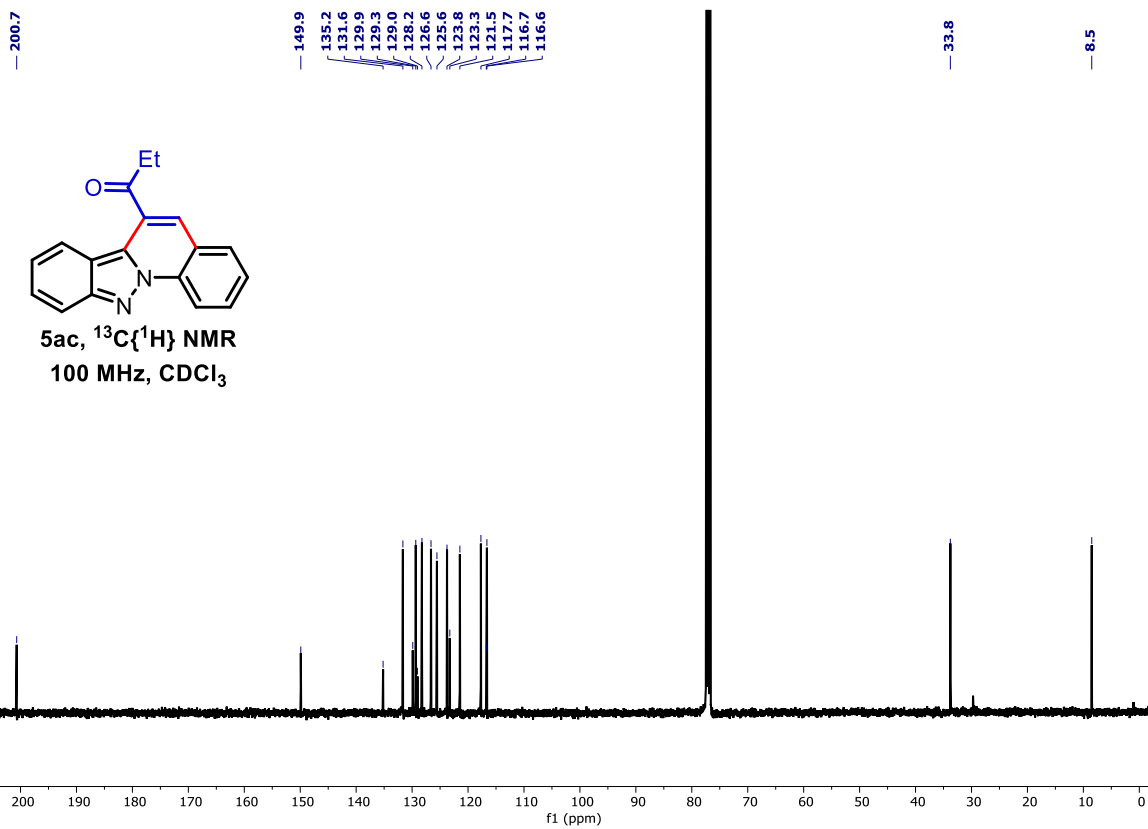

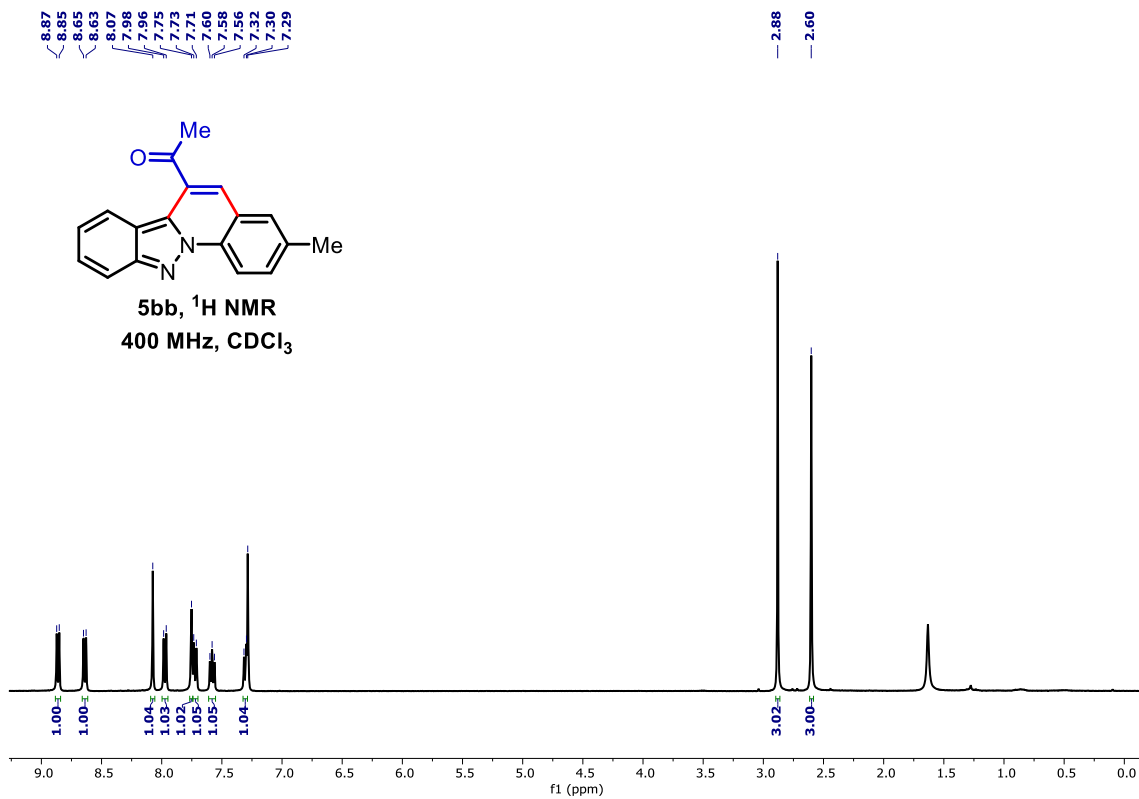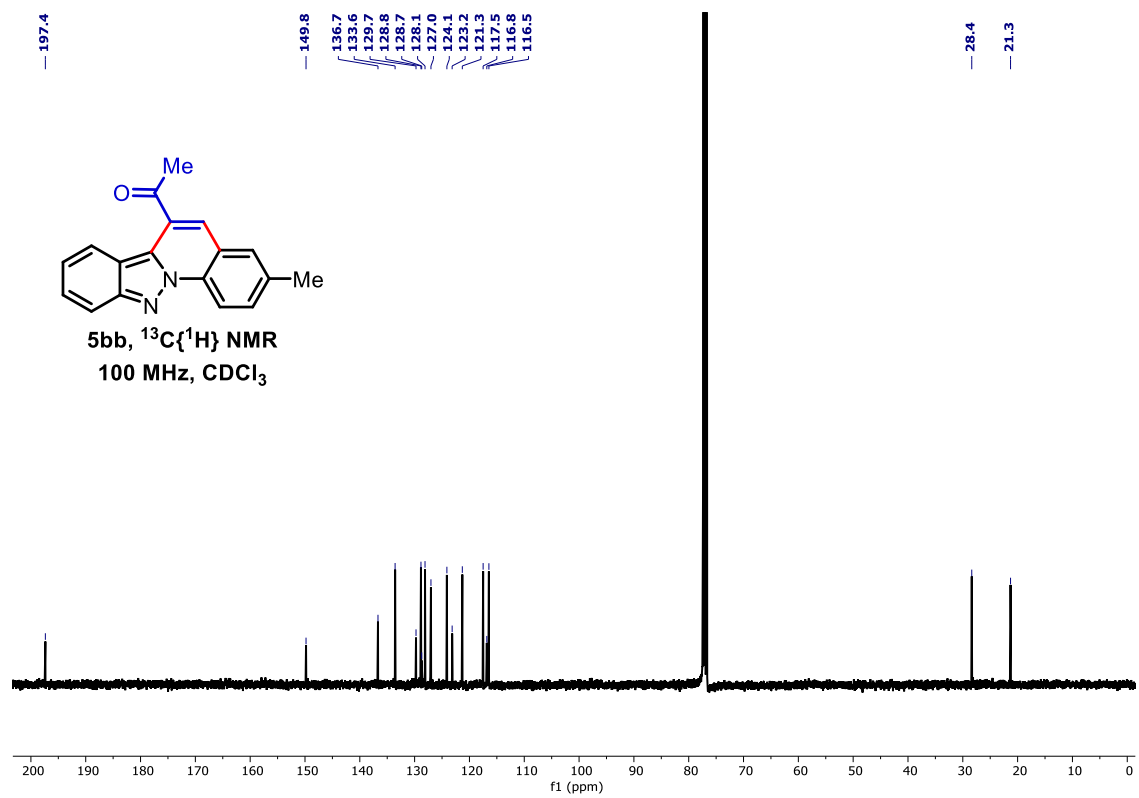

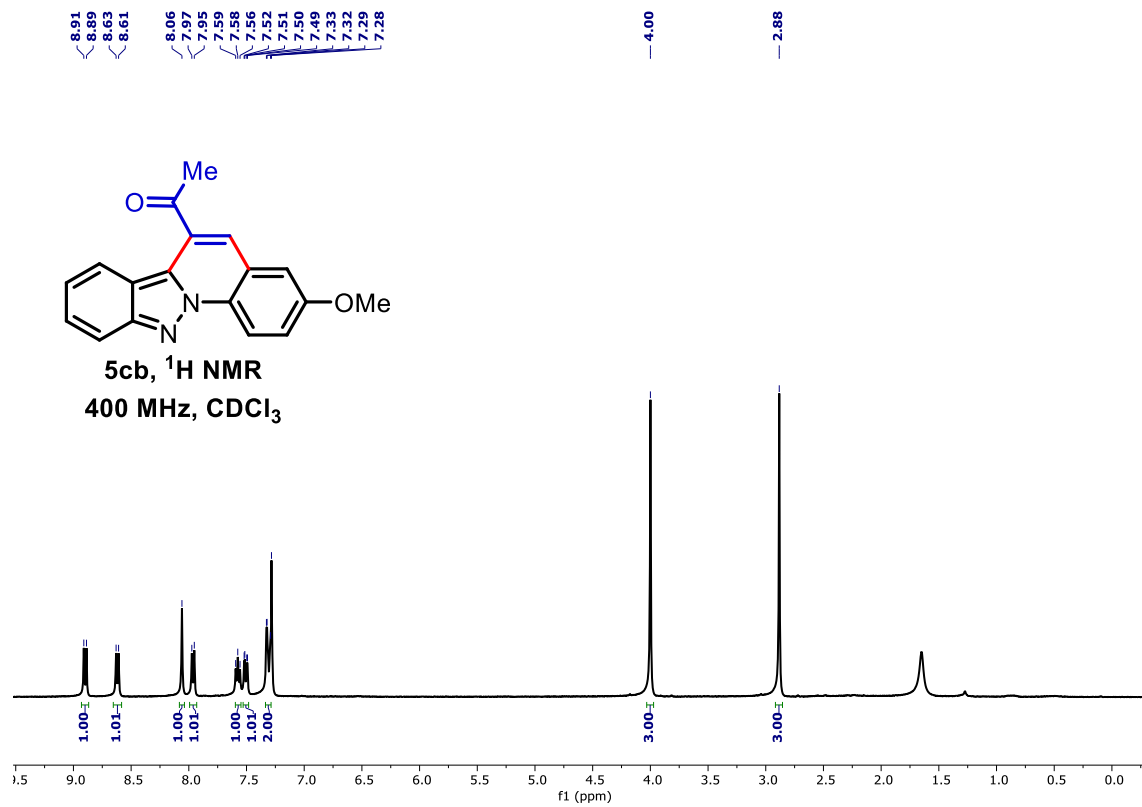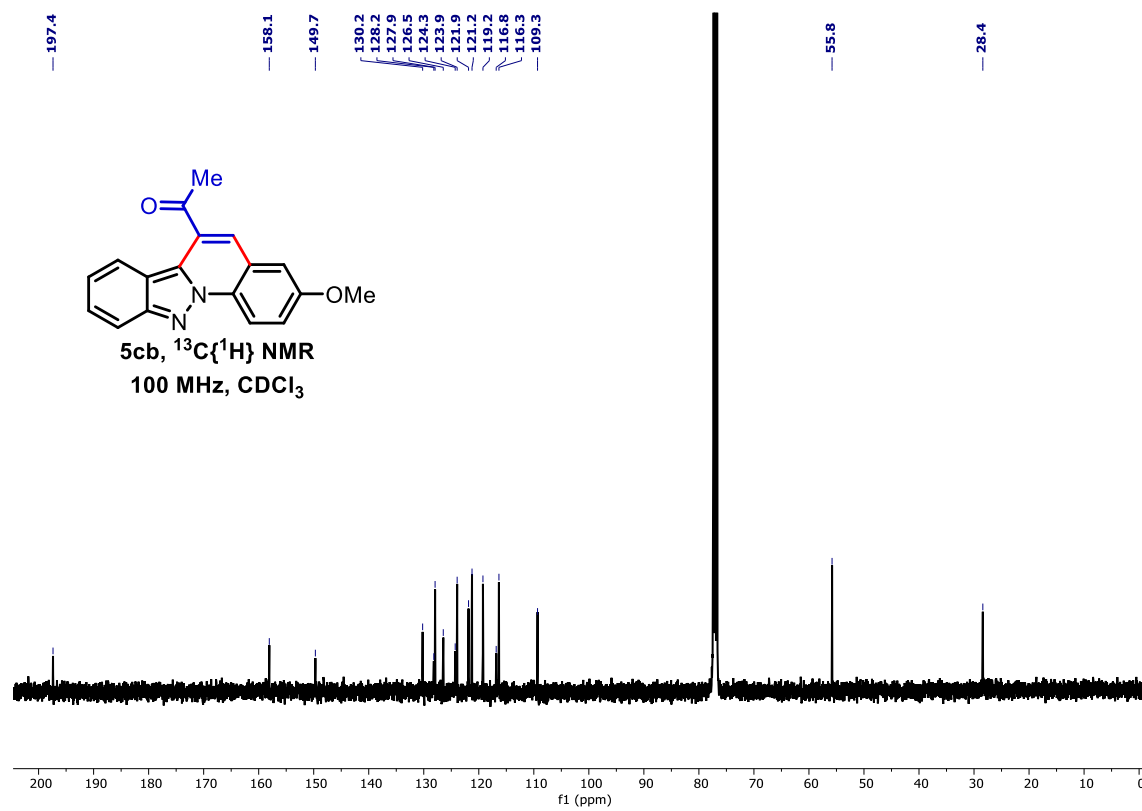

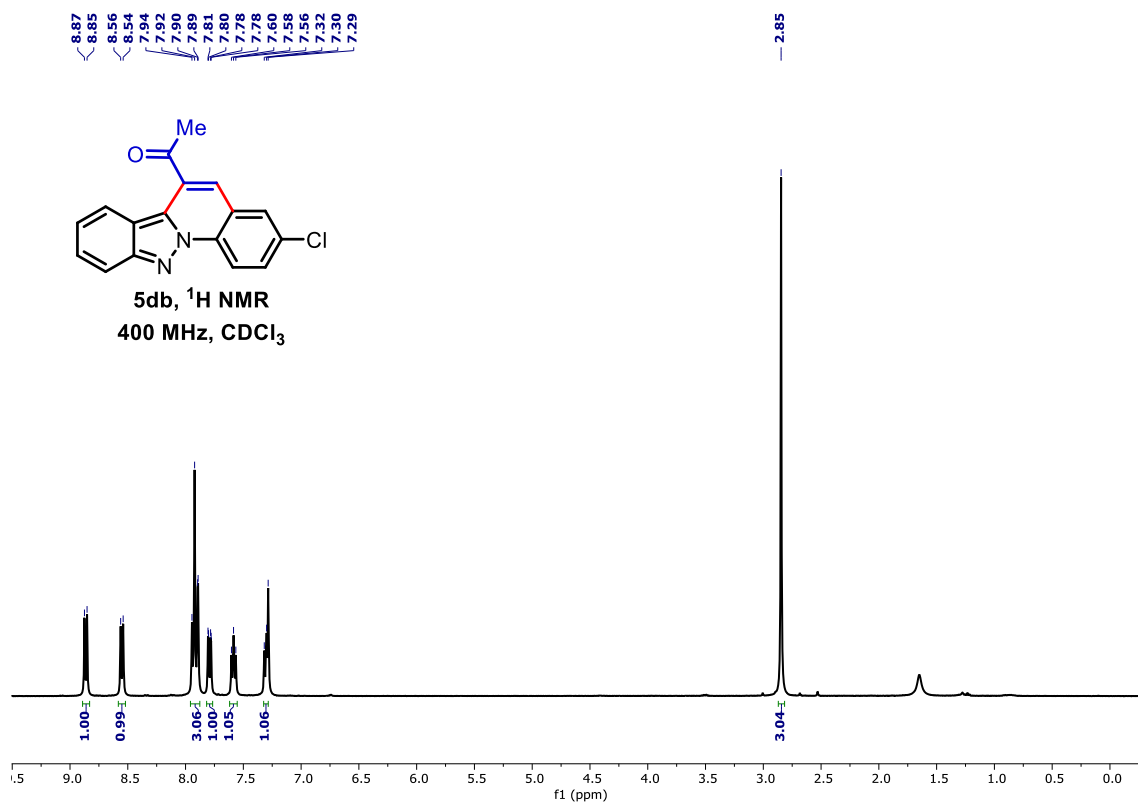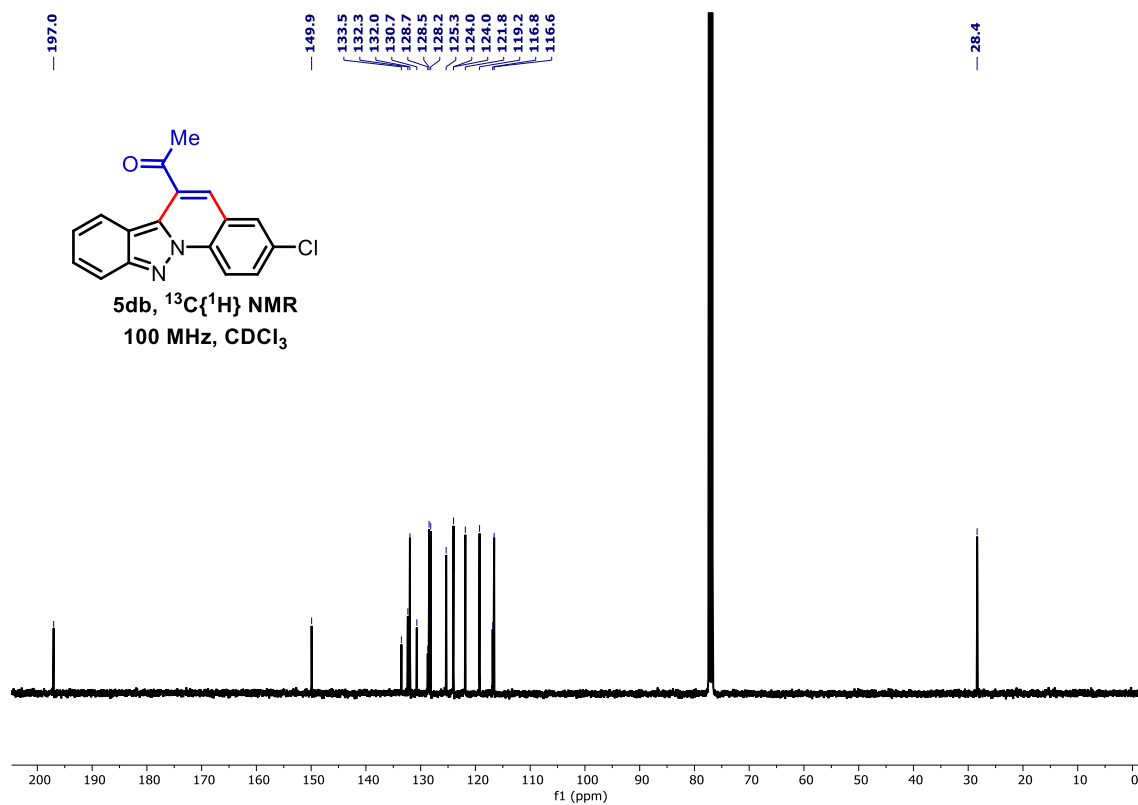

8.87  
8.85  
8.59  
8.57  
8.14  
8.00  
7.97  
7.95  
7.62  
7.60  
7.58  
7.34  
7.32  
7.30  
7.28

2.88

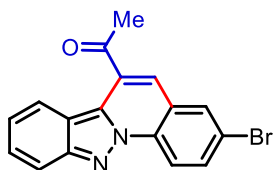

5b,  $^1\text{H}$  NMR  
400 MHz,  $\text{CDCl}_3$

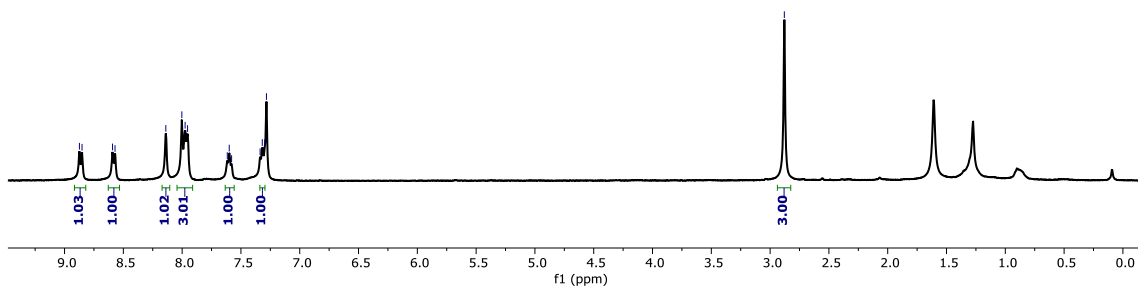

197.1

150.0  
134.7  
134.0  
131.4  
130.8  
128.8  
128.5  
125.2  
124.5  
124.0  
121.9  
120.1  
119.5  
116.9  
116.6

28.4

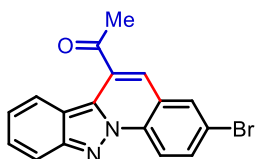

5b,  $^{13}\text{C}\{^1\text{H}\}$  NMR  
100 MHz,  $\text{CDCl}_3$

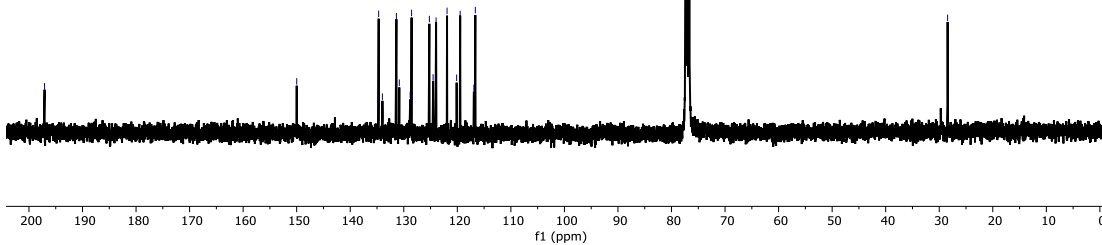

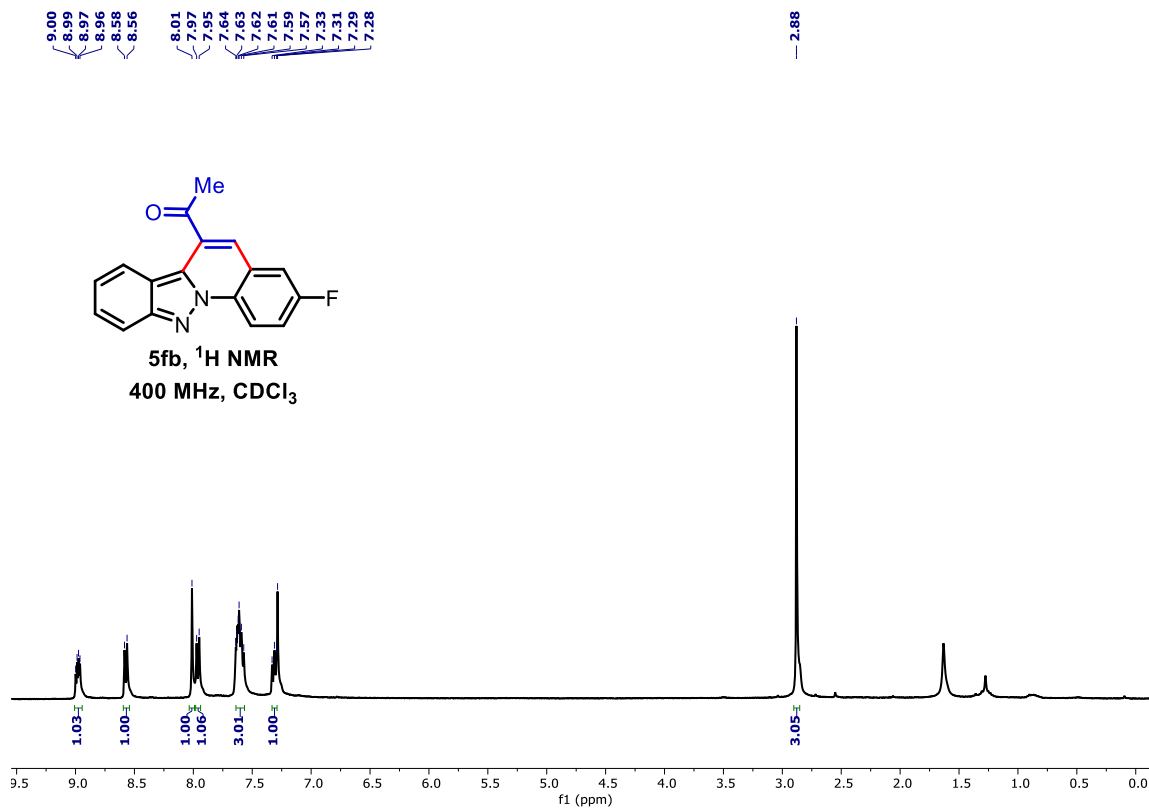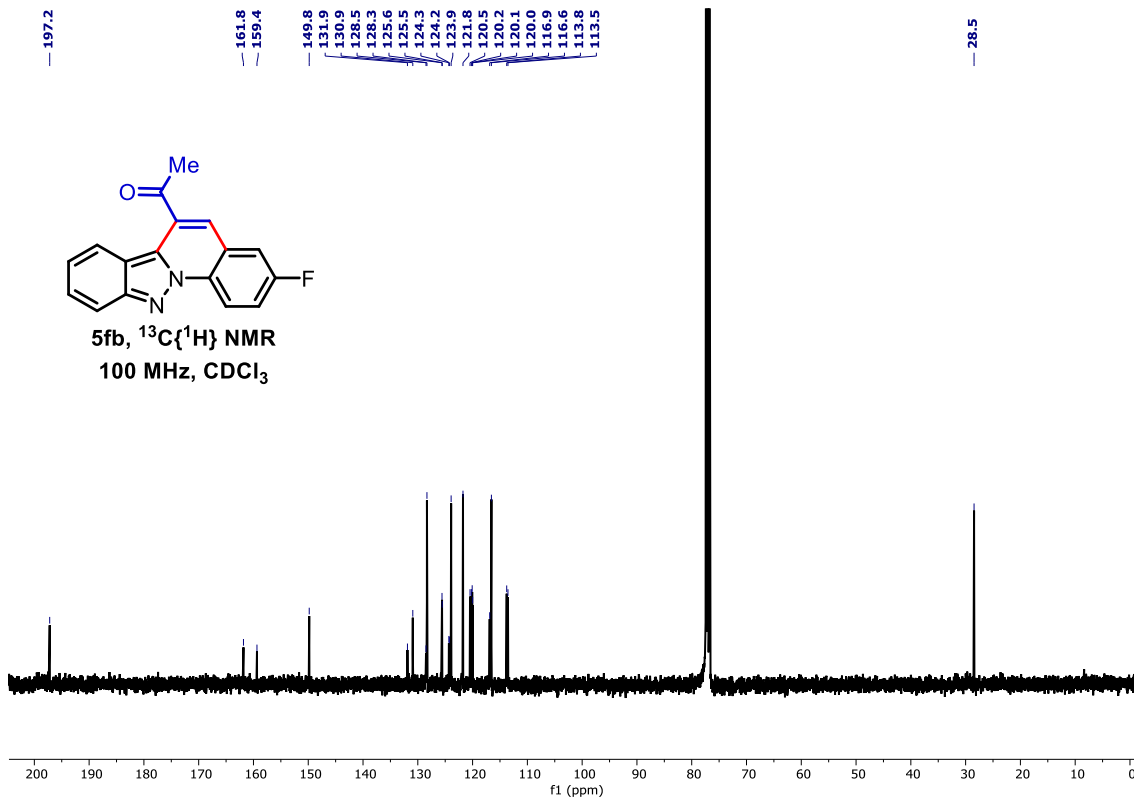

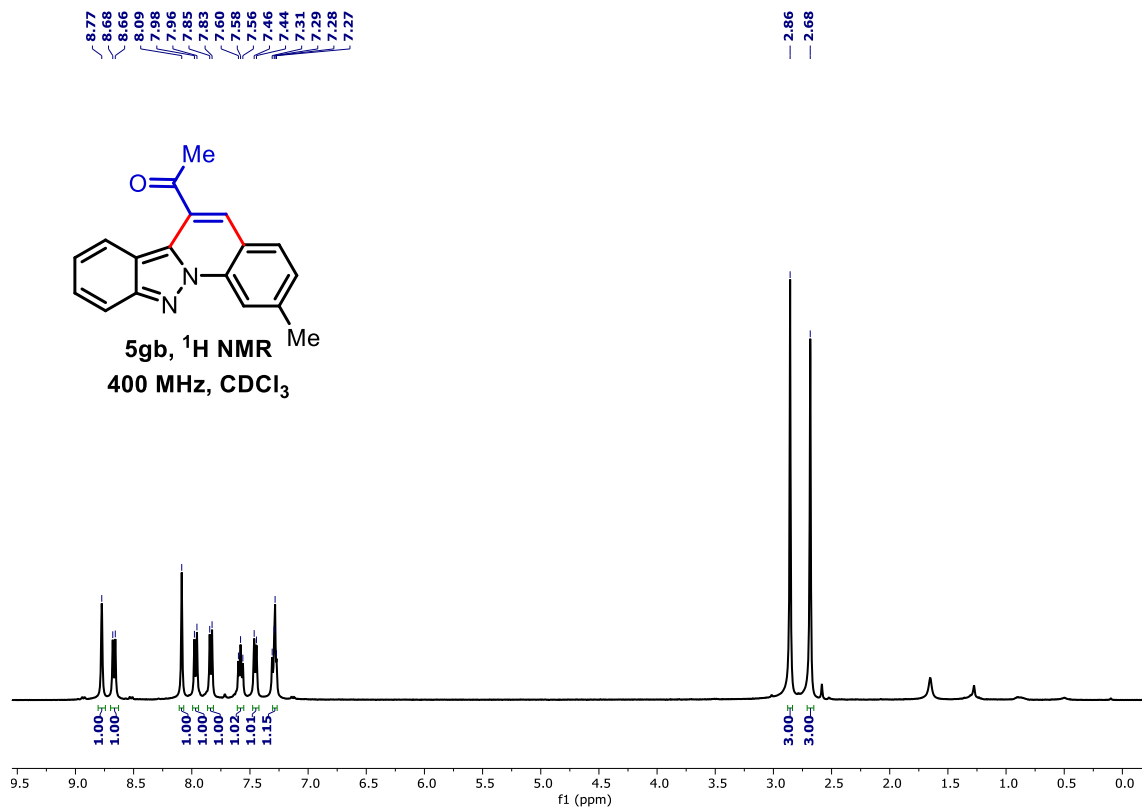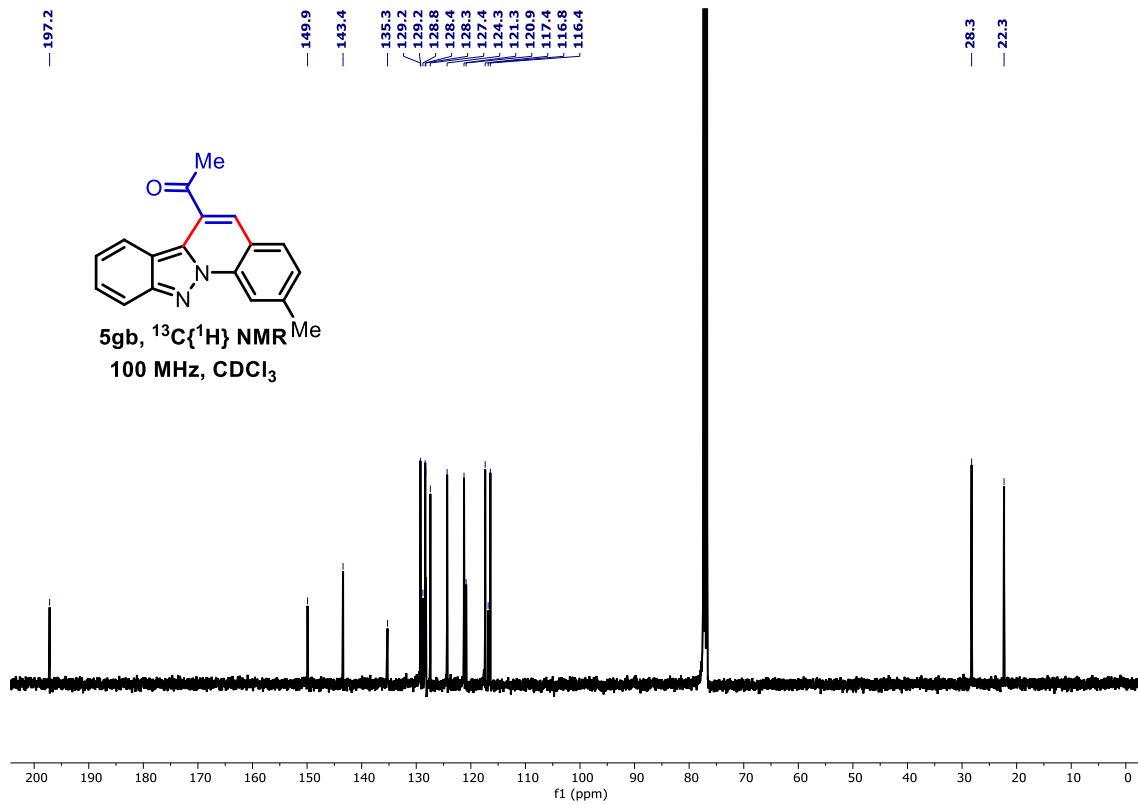



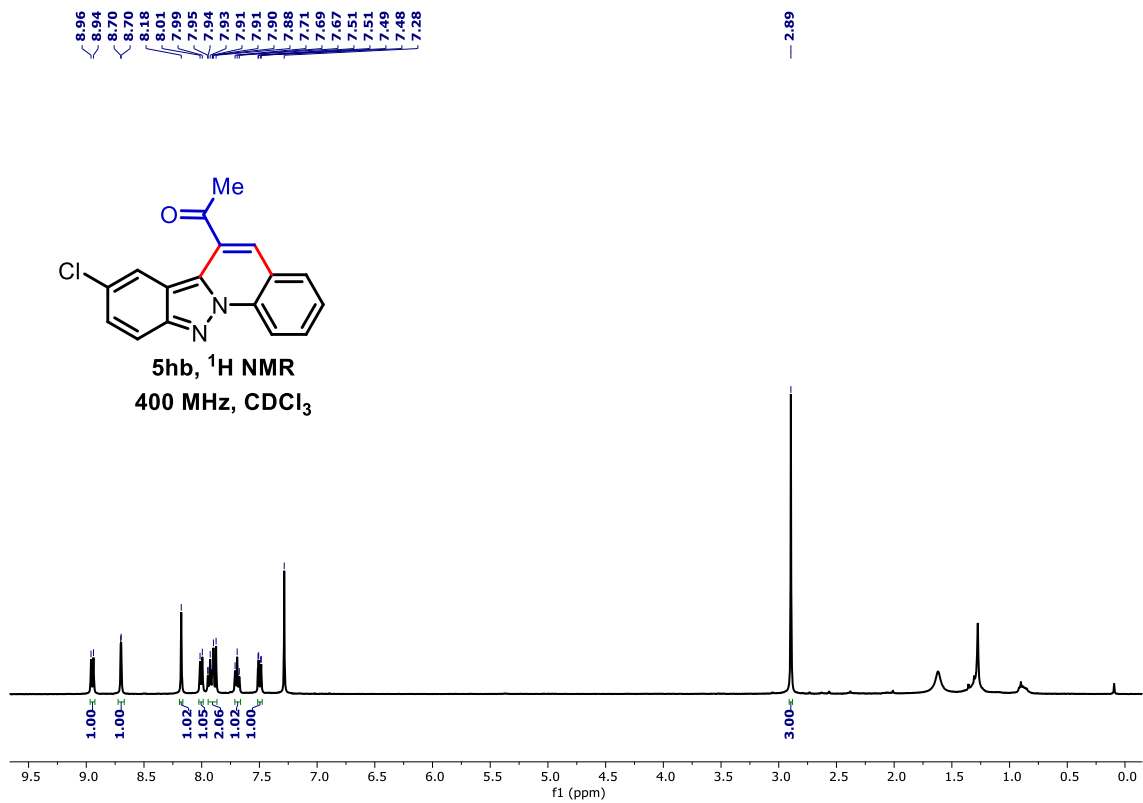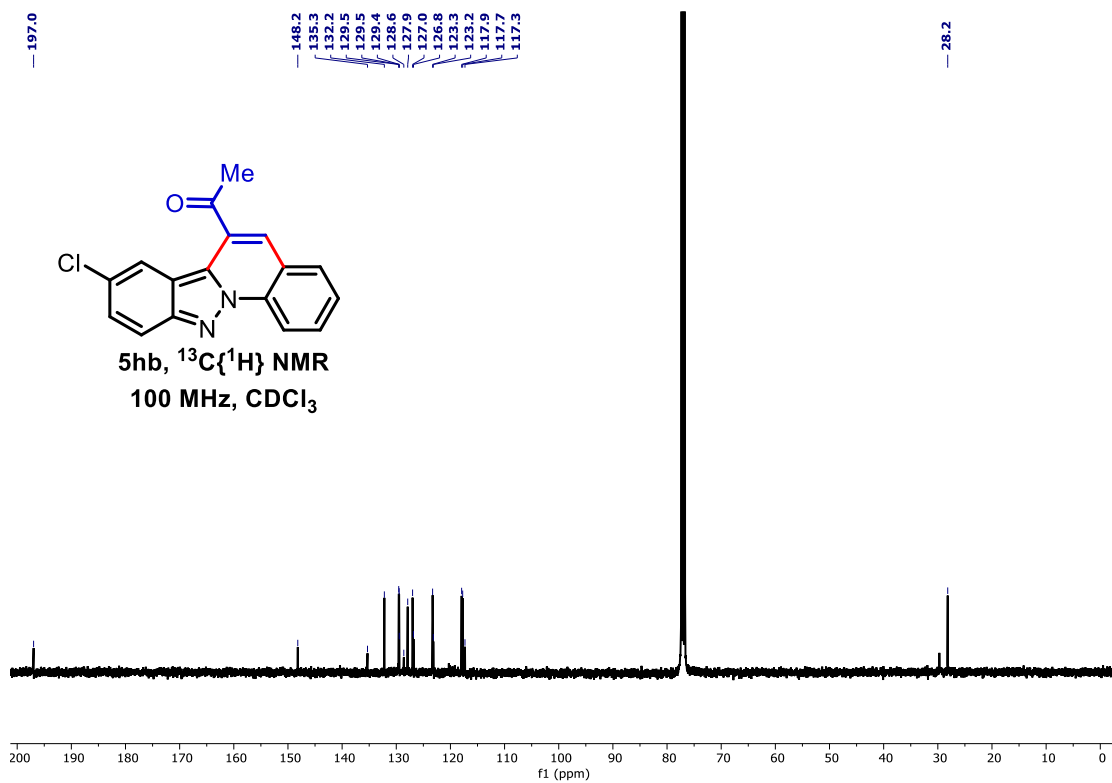

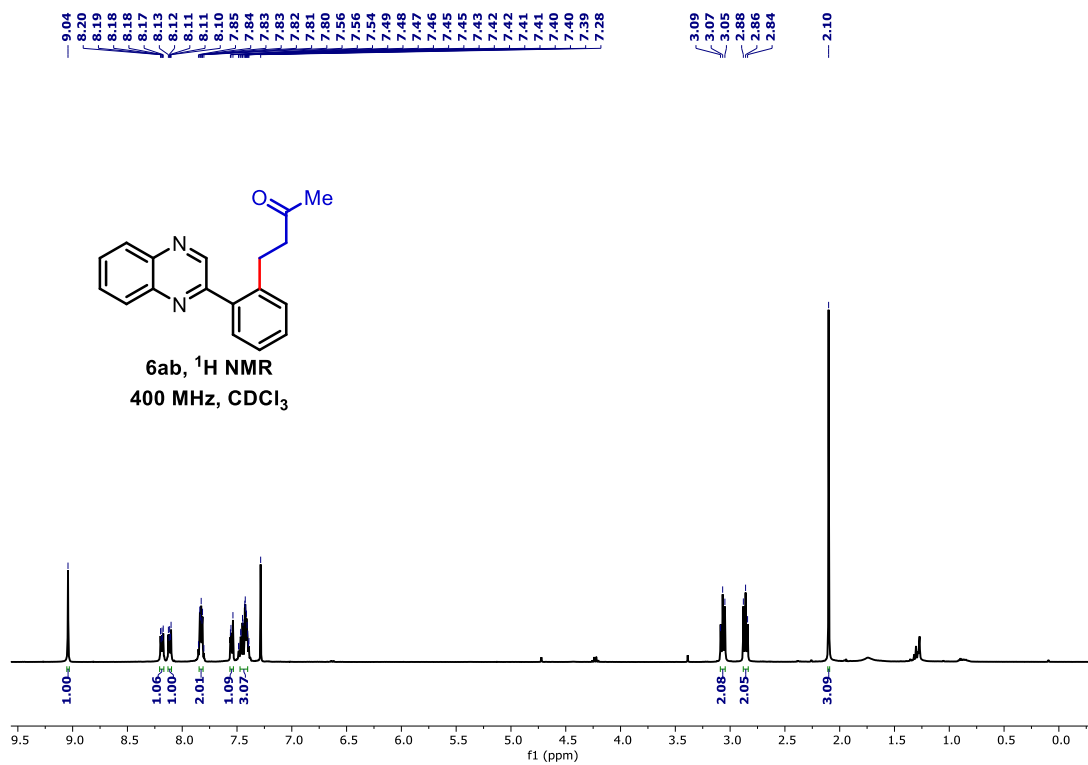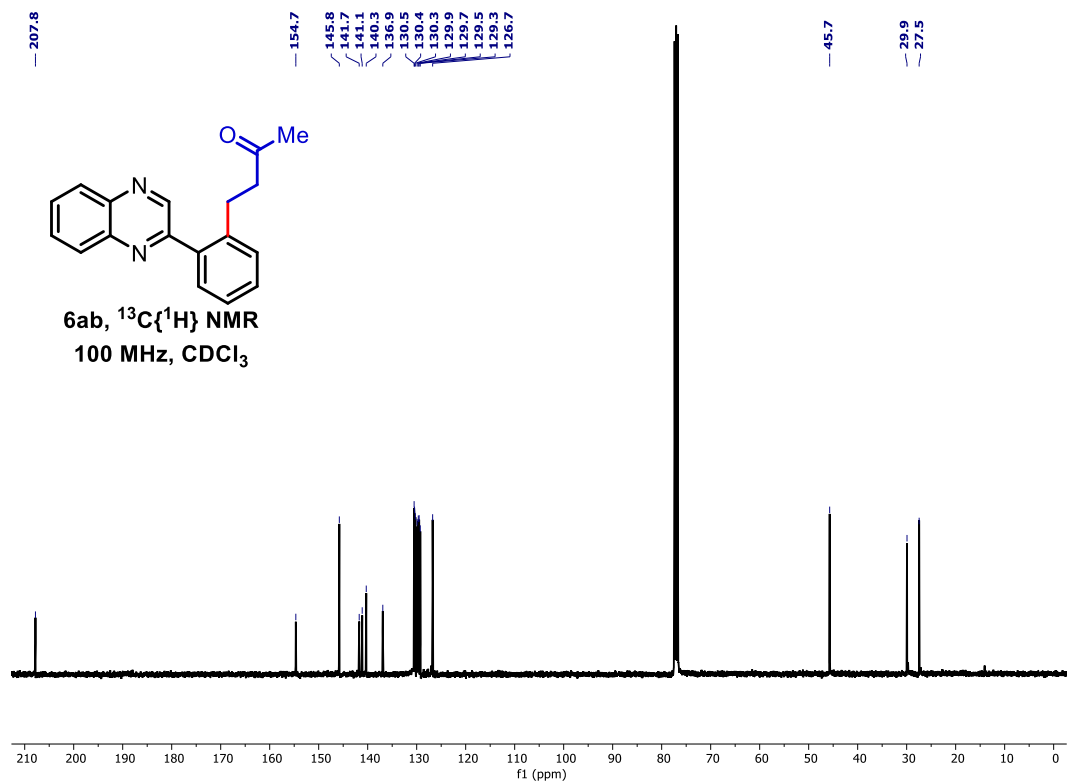

8.16  
8.16  
7.81  
7.80  
7.80  
7.78  
7.78  
7.76  
7.76  
7.75  
7.48  
7.47  
7.46  
7.45  
7.44  
7.44  
7.42  
7.41  
7.39  
7.39  
7.37  
7.37  
7.36  
7.35  
7.28  
7.19  
7.19  
7.18  
7.17  
7.16  
7.15

2.86  
2.84  
2.82  
2.64  
2.62  
2.60  
2.33  
2.30  
2.27

0.99  
0.97  
0.95

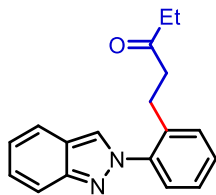

7ac, <sup>1</sup>H NMR  
400 MHz, CDCl<sub>3</sub>

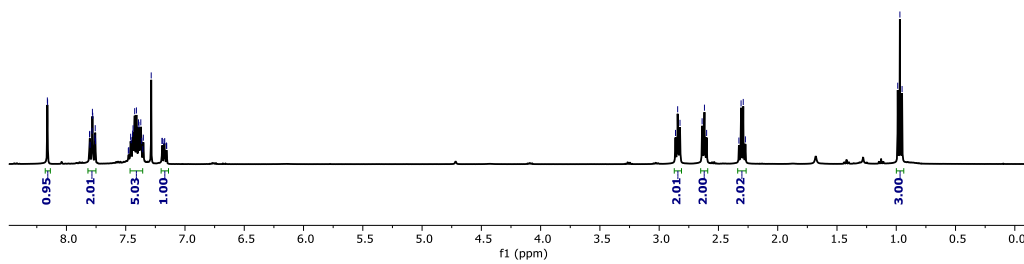

210.4

149.3  
140.1  
137.5  
130.5  
129.5  
127.0  
127.0  
126.5  
124.6  
122.3  
122.0  
120.4  
117.9

43.0  
35.9  
25.7

7.7

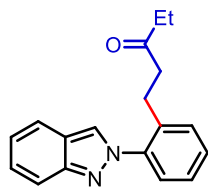

7ac, <sup>13</sup>C{<sup>1</sup>H} NMR  
100 MHz, CDCl<sub>3</sub>

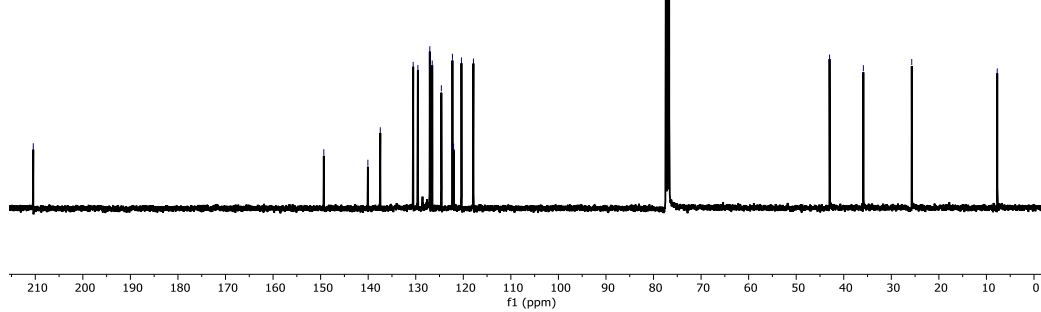

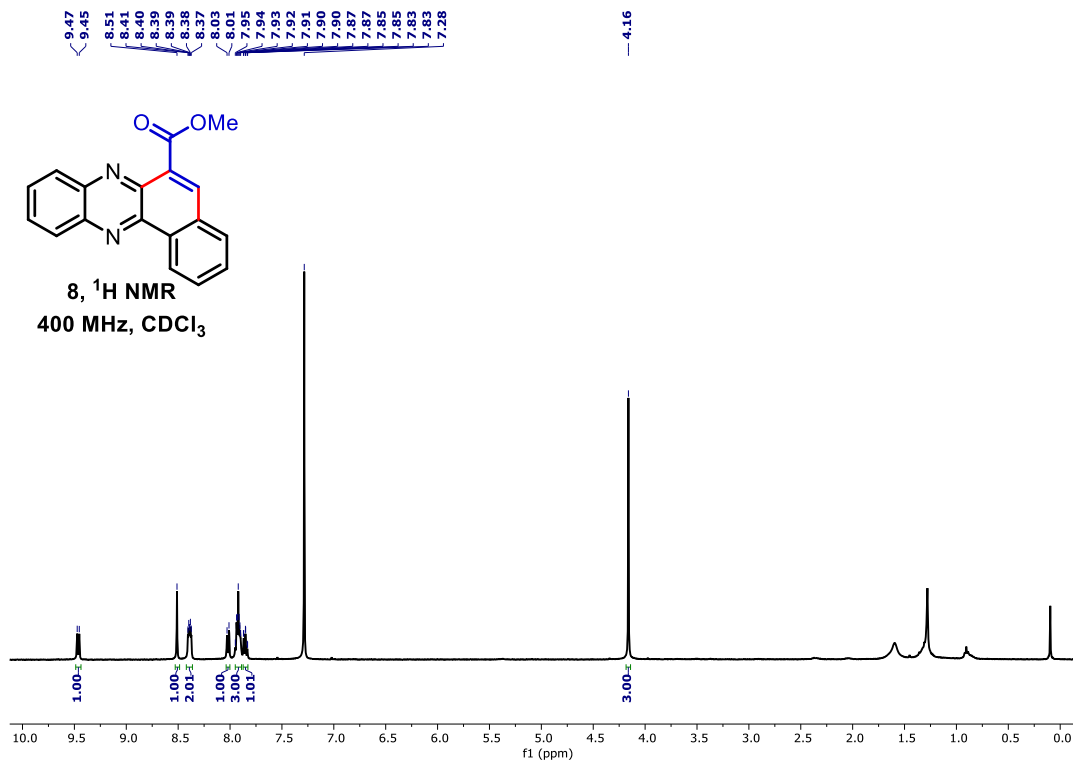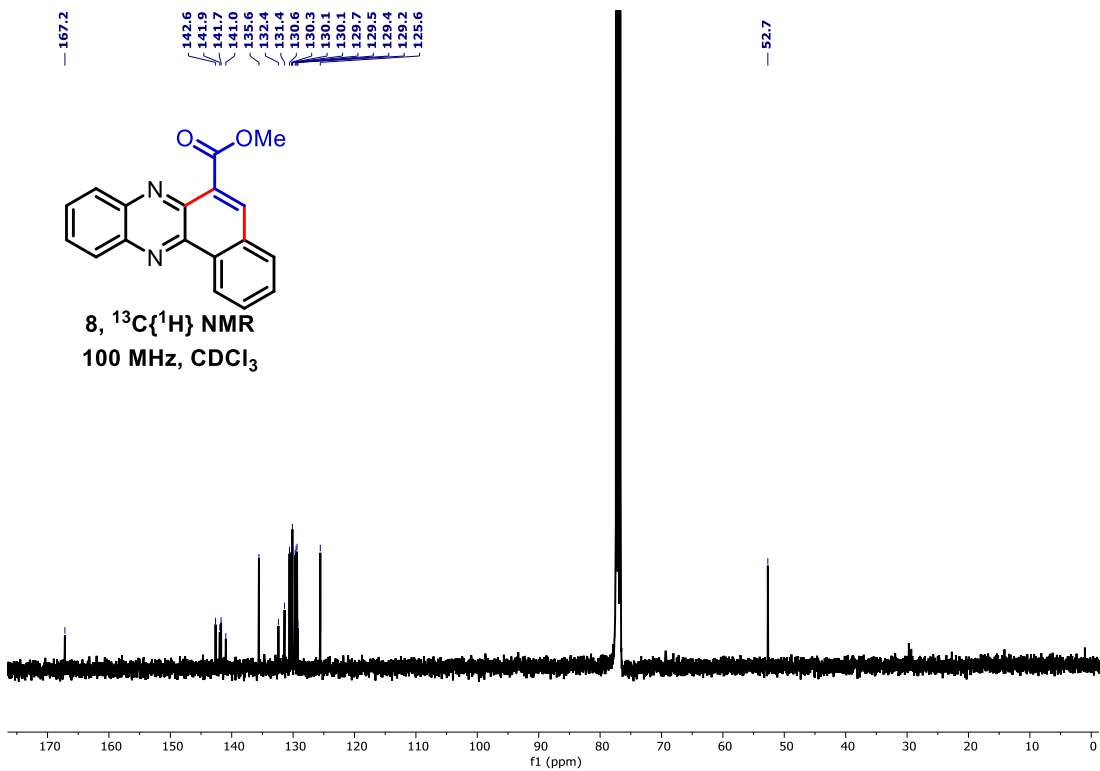

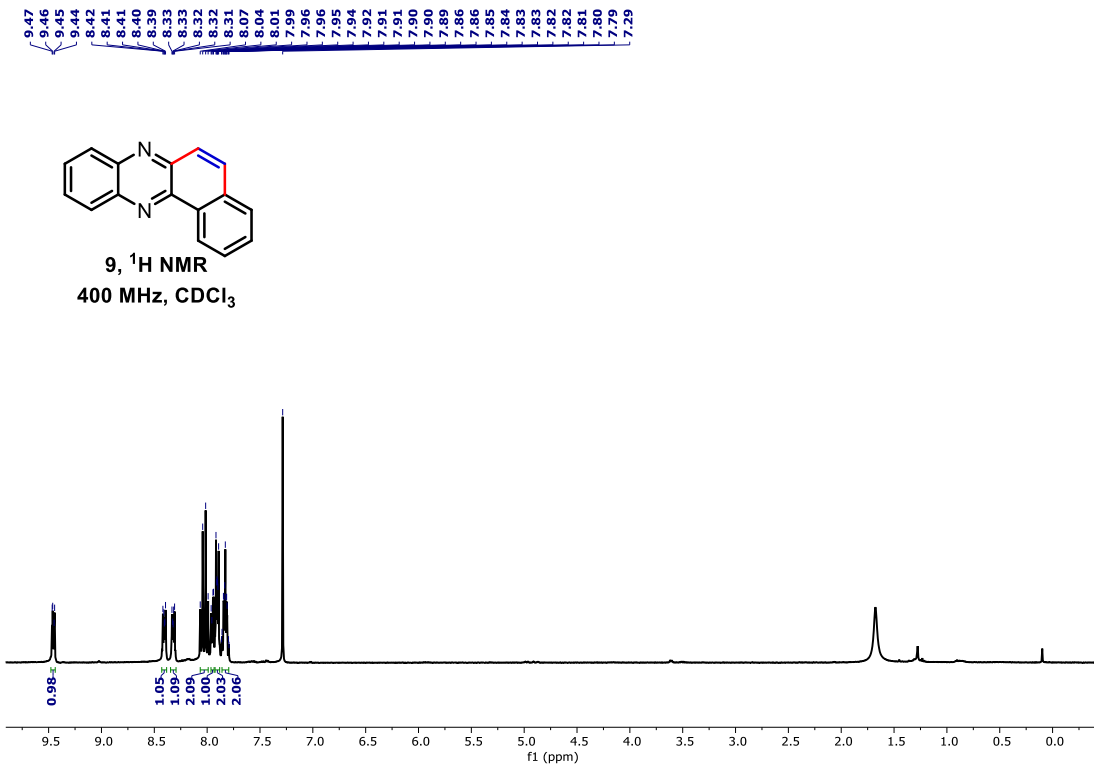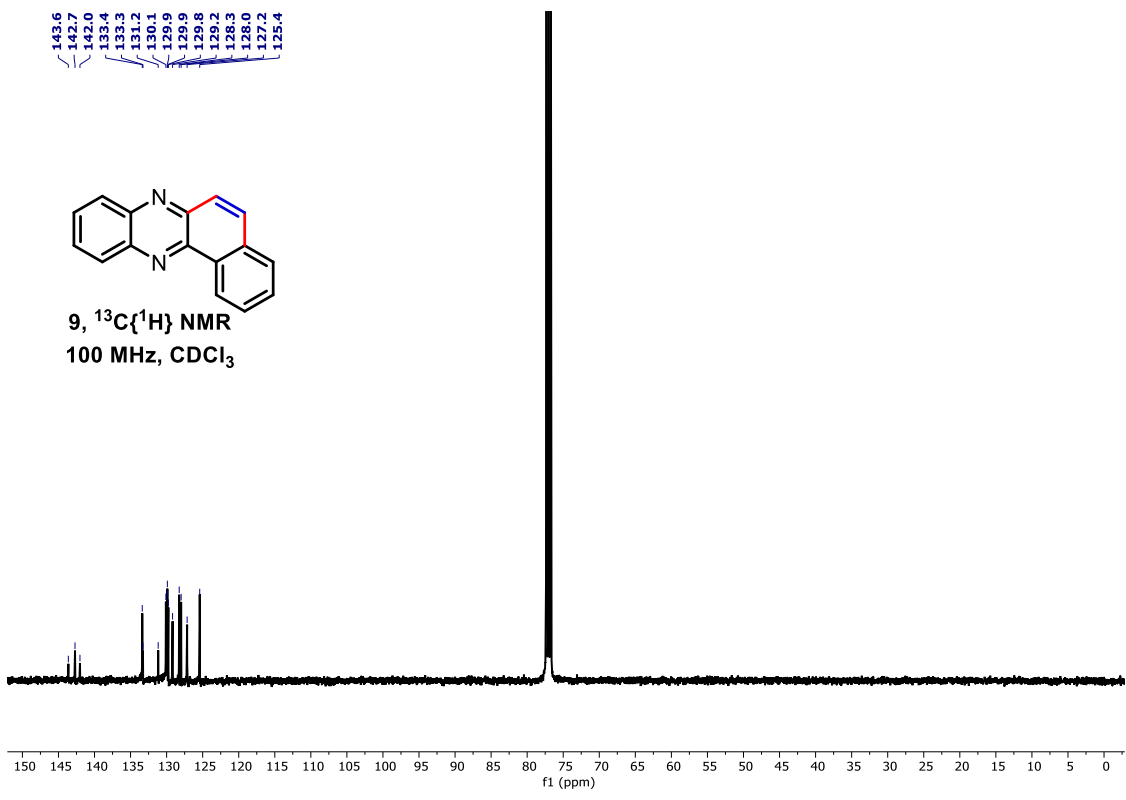

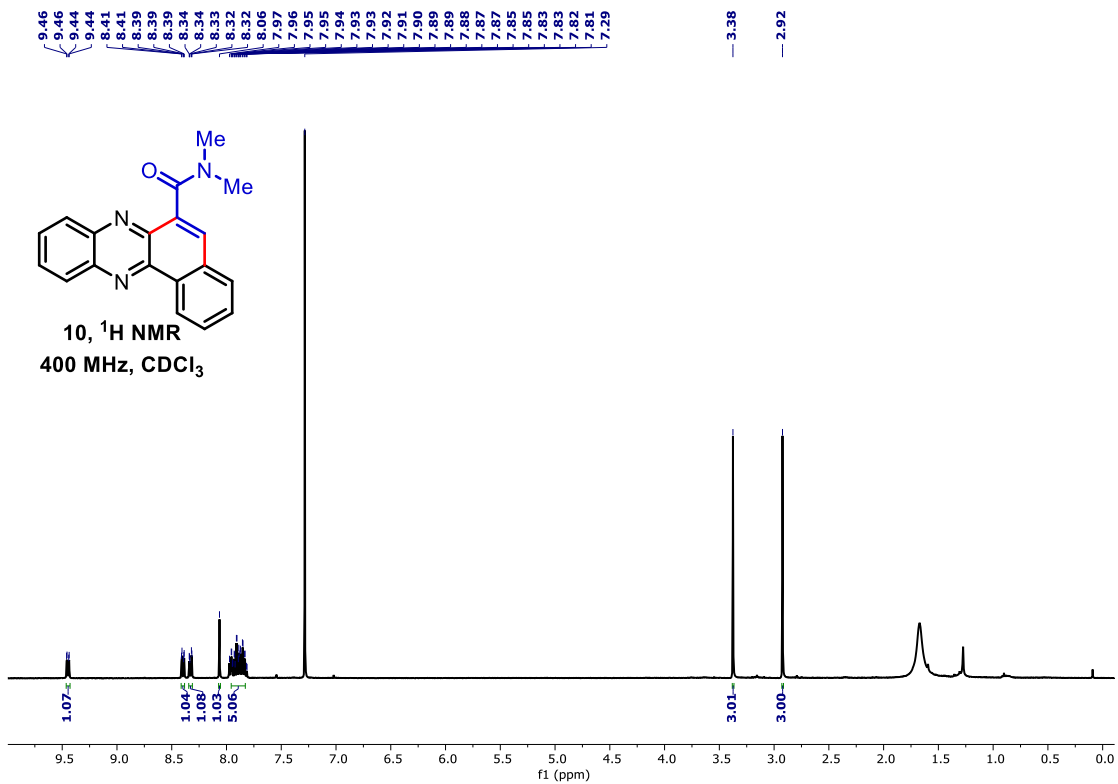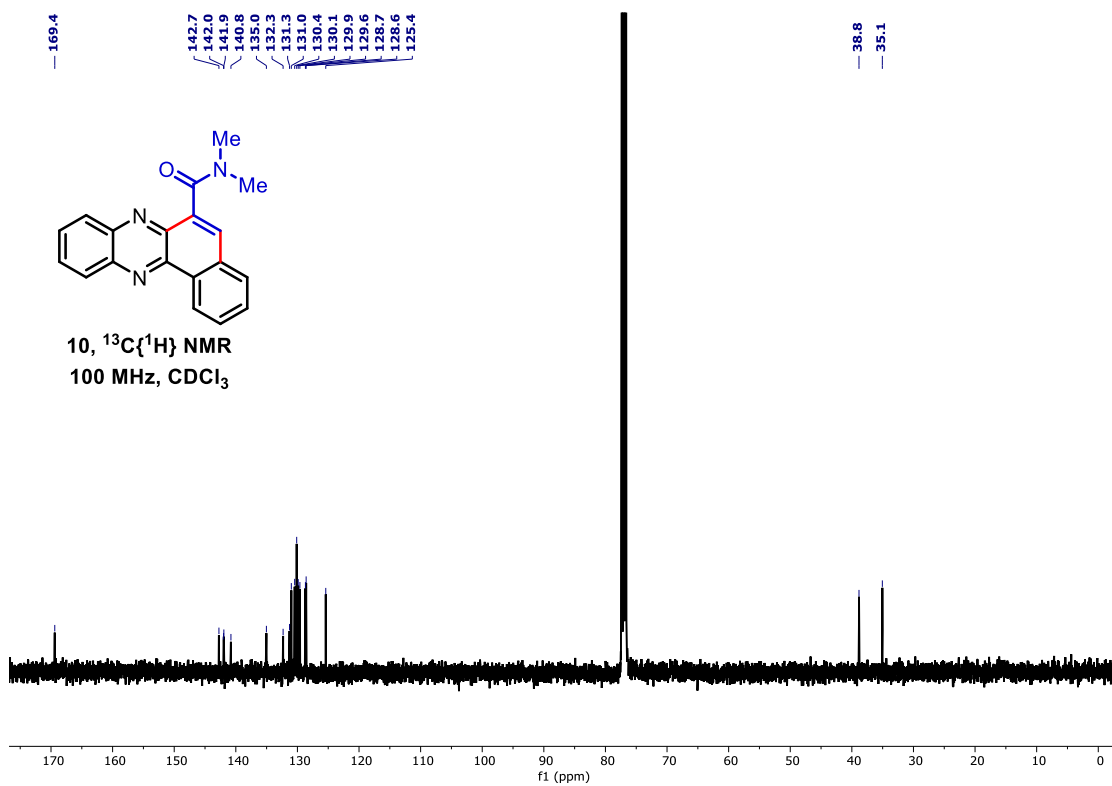

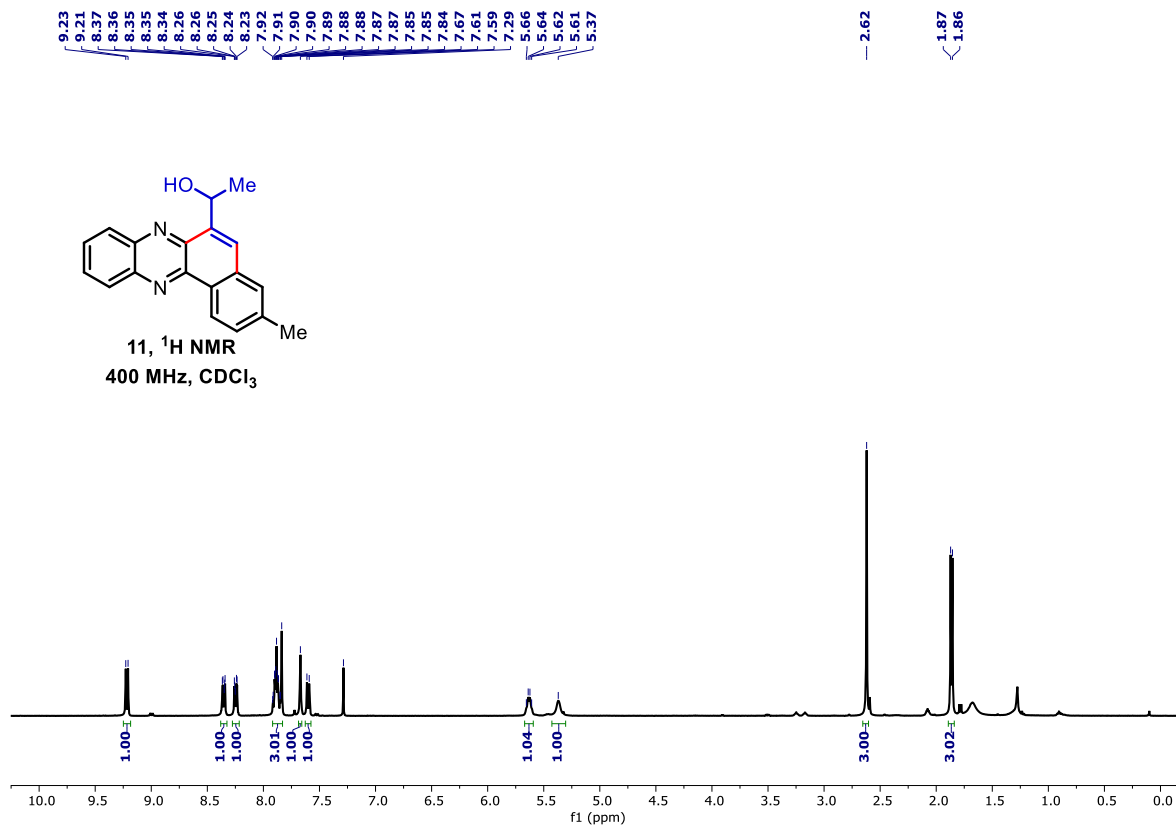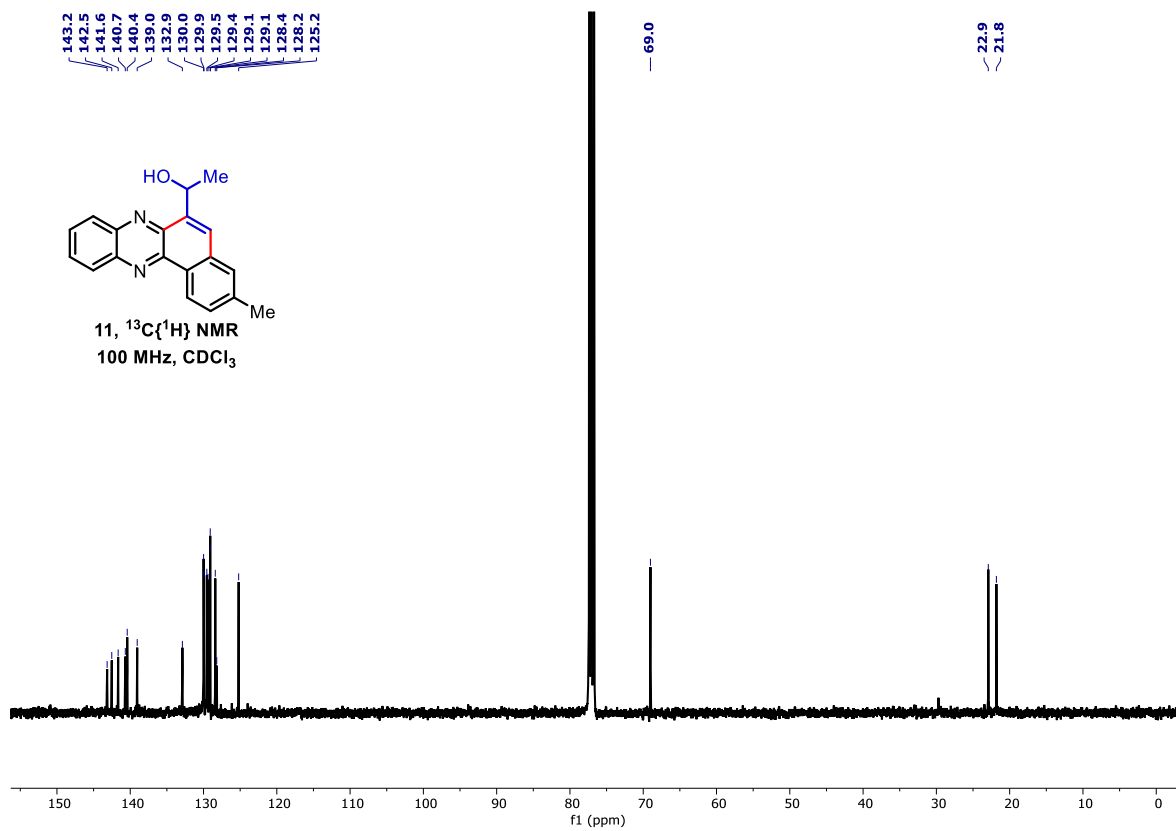

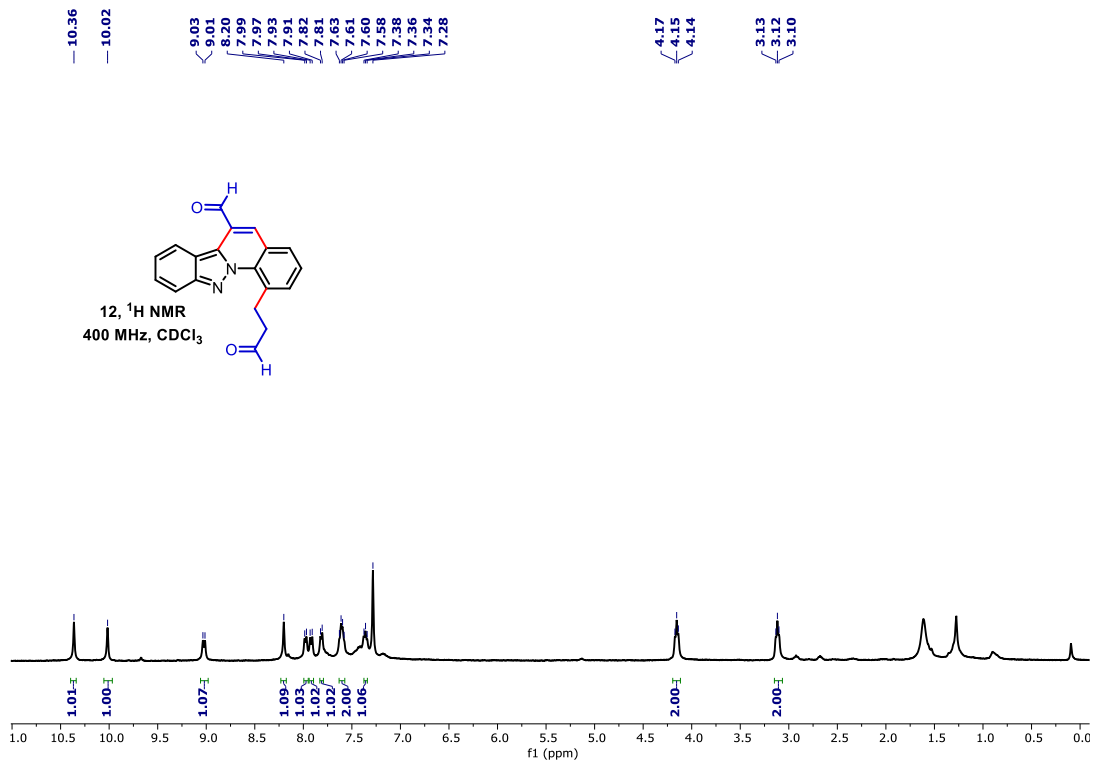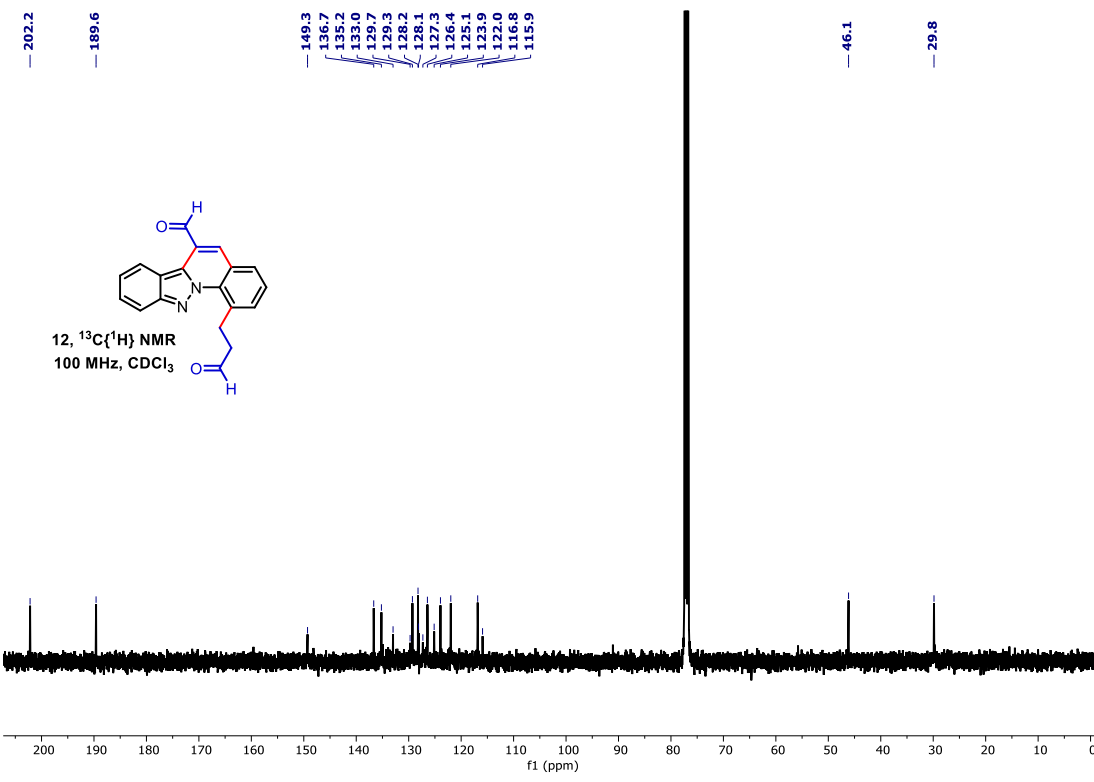



#### 14. Single crystal X-ray diffraction data of 5aa

Single crystals of [C<sub>16</sub>H<sub>10</sub>N<sub>2</sub>O] **5aa** were grown from slow evaporation of chloroform: hexane solution. A suitable crystal was selected and mounted on a XtaLAB AFC12 (RINC): Kappa dual home/near diffractometer. The crystal was kept at 123(2) K during data collection. Using Olex2<sup>5</sup>, the structure was solved with the SHELXT<sup>6</sup> structure solution program using Intrinsic Phasing and refined with the SHELXL<sup>7</sup> refinement package using Least Squares minimisation.

**Table S3 Crystal data and structure refinement for 5aa**

|                                             |                                                               |
|---------------------------------------------|---------------------------------------------------------------|
| Empirical formula                           | C <sub>16</sub> H <sub>10</sub> N <sub>2</sub> O              |
| Formula weight                              | 246.26                                                        |
| Temperature/K                               | 123(2)                                                        |
| Crystal system                              | triclinic                                                     |
| Space group                                 | P-1                                                           |
| a/Å                                         | 8.0807(2)                                                     |
| b/Å                                         | 11.4488(3)                                                    |
| c/Å                                         | 13.0502(4)                                                    |
| α/°                                         | 75.453(2)                                                     |
| β/°                                         | 79.894(2)                                                     |
| γ/°                                         | 79.458(2)                                                     |
| Volume/Å <sup>3</sup>                       | 1138.21(6)                                                    |
| Z                                           | 4                                                             |
| ρ <sub>calc</sub> /cm <sup>3</sup>          | 1.437                                                         |
| μ/mm <sup>-1</sup>                          | 0.736                                                         |
| F(000)                                      | 512.0                                                         |
| Crystal size/mm <sup>3</sup>                | 0.19 × 0.05 × 0.04                                            |
| Radiation                                   | Cu Kα (λ = 1.54184)                                           |
| 2θ range for data collection/°              | 8.064 to 159.736                                              |
| Index ranges                                | -9 ≤ h ≤ 6, -14 ≤ k ≤ 14, -16 ≤ l ≤ 15                        |
| Reflections collected                       | 12496                                                         |
| Independent reflections                     | 4788 [R <sub>int</sub> = 0.0315, R <sub>sigma</sub> = 0.0394] |
| Data/restraints/parameters                  | 4788/0/343                                                    |
| Goodness-of-fit on F <sup>2</sup>           | 1.066                                                         |
| Final R indexes [I ≥ 2σ (I)]                | R <sub>1</sub> = 0.0395, wR <sub>2</sub> = 0.1073             |
| Final R indexes [all data]                  | R <sub>1</sub> = 0.0440, wR <sub>2</sub> = 0.1105             |
| Largest diff. peak/hole / e Å <sup>-3</sup> | 0.21/-0.30                                                    |

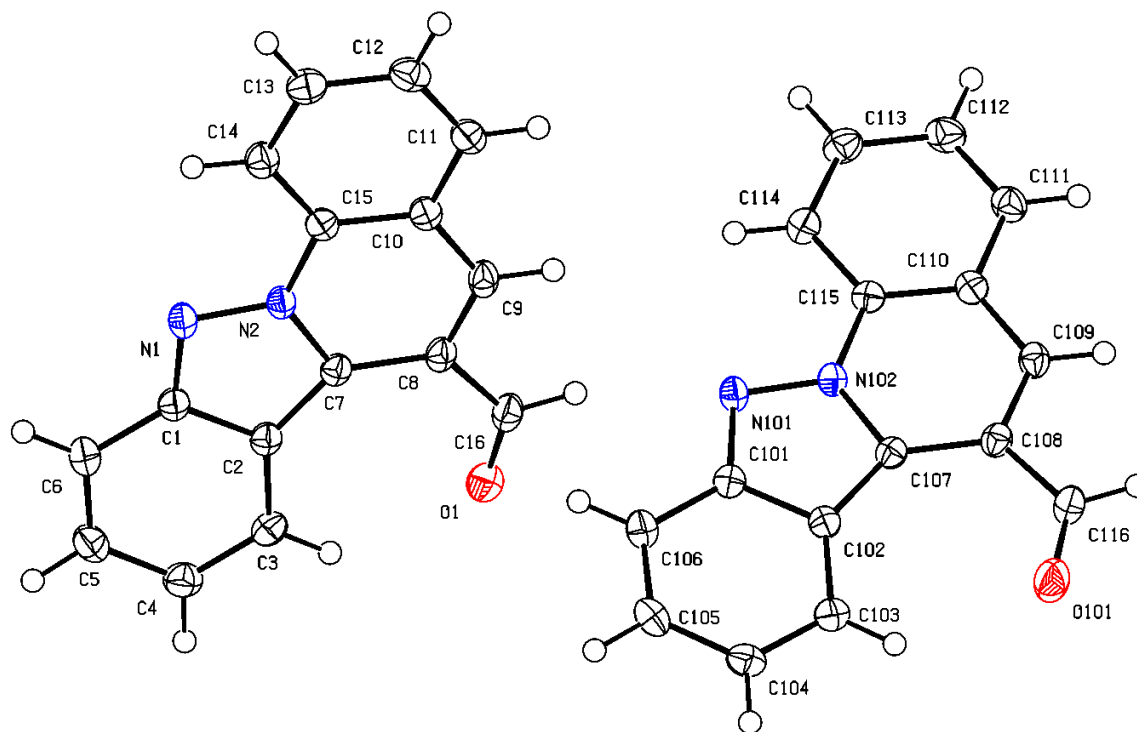

**Figure S1.** The ORTEP diagram of **5aa** [CCDC No 2294834].

## 15. References

1. K. Kumar, S. R. Mudshinge, S. Goyal, M. Gangar and V. A. Nair, *Tetrahedron Lett.* 2015, **56**, 1266-1271.
2. A. N Prasad and B. M Reddy, *Curr. Catal.* 2013, **2**, 159-172.
3. Y. Yuan, S.-Y. Zhang, W.-H. Dong, F. Wu, X.-M. Xie and Z.-G. Zhang, *Adv. Synth. Catal.* 2021, **363**, 4216-4221.
4. S. Wang, R. Li, S. Jiang, H. Huang, W. Shao and G. J. Deng, *Adv. Synth. Catal.* 2022, **364**, 1481-1487.
5. O. V. Dolomanov, L. J. Bourhis, R. J. Gildea, J. A. Howard and H. Puschmann, *J. Appl. Crystallogr.* 2009, **42**, 339-341.
6. G. M. Sheldrick, *Acta Crystallogr. Sect. A: Found. Adv.* 2015, **71**, 3-8.
7. G. M. Sheldrick, *Acta Crystallogr., Sect. C: Cryst. Struct. Commun.* 2015, **71**, 3-8.
